# Supplementary material for: Patterns of Microbiome Composition Vary Across Spatial Scales in a Specialist Insect
Source: Front Microbiol. 2022 Jun 2;13:898744. doi: 10.3389/fmicb.2022.898744 (PMC9201478; doi:10.3389/fmicb.2022.898744)
Supplement: Supplementary file 1 [file Data_Sheet_1.xlsx]

## Sheet: Table1
Supplementary table 1. Total list of taxa appearing in western corn rootworm (Diabrotica virgifera virgifera) and northern corn rootworm (Diabrotica barberi) rarefied ASV tables
Kingdom	Phylum	Class	Order	Family	Genus	Species	OTU
Bacteria	Proteobacteria	Gammaproteobacteria	Enterobacteriales	Enterobacteriaceae	NA	NA	ASV_2
Bacteria	Firmicutes	Bacilli	Lactobacillales	Streptococcaceae	Lactococcus	NA	ASV_4
Bacteria	Proteobacteria	Gammaproteobacteria	Enterobacteriales	Enterobacteriaceae	Serratia	NA	ASV_5
Bacteria	Proteobacteria	Gammaproteobacteria	Enterobacteriales	Enterobacteriaceae	Providencia	NA	ASV_6
Bacteria	Proteobacteria	Gammaproteobacteria	Enterobacteriales	Enterobacteriaceae	NA	NA	ASV_7
Bacteria	Firmicutes	Bacilli	Lactobacillales	Enterococcaceae	Enterococcus	NA	ASV_8
Bacteria	Proteobacteria	Gammaproteobacteria	Enterobacteriales	Enterobacteriaceae	NA	NA	ASV_9
Bacteria	Proteobacteria	Gammaproteobacteria	Enterobacteriales	Enterobacteriaceae	NA	NA	ASV_10
Bacteria	Proteobacteria	Gammaproteobacteria	Enterobacteriales	Enterobacteriaceae	NA	NA	ASV_11
Bacteria	Proteobacteria	Gammaproteobacteria	Pseudomonadales	Pseudomonadaceae	Pseudomonas	NA	ASV_12
Bacteria	Firmicutes	Bacilli	Lactobacillales	Leuconostocaceae	Weissella	NA	ASV_13
Bacteria	Proteobacteria	Gammaproteobacteria	Enterobacteriales	Enterobacteriaceae	Morganella	NA	ASV_14
Bacteria	Firmicutes	Bacilli	Lactobacillales	Enterococcaceae	Enterococcus	NA	ASV_15
Bacteria	Proteobacteria	Gammaproteobacteria	Enterobacteriales	Enterobacteriaceae	Pantoea	NA	ASV_16
Bacteria	Proteobacteria	Gammaproteobacteria	Pseudomonadales	Pseudomonadaceae	Pseudomonas	NA	ASV_17
Bacteria	Firmicutes	Bacilli	Lactobacillales	Streptococcaceae	Lactococcus	Lactococcus garvieae subsp. garvieae	ASV_20
Bacteria	Proteobacteria	Gammaproteobacteria	Enterobacteriales	Enterobacteriaceae	Serratia	NA	ASV_22
Bacteria	Proteobacteria	Gammaproteobacteria	Enterobacteriales	Enterobacteriaceae	Leminorella	unidentified	ASV_23
Bacteria	Actinobacteria	Actinobacteria	Corynebacteriales	Corynebacteriaceae	Corynebacterium 1	NA	ASV_24
Bacteria	Firmicutes	Bacilli	Lactobacillales	Leuconostocaceae	Leuconostoc	NA	ASV_26
Bacteria	Proteobacteria	Gammaproteobacteria	Enterobacteriales	Enterobacteriaceae	NA	NA	ASV_27
Bacteria	Proteobacteria	Gammaproteobacteria	Pseudomonadales	Moraxellaceae	Acinetobacter	Acinetobacter calcoaceticus	ASV_28
Bacteria	Proteobacteria	Gammaproteobacteria	Pseudomonadales	Moraxellaceae	Acinetobacter	NA	ASV_29
Bacteria	Tenericutes	Mollicutes	Entomoplasmatales	Spiroplasmataceae	Spiroplasma	Spiroplasma sp.	ASV_30
Bacteria	Proteobacteria	Gammaproteobacteria	Enterobacteriales	Enterobacteriaceae	NA	NA	ASV_32
Bacteria	Proteobacteria	Gammaproteobacteria	Enterobacteriales	Enterobacteriaceae	NA	NA	ASV_33
Bacteria	Proteobacteria	Gammaproteobacteria	Xanthomonadales	Xanthomonadaceae	Stenotrophomonas	NA	ASV_34
Bacteria	Proteobacteria	Gammaproteobacteria	Enterobacteriales	Enterobacteriaceae	NA	NA	ASV_35
Bacteria	Actinobacteria	Actinobacteria	Corynebacteriales	Corynebacteriaceae	Corynebacterium 1	NA	ASV_38
Bacteria	Actinobacteria	Actinobacteria	Corynebacteriales	Corynebacteriaceae	Corynebacterium 1	NA	ASV_40
Bacteria	Proteobacteria	Gammaproteobacteria	Pseudomonadales	Pseudomonadaceae	Pseudomonas	NA	ASV_41
Bacteria	Proteobacteria	Gammaproteobacteria	Pseudomonadales	Pseudomonadaceae	Pseudomonas	NA	ASV_42
Bacteria	Actinobacteria	Actinobacteria	Micrococcales	Microbacteriaceae	Microbacterium	NA	ASV_44
Bacteria	Firmicutes	Bacilli	Bacillales	Staphylococcaceae	Staphylococcus	NA	ASV_45
Bacteria	Proteobacteria	Gammaproteobacteria	Pseudomonadales	Moraxellaceae	Acinetobacter	NA	ASV_46
Bacteria	Proteobacteria	Alphaproteobacteria	Sphingomonadales	Sphingomonadaceae	Sphingomonas	NA	ASV_47
Bacteria	Proteobacteria	Gammaproteobacteria	Xanthomonadales	Xanthomonadaceae	Stenotrophomonas	NA	ASV_48
Bacteria	Proteobacteria	Gammaproteobacteria	Enterobacteriales	Enterobacteriaceae	NA	NA	ASV_49
Bacteria	Proteobacteria	Gammaproteobacteria	Pseudomonadales	Pseudomonadaceae	Pseudomonas	NA	ASV_50
Bacteria	Proteobacteria	Gammaproteobacteria	Enterobacteriales	Enterobacteriaceae	NA	NA	ASV_51
Bacteria	Proteobacteria	Gammaproteobacteria	Enterobacteriales	Enterobacteriaceae	NA	NA	ASV_53
Bacteria	Firmicutes	Bacilli	Lactobacillales	Leuconostocaceae	Leuconostoc	NA	ASV_56
Bacteria	Firmicutes	Bacilli	Lactobacillales	Carnobacteriaceae	Carnobacterium	NA	ASV_57
Bacteria	Firmicutes	Bacilli	Lactobacillales	Leuconostocaceae	Leuconostoc	NA	ASV_58
Bacteria	Proteobacteria	Gammaproteobacteria	Pseudomonadales	Pseudomonadaceae	Pseudomonas	NA	ASV_59
Bacteria	Proteobacteria	Gammaproteobacteria	Pseudomonadales	Pseudomonadaceae	Pseudomonas	NA	ASV_60
Bacteria	Proteobacteria	Gammaproteobacteria	Pseudomonadales	Pseudomonadaceae	Pseudomonas	Pseudomonas oryzihabitans	ASV_61
Bacteria	Proteobacteria	Alphaproteobacteria	Sphingomonadales	Sphingomonadaceae	Sphingomonas	NA	ASV_62
Bacteria	Proteobacteria	Gammaproteobacteria	Pseudomonadales	Pseudomonadaceae	Pseudomonas	NA	ASV_64
Bacteria	Proteobacteria	Gammaproteobacteria	Pseudomonadales	Moraxellaceae	Alkanindiges	NA	ASV_65
Bacteria	Bacteroidetes	Bacteroidia	Flavobacteriales	Weeksellaceae	Chryseobacterium	NA	ASV_67
Bacteria	Proteobacteria	Gammaproteobacteria	Pseudomonadales	Moraxellaceae	Acinetobacter	NA	ASV_68
Bacteria	Proteobacteria	Gammaproteobacteria	Pseudomonadales	Pseudomonadaceae	Pseudomonas	NA	ASV_69
Bacteria	Actinobacteria	Actinobacteria	Corynebacteriales	Tsukamurellaceae	Tsukamurella	NA	ASV_70
Bacteria	Proteobacteria	Gammaproteobacteria	Enterobacteriales	Enterobacteriaceae	NA	NA	ASV_71
Bacteria	Proteobacteria	Gammaproteobacteria	Xanthomonadales	Xanthomonadaceae	Stenotrophomonas	NA	ASV_72
Bacteria	Firmicutes	Bacilli	Lactobacillales	Streptococcaceae	Lactococcus	uncultured bacterium	ASV_73
Bacteria	Firmicutes	Bacilli	Bacillales	Staphylococcaceae	Staphylococcus	NA	ASV_75
Bacteria	Bacteroidetes	Bacteroidia	Sphingobacteriales	Sphingobacteriaceae	Sphingobacterium	NA	ASV_76
Bacteria	Proteobacteria	Alphaproteobacteria	Rhizobiales	Rhizobiaceae	Ochrobactrum	NA	ASV_77
Bacteria	Actinobacteria	Actinobacteria	Corynebacteriales	Nocardiaceae	Rhodococcus	NA	ASV_81
Bacteria	Firmicutes	Bacilli	Bacillales	Family XII	Exiguobacterium	NA	ASV_83
Bacteria	Proteobacteria	Gammaproteobacteria	Xanthomonadales	Xanthomonadaceae	Stenotrophomonas	NA	ASV_84
Bacteria	Proteobacteria	Gammaproteobacteria	Enterobacteriales	Enterobacteriaceae	NA	NA	ASV_85
Bacteria	Proteobacteria	Gammaproteobacteria	Pseudomonadales	Pseudomonadaceae	Pseudomonas	NA	ASV_86
Bacteria	Proteobacteria	Gammaproteobacteria	Pseudomonadales	Pseudomonadaceae	Pseudomonas	NA	ASV_87
Bacteria	Proteobacteria	Gammaproteobacteria	Enterobacteriales	Enterobacteriaceae	NA	NA	ASV_88
Bacteria	Firmicutes	Bacilli	Lactobacillales	Enterococcaceae	Enterococcus	NA	ASV_89
Bacteria	Bacteroidetes	Bacteroidia	Flavobacteriales	Weeksellaceae	Chryseobacterium	NA	ASV_92
Bacteria	Bacteroidetes	Bacteroidia	Flavobacteriales	Weeksellaceae	Chryseobacterium	NA	ASV_93
Bacteria	Proteobacteria	Gammaproteobacteria	Enterobacteriales	Enterobacteriaceae	NA	NA	ASV_94
Bacteria	Proteobacteria	Alphaproteobacteria	Rhizobiales	Rhizobiaceae	Allorhizobium-Neorhizobium-Pararhizobium-Rhizobium	NA	ASV_95
Bacteria	Proteobacteria	Gammaproteobacteria	Enterobacteriales	Enterobacteriaceae	NA	NA	ASV_97
Bacteria	Proteobacteria	Gammaproteobacteria	Pseudomonadales	Pseudomonadaceae	Pseudomonas	NA	ASV_98
Bacteria	Actinobacteria	Actinobacteria	Micrococcales	Microbacteriaceae	Microbacterium	NA	ASV_102
Bacteria	Firmicutes	Bacilli	Lactobacillales	Streptococcaceae	Lactococcus	NA	ASV_103
Bacteria	Actinobacteria	Actinobacteria	Micrococcales	Micrococcaceae	Glutamicibacter	NA	ASV_105
Bacteria	Actinobacteria	Actinobacteria	Propionibacteriales	Propionibacteriaceae	Cutibacterium	NA	ASV_108
Bacteria	Proteobacteria	Gammaproteobacteria	Cellvibrionales	Cellvibrionaceae	NA	NA	ASV_109
Bacteria	Firmicutes	Bacilli	Lactobacillales	NA	NA	NA	ASV_110
Bacteria	Proteobacteria	Gammaproteobacteria	Enterobacteriales	Enterobacteriaceae	NA	NA	ASV_111
Bacteria	Actinobacteria	Actinobacteria	Kineosporiales	Kineosporiaceae	Quadrisphaera	NA	ASV_112
Bacteria	Proteobacteria	Gammaproteobacteria	Xanthomonadales	Xanthomonadaceae	Stenotrophomonas	NA	ASV_113
Bacteria	Actinobacteria	Actinobacteria	Corynebacteriales	Nocardiaceae	Gordonia	NA	ASV_114
Bacteria	Proteobacteria	Gammaproteobacteria	Betaproteobacteriales	Burkholderiaceae	Comamonas	NA	ASV_115
Bacteria	Actinobacteria	Actinobacteria	Micrococcales	Microbacteriaceae	NA	NA	ASV_116
Bacteria	Actinobacteria	Actinobacteria	Micrococcales	Microbacteriaceae	Microbacterium	NA	ASV_117
Bacteria	Firmicutes	Bacilli	Lactobacillales	Streptococcaceae	Lactococcus	NA	ASV_118
Bacteria	Firmicutes	Bacilli	Lactobacillales	Enterococcaceae	Enterococcus	NA	ASV_119
Bacteria	Actinobacteria	Actinobacteria	Micrococcales	Microbacteriaceae	Curtobacterium	NA	ASV_121
Bacteria	Firmicutes	Bacilli	Bacillales	Bacillaceae	Bacillus	NA	ASV_123
Bacteria	Proteobacteria	Gammaproteobacteria	Betaproteobacteriales	Burkholderiaceae	Duganella	uncultured bacterium	ASV_124
Bacteria	Actinobacteria	Actinobacteria	Micrococcales	Microbacteriaceae	Curtobacterium	NA	ASV_125
Bacteria	Actinobacteria	Actinobacteria	Corynebacteriales	Nocardiaceae	Rhodococcus	NA	ASV_127
Bacteria	Firmicutes	Bacilli	Bacillales	Staphylococcaceae	Staphylococcus	NA	ASV_128
Bacteria	Proteobacteria	Gammaproteobacteria	Betaproteobacteriales	Burkholderiaceae	Massilia	NA	ASV_129
Bacteria	Actinobacteria	Actinobacteria	Corynebacteriales	Tsukamurellaceae	Tsukamurella	uous_taxa	ASV_131
Bacteria	Proteobacteria	Alphaproteobacteria	Rhizobiales	Beijerinckiaceae	Methylobacterium	NA	ASV_132
Bacteria	Proteobacteria	Alphaproteobacteria	Sphingomonadales	Sphingomonadaceae	Sphingomonas	NA	ASV_133
Bacteria	Actinobacteria	Actinobacteria	Micrococcales	Micrococcaceae	NA	NA	ASV_134
Bacteria	Proteobacteria	Gammaproteobacteria	Betaproteobacteriales	Burkholderiaceae	NA	NA	ASV_138
Bacteria	Proteobacteria	Alphaproteobacteria	Rhodobacterales	Rhodobacteraceae	Gemmobacter	NA	ASV_139
Bacteria	Proteobacteria	Alphaproteobacteria	Acetobacterales	Acetobacteraceae	Gluconobacter	NA	ASV_140
Bacteria	Bacteroidetes	Bacteroidia	Flavobacteriales	Weeksellaceae	Chishuiella	uous_taxa	ASV_141
Bacteria	Tenericutes	Mollicutes	Entomoplasmatales	Spiroplasmataceae	Spiroplasma	uncultured bacterium	ASV_142
Bacteria	Proteobacteria	Gammaproteobacteria	Enterobacteriales	Enterobacteriaceae	NA	NA	ASV_144
Bacteria	Proteobacteria	Alphaproteobacteria	Rhizobiales	Rhizobiaceae	Aureimonas	NA	ASV_146
Bacteria	Firmicutes	Bacilli	Lactobacillales	Carnobacteriaceae	Carnobacterium	NA	ASV_147
Bacteria	Proteobacteria	Gammaproteobacteria	Enterobacteriales	Enterobacteriaceae	NA	NA	ASV_148
Bacteria	Proteobacteria	Gammaproteobacteria	Enterobacteriales	Enterobacteriaceae	Hafnia-Obesumbacterium	NA	ASV_149
Bacteria	Proteobacteria	Gammaproteobacteria	Pseudomonadales	Pseudomonadaceae	Pseudomonas	NA	ASV_150
Bacteria	Proteobacteria	Alphaproteobacteria	Caulobacterales	Caulobacteraceae	Brevundimonas	NA	ASV_152
Bacteria	Proteobacteria	Gammaproteobacteria	Enterobacteriales	Enterobacteriaceae	NA	NA	ASV_153
Bacteria	Firmicutes	Bacilli	Lactobacillales	NA	NA	NA	ASV_154
Bacteria	Actinobacteria	Actinobacteria	Micrococcales	Microbacteriaceae	NA	NA	ASV_155
Bacteria	Proteobacteria	Alphaproteobacteria	Rhizobiales	Rhizobiaceae	Aureimonas	uous_taxa	ASV_156
Bacteria	Proteobacteria	Gammaproteobacteria	Betaproteobacteriales	Burkholderiaceae	NA	NA	ASV_157
Bacteria	Bacteroidetes	Bacteroidia	Flavobacteriales	Weeksellaceae	Chryseobacterium	NA	ASV_158
Bacteria	Proteobacteria	Alphaproteobacteria	Rhizobiales	Beijerinckiaceae	Methylobacterium	Methylobacterium aquaticum	ASV_159
Bacteria	Proteobacteria	Gammaproteobacteria	Pseudomonadales	Pseudomonadaceae	Pseudomonas	NA	ASV_160
Bacteria	Firmicutes	Bacilli	Lactobacillales	Streptococcaceae	Lactococcus	NA	ASV_162
Bacteria	Proteobacteria	Gammaproteobacteria	Betaproteobacteriales	Burkholderiaceae	Achromobacter	NA	ASV_165
Bacteria	Firmicutes	Bacilli	Lactobacillales	Leuconostocaceae	Weissella	NA	ASV_166
Bacteria	Proteobacteria	Gammaproteobacteria	Betaproteobacteriales	Burkholderiaceae	Massilia	NA	ASV_167
Bacteria	Proteobacteria	Gammaproteobacteria	Pseudomonadales	Pseudomonadaceae	Pseudomonas	NA	ASV_169
Bacteria	Proteobacteria	Gammaproteobacteria	Pseudomonadales	Moraxellaceae	Acinetobacter	NA	ASV_170
Bacteria	Proteobacteria	Gammaproteobacteria	Enterobacteriales	Enterobacteriaceae	NA	NA	ASV_171
Bacteria	Bacteroidetes	Bacteroidia	Cytophagales	Microscillaceae	Siphonobacter	uous_taxa	ASV_172
Bacteria	Actinobacteria	Actinobacteria	Streptomycetales	Streptomycetaceae	Streptomyces	NA	ASV_174
Bacteria	Proteobacteria	Alphaproteobacteria	Sphingomonadales	Sphingomonadaceae	Sphingomonas	NA	ASV_175
Bacteria	Proteobacteria	Alphaproteobacteria	Rhizobiales	Beijerinckiaceae	Methylobacterium	NA	ASV_177
Bacteria	Firmicutes	Bacilli	Lactobacillales	Leuconostocaceae	Leuconostoc	NA	ASV_178
Bacteria	Proteobacteria	Gammaproteobacteria	Betaproteobacteriales	Burkholderiaceae	NA	NA	ASV_180
Bacteria	Proteobacteria	Alphaproteobacteria	Rhizobiales	Rhizobiaceae	Allorhizobium-Neorhizobium-Pararhizobium-Rhizobium	NA	ASV_182
Bacteria	Actinobacteria	Actinobacteria	Corynebacteriales	Nocardiaceae	Nocardia	NA	ASV_183
Bacteria	Proteobacteria	Gammaproteobacteria	Enterobacteriales	Enterobacteriaceae	NA	NA	ASV_184
Bacteria	Firmicutes	Bacilli	Lactobacillales	Streptococcaceae	Streptococcus	NA	ASV_186
Bacteria	Proteobacteria	Alphaproteobacteria	Sphingomonadales	Sphingomonadaceae	Sphingomonas	NA	ASV_187
Bacteria	Proteobacteria	Gammaproteobacteria	Enterobacteriales	Enterobacteriaceae	NA	NA	ASV_188
Bacteria	Proteobacteria	Gammaproteobacteria	Betaproteobacteriales	Burkholderiaceae	Burkholderia-Caballeronia-Paraburkholderia	NA	ASV_191
Bacteria	Actinobacteria	Actinobacteria	Micrococcales	Microbacteriaceae	Leucobacter	NA	ASV_192
Bacteria	Proteobacteria	Gammaproteobacteria	Pseudomonadales	Pseudomonadaceae	Pseudomonas	NA	ASV_193
Bacteria	Proteobacteria	Alphaproteobacteria	Rhizobiales	Xanthobacteraceae	Bradyrhizobium	NA	ASV_194
Bacteria	Proteobacteria	Gammaproteobacteria	Enterobacteriales	Enterobacteriaceae	NA	NA	ASV_195
Bacteria	Proteobacteria	Gammaproteobacteria	Enterobacteriales	Enterobacteriaceae	NA	NA	ASV_198
Bacteria	Bacteroidetes	Bacteroidia	Sphingobacteriales	Sphingobacteriaceae	Sphingobacterium	Sphingobacterium multivorum	ASV_200
Bacteria	Proteobacteria	Gammaproteobacteria	Xanthomonadales	Xanthomonadaceae	Stenotrophomonas	NA	ASV_201
Bacteria	Actinobacteria	Actinobacteria	Streptomycetales	Streptomycetaceae	Streptomyces	NA	ASV_204
Bacteria	Proteobacteria	Alphaproteobacteria	Rhizobiales	Rhizobiaceae	Aureimonas	uous_taxa	ASV_205
Bacteria	Bacteroidetes	Bacteroidia	Sphingobacteriales	Sphingobacteriaceae	Pedobacter	NA	ASV_207
Bacteria	Actinobacteria	Actinobacteria	Corynebacteriales	Nocardiaceae	Nocardia	NA	ASV_208
Bacteria	Proteobacteria	Gammaproteobacteria	Betaproteobacteriales	Burkholderiaceae	Massilia	NA	ASV_209
Bacteria	Proteobacteria	Gammaproteobacteria	Pseudomonadales	Moraxellaceae	Acinetobacter	Acinetobacter baylyi	ASV_210
Bacteria	Actinobacteria	Actinobacteria	Micrococcales	Microbacteriaceae	Microbacterium	NA	ASV_211
Bacteria	Actinobacteria	Actinobacteria	Micrococcales	Micrococcaceae	NA	NA	ASV_212
Bacteria	Proteobacteria	Gammaproteobacteria	Xanthomonadales	Xanthomonadaceae	Stenotrophomonas	NA	ASV_214
Bacteria	Proteobacteria	Gammaproteobacteria	Pseudomonadales	Moraxellaceae	Psychrobacter	Psychrobacter pulmonis	ASV_215
Bacteria	Actinobacteria	Actinobacteria	Micrococcales	Sanguibacteraceae	Sanguibacter	uous_taxa	ASV_217
Bacteria	Bacteroidetes	Bacteroidia	Sphingobacteriales	Sphingobacteriaceae	Sphingobacterium	NA	ASV_218
Bacteria	Firmicutes	Bacilli	Lactobacillales	Streptococcaceae	Streptococcus	NA	ASV_219
Bacteria	Firmicutes	Bacilli	Bacillales	Bacillaceae	Bacillus	NA	ASV_220
Bacteria	Proteobacteria	Gammaproteobacteria	Pseudomonadales	Moraxellaceae	Acinetobacter	Acinetobacter lwoffii	ASV_221
Bacteria	Bacteroidetes	Bacteroidia	Flavobacteriales	Weeksellaceae	Chryseobacterium	NA	ASV_222
Bacteria	Actinobacteria	Actinobacteria	Micrococcales	Micrococcaceae	NA	NA	ASV_223
Bacteria	Tenericutes	Mollicutes	Entomoplasmatales	Spiroplasmataceae	Spiroplasma	Spiroplasma sp.	ASV_226
Bacteria	Proteobacteria	Alphaproteobacteria	Sphingomonadales	Sphingomonadaceae	Sphingomonas	NA	ASV_227
Bacteria	Bacteroidetes	Bacteroidia	Sphingobacteriales	Sphingobacteriaceae	Sphingobacterium	NA	ASV_228
Bacteria	Patescibacteria	Saccharimonadia	Saccharimonadales	Saccharimonadaceae	uncultured bacterium	uncultured bacterium	ASV_229
Bacteria	Firmicutes	Bacilli	Bacillales	NA	NA	NA	ASV_230
Bacteria	Proteobacteria	Gammaproteobacteria	Betaproteobacteriales	Burkholderiaceae	NA	NA	ASV_236
Bacteria	Proteobacteria	Alphaproteobacteria	Rhizobiales	Rhizobiaceae	Ochrobactrum	NA	ASV_237
Bacteria	Proteobacteria	Gammaproteobacteria	Betaproteobacteriales	Burkholderiaceae	Delftia	NA	ASV_239
Bacteria	Proteobacteria	Gammaproteobacteria	Betaproteobacteriales	Burkholderiaceae	Burkholderia-Caballeronia-Paraburkholderia	NA	ASV_240
Bacteria	Firmicutes	Bacilli	Bacillales	Paenibacillaceae	Ammoniphilus	uous_taxa	ASV_241
Bacteria	Proteobacteria	Gammaproteobacteria	Betaproteobacteriales	Burkholderiaceae	NA	NA	ASV_242
Bacteria	Actinobacteria	Actinobacteria	Corynebacteriales	Corynebacteriaceae	NA	NA	ASV_243
Bacteria	Firmicutes	Bacilli	Bacillales	Family XII	Exiguobacterium	NA	ASV_245
Bacteria	Actinobacteria	Actinobacteria	Micrococcales	Dermabacteraceae	Brachybacterium	NA	ASV_246
Bacteria	Firmicutes	Bacilli	Bacillales	Paenibacillaceae	Paenibacillus	Paenibacillus hunanensis	ASV_247
Bacteria	Proteobacteria	Gammaproteobacteria	Xanthomonadales	Xanthomonadaceae	Stenotrophomonas	NA	ASV_251
Bacteria	Bacteroidetes	Bacteroidia	Flavobacteriales	Weeksellaceae	Chryseobacterium	NA	ASV_252
Bacteria	Bacteroidetes	Bacteroidia	Sphingobacteriales	Sphingobacteriaceae	Sphingobacterium	Sphingobacterium sp. 23D10-4-9	ASV_253
Bacteria	Firmicutes	Bacilli	Lactobacillales	Lactobacillaceae	NA	NA	ASV_254
Bacteria	Firmicutes	Bacilli	Lactobacillales	Streptococcaceae	Streptococcus	NA	ASV_255
Bacteria	Firmicutes	Bacilli	Bacillales	Planococcaceae	Rummeliibacillus	NA	ASV_256
Bacteria	Actinobacteria	Actinobacteria	Micrococcales	Microbacteriaceae	NA	NA	ASV_257
Bacteria	Proteobacteria	Alphaproteobacteria	Azospirillales	Azospirillaceae	Azospirillum	NA	ASV_258
Bacteria	Actinobacteria	Actinobacteria	Micrococcales	Microbacteriaceae	Microbacterium	NA	ASV_260
Bacteria	Actinobacteria	Actinobacteria	Pseudonocardiales	Pseudonocardiaceae	Pseudonocardia	uous_taxa	ASV_261
Bacteria	Bacteroidetes	Bacteroidia	Flavobacteriales	Weeksellaceae	Chryseobacterium	NA	ASV_262
Bacteria	Actinobacteria	Actinobacteria	Streptomycetales	Streptomycetaceae	Streptomyces	NA	ASV_263
Bacteria	Actinobacteria	Actinobacteria	Corynebacteriales	Corynebacteriaceae	Corynebacterium 1	uncultured organism	ASV_264
Bacteria	Patescibacteria	Saccharimonadia	Saccharimonadales	NA	NA	NA	ASV_266
Bacteria	Actinobacteria	Actinobacteria	Corynebacteriales	Tsukamurellaceae	Tsukamurella	uous_taxa	ASV_267
Bacteria	Proteobacteria	Alphaproteobacteria	Rhizobiales	Rhizobiaceae	Shinella	uous_taxa	ASV_269
Bacteria	Proteobacteria	Gammaproteobacteria	Enterobacteriales	Enterobacteriaceae	Kosakonia	uous_taxa	ASV_270
Bacteria	Bacteroidetes	Bacteroidia	Flavobacteriales	Weeksellaceae	Chryseobacterium	NA	ASV_271
Bacteria	Actinobacteria	Actinobacteria	Frankiales	Geodermatophilaceae	Geodermatophilus	uous_taxa	ASV_272
Bacteria	Actinobacteria	Actinobacteria	Micrococcales	Brevibacteriaceae	Brevibacterium	NA	ASV_273
Bacteria	Firmicutes	Bacilli	Lactobacillales	Streptococcaceae	Streptococcus	Streptococcus salivarius subsp. thermophilus	ASV_274
Bacteria	Proteobacteria	Gammaproteobacteria	Pseudomonadales	Pseudomonadaceae	Pseudomonas	NA	ASV_276
Bacteria	Actinobacteria	Actinobacteria	Micrococcales	Microbacteriaceae	Microbacterium	NA	ASV_277
Bacteria	Firmicutes	Bacilli	Bacillales	Bacillaceae	Fictibacillus	NA	ASV_279
Bacteria	Firmicutes	Bacilli	Lactobacillales	Enterococcaceae	Enterococcus	NA	ASV_280
Bacteria	Firmicutes	Bacilli	Lactobacillales	Streptococcaceae	Streptococcus	NA	ASV_281
Bacteria	Proteobacteria	Alphaproteobacteria	Sphingomonadales	Sphingomonadaceae	Sphingomonas	NA	ASV_282
Bacteria	Proteobacteria	Alphaproteobacteria	Acetobacterales	Acetobacteraceae	NA	NA	ASV_283
Bacteria	Proteobacteria	Gammaproteobacteria	Betaproteobacteriales	Burkholderiaceae	Burkholderia-Caballeronia-Paraburkholderia	NA	ASV_285
Bacteria	Firmicutes	Bacilli	Bacillales	Paenibacillaceae	Saccharibacillus	uncultured bacterium	ASV_286
Bacteria	Firmicutes	Erysipelotrichia	Erysipelotrichales	Erysipelotrichaceae	Turicibacter	NA	ASV_287
Bacteria	Firmicutes	Bacilli	Bacillales	Bacillaceae	Geobacillus	NA	ASV_290
Bacteria	Proteobacteria	Gammaproteobacteria	Pseudomonadales	Pseudomonadaceae	Pseudomonas	NA	ASV_291
Bacteria	Firmicutes	Clostridia	Clostridiales	Ruminococcaceae	Ruminococcus 1	NA	ASV_293
Bacteria	Proteobacteria	Gammaproteobacteria	Pseudomonadales	Moraxellaceae	Acinetobacter	NA	ASV_294
Bacteria	Proteobacteria	Gammaproteobacteria	Pseudomonadales	Moraxellaceae	Acinetobacter	NA	ASV_296
Bacteria	Proteobacteria	Alphaproteobacteria	Rhizobiales	Beijerinckiaceae	Methylobacterium	NA	ASV_297
Bacteria	Proteobacteria	Gammaproteobacteria	Betaproteobacteriales	Burkholderiaceae	NA	NA	ASV_298
Bacteria	Bacteroidetes	Bacteroidia	Cytophagales	Microscillaceae	Siphonobacter	uous_taxa	ASV_300
Bacteria	Proteobacteria	Gammaproteobacteria	Pseudomonadales	Moraxellaceae	Acinetobacter	Acinetobacter radioresistens	ASV_301
Bacteria	Actinobacteria	Actinobacteria	Propionibacteriales	Nocardioidaceae	Aeromicrobium	NA	ASV_302
Bacteria	Firmicutes	Bacilli	Lactobacillales	Lactobacillaceae	Lactobacillus	Lactobacillus micheneri	ASV_303
Bacteria	Actinobacteria	Actinobacteria	Corynebacteriales	Segniliparaceae	Segniliparus	uous_taxa	ASV_305
Bacteria	Proteobacteria	Gammaproteobacteria	Betaproteobacteriales	Burkholderiaceae	Burkholderia-Caballeronia-Paraburkholderia	NA	ASV_306
Bacteria	Actinobacteria	Actinobacteria	Corynebacteriales	Corynebacteriaceae	Corynebacterium 1	NA	ASV_307
Bacteria	Actinobacteria	Actinobacteria	Micrococcales	Microbacteriaceae	Microbacterium	NA	ASV_308
Bacteria	Proteobacteria	Alphaproteobacteria	Rhizobiales	Beijerinckiaceae	Methylobacterium	Methylobacterium aquaticum	ASV_310
Bacteria	Firmicutes	Bacilli	Lactobacillales	Leuconostocaceae	Leuconostoc	NA	ASV_312
Bacteria	Proteobacteria	Alphaproteobacteria	Sphingomonadales	Sphingomonadaceae	Sphingobium	NA	ASV_313
Bacteria	Firmicutes	Bacilli	Bacillales	Planococcaceae	Lysinibacillus	NA	ASV_314
Bacteria	Firmicutes	Bacilli	Lactobacillales	Leuconostocaceae	Weissella	NA	ASV_316
Bacteria	Proteobacteria	Alphaproteobacteria	Rhizobiales	Beijerinckiaceae	Methylobacterium	NA	ASV_317
Bacteria	Bacteroidetes	Bacteroidia	Bacteroidales	F082	NA	NA	ASV_322
Bacteria	Actinobacteria	Actinobacteria	Kineosporiales	Kineosporiaceae	Kineococcus	NA	ASV_324
Bacteria	Firmicutes	Bacilli	Bacillales	Bacillaceae	Bacillus	NA	ASV_325
Bacteria	Proteobacteria	Alphaproteobacteria	Rhizobiales	Beijerinckiaceae	Methylobacterium	NA	ASV_326
Bacteria	Actinobacteria	Actinobacteria	Micrococcales	Dermabacteraceae	Brachybacterium	NA	ASV_327
Bacteria	Proteobacteria	Gammaproteobacteria	Pseudomonadales	Pseudomonadaceae	Pseudomonas	NA	ASV_329
Bacteria	Proteobacteria	Alphaproteobacteria	Rhizobiales	Rhizobiaceae	Allorhizobium-Neorhizobium-Pararhizobium-Rhizobium	NA	ASV_330
Bacteria	Actinobacteria	Actinobacteria	Micrococcales	Microbacteriaceae	Agromyces	NA	ASV_331
Bacteria	Proteobacteria	Alphaproteobacteria	Rhizobiales	Rhizobiaceae	Allorhizobium-Neorhizobium-Pararhizobium-Rhizobium	NA	ASV_334
Bacteria	Proteobacteria	Gammaproteobacteria	Xanthomonadales	Rhodanobacteraceae	Dyella	NA	ASV_335
Bacteria	Bacteroidetes	Bacteroidia	Flavobacteriales	Weeksellaceae	Cloacibacterium	NA	ASV_338
Bacteria	Proteobacteria	Gammaproteobacteria	Betaproteobacteriales	Procabacteriaceae	Procabacter	NA	ASV_340
Bacteria	Actinobacteria	Actinobacteria	Corynebacteriales	Nocardiaceae	Nocardia	uous_taxa	ASV_342
Bacteria	Proteobacteria	Gammaproteobacteria	Pseudomonadales	Pseudomonadaceae	Pseudomonas	Pseudomonas xanthomarina	ASV_344
Bacteria	Tenericutes	Mollicutes	Entomoplasmatales	Spiroplasmataceae	Spiroplasma	NA	ASV_345
Bacteria	Proteobacteria	Alphaproteobacteria	Rhizobiales	Rhizobiaceae	Ochrobactrum	NA	ASV_346
Bacteria	Proteobacteria	Gammaproteobacteria	Betaproteobacteriales	Burkholderiaceae	Massilia	NA	ASV_347
Bacteria	Proteobacteria	Alphaproteobacteria	Sphingomonadales	Sphingomonadaceae	Novosphingobium	NA	ASV_349
Bacteria	Actinobacteria	Actinobacteria	Micrococcales	Microbacteriaceae	Frigoribacterium	uous_taxa	ASV_350
Bacteria	Firmicutes	Bacilli	Bacillales	Family XI	Gemella	NA	ASV_351
Bacteria	Firmicutes	Bacilli	Bacillales	Planococcaceae	NA	NA	ASV_353
Bacteria	Proteobacteria	Gammaproteobacteria	Betaproteobacteriales	Burkholderiaceae	Massilia	NA	ASV_356
Bacteria	Proteobacteria	Gammaproteobacteria	Pasteurellales	Pasteurellaceae	NA	NA	ASV_358
Bacteria	Actinobacteria	Actinobacteria	Corynebacteriales	Mycobacteriaceae	Mycobacterium	NA	ASV_359
Bacteria	Proteobacteria	Gammaproteobacteria	Enterobacteriales	Enterobacteriaceae	NA	NA	ASV_361
Bacteria	Actinobacteria	Actinobacteria	Corynebacteriales	Mycobacteriaceae	Mycobacterium	NA	ASV_363
Bacteria	Firmicutes	Bacilli	Bacillales	Bacillaceae	Bacillus	bacterium BAB-2943	ASV_364
Bacteria	Proteobacteria	Gammaproteobacteria	Enterobacteriales	Enterobacteriaceae	Escherichia-Shigella	NA	ASV_365
Bacteria	Actinobacteria	Actinobacteria	Micrococcales	Micrococcaceae	Glutamicibacter	NA	ASV_366
Bacteria	Proteobacteria	Gammaproteobacteria	Pseudomonadales	Moraxellaceae	Acinetobacter	NA	ASV_367
Bacteria	Firmicutes	Bacilli	Bacillales	Family XII	Exiguobacterium	NA	ASV_368
Bacteria	Actinobacteria	Actinobacteria	Frankiales	Nakamurellaceae	Nakamurella	NA	ASV_371
Bacteria	Actinobacteria	Actinobacteria	Streptomycetales	Streptomycetaceae	Streptomyces	NA	ASV_372
Bacteria	Actinobacteria	Actinobacteria	Actinomycetales	Actinomycetaceae	Actinomyces	NA	ASV_373
Bacteria	Actinobacteria	Actinobacteria	Streptomycetales	Streptomycetaceae	Streptomyces	NA	ASV_375
Bacteria	Proteobacteria	Gammaproteobacteria	Betaproteobacteriales	Burkholderiaceae	Massilia	NA	ASV_376
Bacteria	Proteobacteria	Alphaproteobacteria	Rhizobiales	Beijerinckiaceae	Methylobacterium	NA	ASV_378
Bacteria	Proteobacteria	Gammaproteobacteria	Enterobacteriales	Enterobacteriaceae	Serratia	NA	ASV_379
Bacteria	Proteobacteria	Gammaproteobacteria	Enterobacteriales	Enterobacteriaceae	NA	NA	ASV_380
Bacteria	Proteobacteria	Gammaproteobacteria	Pasteurellales	Pasteurellaceae	Haemophilus	NA	ASV_381
Bacteria	Proteobacteria	Gammaproteobacteria	Betaproteobacteriales	Burkholderiaceae	NA	NA	ASV_382
Bacteria	Firmicutes	Bacilli	Lactobacillales	Leuconostocaceae	Weissella	NA	ASV_383
Bacteria	Proteobacteria	Gammaproteobacteria	Steroidobacterales	Steroidobacteraceae	Steroidobacter	NA	ASV_385
Bacteria	Firmicutes	Bacilli	Bacillales	Bacillaceae	NA	NA	ASV_386
Bacteria	Firmicutes	Bacilli	Bacillales	Bacillaceae	Bacillus	NA	ASV_387
Bacteria	Proteobacteria	Alphaproteobacteria	Rhizobiales	Rhizobiaceae	Allorhizobium-Neorhizobium-Pararhizobium-Rhizobium	NA	ASV_388
Bacteria	Firmicutes	Bacilli	Lactobacillales	Lactobacillaceae	Lactobacillus	Lactobacillus micheneri	ASV_389
Bacteria	Actinobacteria	Actinobacteria	Corynebacteriales	Nocardiaceae	Gordonia	NA	ASV_392
Bacteria	Proteobacteria	Gammaproteobacteria	Pseudomonadales	Pseudomonadaceae	NA	NA	ASV_394
Bacteria	Actinobacteria	Actinobacteria	Micrococcales	Microbacteriaceae	Microbacterium	NA	ASV_396
Bacteria	Proteobacteria	Alphaproteobacteria	Rhodobacterales	Rhodobacteraceae	Paracoccus	NA	ASV_397
Bacteria	Actinobacteria	Actinobacteria	Corynebacteriales	Corynebacteriaceae	Lawsonella	NA	ASV_398
Bacteria	Proteobacteria	Gammaproteobacteria	Betaproteobacteriales	Neisseriaceae	Neisseria	NA	ASV_399
Bacteria	Bacteroidetes	Bacteroidia	Bacteroidales	Prevotellaceae	Prevotellaceae UCG-001	uncultured bacterium	ASV_400
Bacteria	Proteobacteria	Gammaproteobacteria	Enterobacteriales	Enterobacteriaceae	endosymbionts8	primary endosymbiont of Liposcelis decolor (host pop. HNZZ)	ASV_401
Bacteria	Actinobacteria	Actinobacteria	Micrococcales	Micrococcaceae	Paenarthrobacter	NA	ASV_403
Bacteria	Firmicutes	Clostridia	Clostridiales	Peptostreptococcaceae	Romboutsia	NA	ASV_404
Bacteria	Proteobacteria	Alphaproteobacteria	Rhodobacterales	Rhodobacteraceae	Paracoccus	NA	ASV_405
Bacteria	Proteobacteria	Gammaproteobacteria	Pseudomonadales	Moraxellaceae	Acinetobacter	NA	ASV_406
Bacteria	Actinobacteria	Actinobacteria	Corynebacteriales	Corynebacteriaceae	Corynebacterium 1	NA	ASV_407
Bacteria	Actinobacteria	Actinobacteria	Micrococcales	Microbacteriaceae	Leucobacter	NA	ASV_408
Bacteria	Actinobacteria	Actinobacteria	Corynebacteriales	Nocardiaceae	Nocardia	NA	ASV_409
Bacteria	Actinobacteria	Actinobacteria	Corynebacteriales	Nocardiaceae	Nocardia	NA	ASV_410
Bacteria	Actinobacteria	Actinobacteria	Corynebacteriales	Corynebacteriaceae	Corynebacterium 1	Corynebacterium xerosis	ASV_411
Bacteria	Proteobacteria	Gammaproteobacteria	Pseudomonadales	Pseudomonadaceae	Pseudomonas	NA	ASV_412
Bacteria	Patescibacteria	Saccharimonadia	Saccharimonadales	Saccharimonadaceae	uncultured bacterium	uncultured bacterium	ASV_413
Bacteria	Bacteroidetes	Bacteroidia	Flavobacteriales	Weeksellaceae	Chryseobacterium	NA	ASV_415
Bacteria	Proteobacteria	Alphaproteobacteria	Sphingomonadales	Sphingomonadaceae	Sphingomonas	uncultured Sphingomonadaceae bacterium	ASV_416
Bacteria	Firmicutes	Bacilli	Lactobacillales	Carnobacteriaceae	Desemzia	NA	ASV_417
Bacteria	Proteobacteria	Gammaproteobacteria	Pseudomonadales	Moraxellaceae	Acinetobacter	NA	ASV_418
Bacteria	Firmicutes	Clostridia	Clostridiales	Clostridiaceae 1	Clostridium sensu stricto 1	NA	ASV_420
Bacteria	Actinobacteria	Actinobacteria	Streptomycetales	Streptomycetaceae	NA	NA	ASV_421
Bacteria	Proteobacteria	Gammaproteobacteria	Xanthomonadales	Rhodanobacteraceae	Dyella	NA	ASV_422
Bacteria	Proteobacteria	Gammaproteobacteria	Xanthomonadales	Rhodanobacteraceae	Dyella	NA	ASV_424
Bacteria	Actinobacteria	Actinobacteria	Corynebacteriales	Nocardiaceae	Nocardia	NA	ASV_425
Bacteria	Spirochaetes	Spirochaetia	Spirochaetales	Spirochaetaceae	Treponema 2	uncultured bacterium	ASV_426
Bacteria	Firmicutes	Bacilli	Bacillales	Paenibacillaceae	Paenibacillus	NA	ASV_427
Bacteria	Proteobacteria	Gammaproteobacteria	Xanthomonadales	Xanthomonadaceae	Xanthomonas	NA	ASV_428
Bacteria	Proteobacteria	Deltaproteobacteria	Myxococcales	Archangiaceae	NA	NA	ASV_430
Bacteria	Firmicutes	Bacilli	Lactobacillales	Streptococcaceae	Streptococcus	NA	ASV_432
Bacteria	Firmicutes	Bacilli	Lactobacillales	Carnobacteriaceae	Granulicatella	NA	ASV_433
Bacteria	Actinobacteria	Actinobacteria	Corynebacteriales	Corynebacteriaceae	Corynebacterium 1	uous_taxa	ASV_435
Bacteria	Proteobacteria	Gammaproteobacteria	Pseudomonadales	Pseudomonadaceae	Pseudomonas	NA	ASV_436
Bacteria	Proteobacteria	Gammaproteobacteria	Betaproteobacteriales	Burkholderiaceae	Massilia	NA	ASV_438
Bacteria	Actinobacteria	Actinobacteria	Micrococcales	Micrococcaceae	Kocuria	NA	ASV_439
Bacteria	Firmicutes	Bacilli	Bacillales	Bacillaceae	Bacillus	Bacillus gibsonii	ASV_440
Bacteria	Actinobacteria	Actinobacteria	Streptomycetales	Streptomycetaceae	Streptomyces	NA	ASV_441
Bacteria	Actinobacteria	Actinobacteria	Frankiales	Geodermatophilaceae	Blastococcus	NA	ASV_442
Bacteria	Actinobacteria	Actinobacteria	Streptomycetales	Streptomycetaceae	Streptomyces	NA	ASV_443
Bacteria	Actinobacteria	Actinobacteria	Corynebacteriales	Mycobacteriaceae	Mycobacterium	NA	ASV_444
Bacteria	Fibrobacteres	Fibrobacteria	Fibrobacterales	Fibrobacteraceae	Fibrobacter	uncultured bacterium	ASV_445
Bacteria	Proteobacteria	Gammaproteobacteria	Xanthomonadales	Xanthomonadaceae	Stenotrophomonas	Stenotrophomonas acidaminiphila	ASV_446
Bacteria	Proteobacteria	Gammaproteobacteria	Betaproteobacteriales	Burkholderiaceae	Variovorax	NA	ASV_447
Bacteria	Actinobacteria	Acidimicrobiia	Microtrichales	uncultured	uncultured Actinomycetales bacterium	uncultured Actinomycetales bacterium	ASV_448
Bacteria	Proteobacteria	Alphaproteobacteria	Sphingomonadales	Sphingomonadaceae	Sphingomonas	Sphingomonas sp. FQM01	ASV_450
Bacteria	Fibrobacteres	Fibrobacteria	Fibrobacterales	Fibrobacteraceae	Fibrobacter	uncultured bacterium	ASV_451
Bacteria	Actinobacteria	Actinobacteria	Corynebacteriales	Nocardiaceae	Nocardia	NA	ASV_453
Bacteria	Firmicutes	Bacilli	Lactobacillales	Lactobacillaceae	NA	NA	ASV_454
Bacteria	Firmicutes	Bacilli	Lactobacillales	Aerococcaceae	Aerococcus	NA	ASV_455
Bacteria	Firmicutes	Bacilli	Bacillales	Bacillaceae	Fictibacillus	NA	ASV_457
Bacteria	Patescibacteria	Saccharimonadia	Saccharimonadales	NA	NA	NA	ASV_459
Bacteria	Actinobacteria	Actinobacteria	Micrococcales	Microbacteriaceae	Agrococcus	NA	ASV_461
Bacteria	Actinobacteria	Actinobacteria	Streptomycetales	Streptomycetaceae	NA	NA	ASV_462
Bacteria	Actinobacteria	Actinobacteria	Micrococcales	Microbacteriaceae	Microbacterium	NA	ASV_463
Bacteria	Actinobacteria	Actinobacteria	Corynebacteriales	Mycobacteriaceae	Mycobacterium	NA	ASV_464
Bacteria	Proteobacteria	Alphaproteobacteria	Rhizobiales	Devosiaceae	Devosia	NA	ASV_465
Bacteria	Actinobacteria	Actinobacteria	Corynebacteriales	Mycobacteriaceae	Mycobacterium	NA	ASV_466
Bacteria	Bacteroidetes	Bacteroidia	Sphingobacteriales	Sphingobacteriaceae	Pedobacter	NA	ASV_467
Bacteria	Firmicutes	Bacilli	Bacillales	Bacillaceae	Bacillus	NA	ASV_468
Bacteria	Proteobacteria	Gammaproteobacteria	Betaproteobacteriales	Burkholderiaceae	NA	NA	ASV_469
Bacteria	Proteobacteria	Alphaproteobacteria	Azospirillales	Azospirillaceae	Skermanella	NA	ASV_473
Bacteria	Proteobacteria	Gammaproteobacteria	Enterobacteriales	Enterobacteriaceae	Serratia	NA	ASV_474
Bacteria	Proteobacteria	Gammaproteobacteria	Enterobacteriales	Enterobacteriaceae	Pantoea	NA	ASV_475
Bacteria	Spirochaetes	Spirochaetia	Spirochaetales	Spirochaetaceae	Treponema 2	NA	ASV_477
Bacteria	Actinobacteria	Actinobacteria	Micrococcales	Microbacteriaceae	Microbacterium	NA	ASV_478
Bacteria	Firmicutes	Bacilli	Bacillales	Family XII	Exiguobacterium	NA	ASV_479
Bacteria	Firmicutes	Bacilli	Bacillales	Paenibacillaceae	Paenibacillus	NA	ASV_480
Bacteria	Actinobacteria	Actinobacteria	Corynebacteriales	Nocardiaceae	Smaragdicoccus	uncultured bacterium	ASV_482
Bacteria	Proteobacteria	Gammaproteobacteria	Oceanospirillales	Halomonadaceae	Zymobacter	uous_taxa	ASV_483
Bacteria	Proteobacteria	Gammaproteobacteria	Pseudomonadales	Moraxellaceae	Alkanindiges	NA	ASV_485
Bacteria	Actinobacteria	Actinobacteria	Streptomycetales	Streptomycetaceae	NA	NA	ASV_487
Bacteria	Proteobacteria	Gammaproteobacteria	Pseudomonadales	Moraxellaceae	Enhydrobacter	NA	ASV_488
Bacteria	Actinobacteria	Actinobacteria	Streptomycetales	Streptomycetaceae	Streptomyces	NA	ASV_489
Bacteria	Firmicutes	Clostridia	Clostridiales	Ruminococcaceae	Ruminococcus 1	NA	ASV_490
Bacteria	Proteobacteria	Gammaproteobacteria	Pseudomonadales	Pseudomonadaceae	Pseudomonas	NA	ASV_491
Bacteria	Firmicutes	Bacilli	Bacillales	Bacillaceae	Bacillus	NA	ASV_492
Bacteria	Actinobacteria	Thermoleophilia	Solirubrobacterales	Solirubrobacteraceae	Patulibacter	uous_taxa	ASV_495
Bacteria	Proteobacteria	Deltaproteobacteria	Myxococcales	Archangiaceae	uous_taxa	uous_taxa	ASV_496
Bacteria	Firmicutes	Clostridia	Clostridiales	Peptostreptococcaceae	Paeniclostridium	uncultured bacterium	ASV_498
Bacteria	Proteobacteria	Alphaproteobacteria	Sphingomonadales	Sphingomonadaceae	Sphingomonas	NA	ASV_499
Bacteria	Firmicutes	Bacilli	Bacillales	Alicyclobacillaceae	Tumebacillus	NA	ASV_501
Bacteria	Bacteroidetes	Bacteroidia	Cytophagales	Microscillaceae	Siphonobacter	uous_taxa	ASV_502
Bacteria	Actinobacteria	Actinobacteria	Micrococcales	Microbacteriaceae	Mycetocola	uous_taxa	ASV_503
Bacteria	Bacteroidetes	Bacteroidia	Flavobacteriales	Weeksellaceae	Chryseobacterium	NA	ASV_504
Bacteria	Firmicutes	Bacilli	Lactobacillales	Lactobacillaceae	Lactobacillus	NA	ASV_507
Bacteria	Bacteroidetes	Bacteroidia	Sphingobacteriales	Sphingobacteriaceae	Sphingobacterium	NA	ASV_508
Bacteria	Actinobacteria	Actinobacteria	Corynebacteriales	Nocardiaceae	Nocardia	NA	ASV_509
Bacteria	Firmicutes	Bacilli	Bacillales	Paenibacillaceae	Ammoniphilus	NA	ASV_510
Bacteria	Proteobacteria	Gammaproteobacteria	Betaproteobacteriales	Burkholderiaceae	Achromobacter	NA	ASV_511
Bacteria	Firmicutes	Bacilli	Lactobacillales	Leuconostocaceae	Weissella	NA	ASV_512
Bacteria	Firmicutes	Bacilli	Bacillales	Thermoactinomycetaceae	Trigonala elaeagnus	Trigonala elaeagnus	ASV_515
Bacteria	Actinobacteria	Actinobacteria	Propionibacteriales	Nocardioidaceae	Marmoricola	NA	ASV_518
Bacteria	Actinobacteria	Thermoleophilia	Solirubrobacterales	Solirubrobacteraceae	Solirubrobacter	NA	ASV_519
Bacteria	Bacteroidetes	Bacteroidia	Bacteroidales	Prevotellaceae	Alloprevotella	uncultured bacterium	ASV_521
Bacteria	Actinobacteria	Actinobacteria	Corynebacteriales	Corynebacteriaceae	Corynebacterium 1	uncultured organism	ASV_522
Bacteria	Firmicutes	Clostridia	Clostridiales	Family XI	Anaerococcus	uncultured organism	ASV_523
Bacteria	Proteobacteria	Alphaproteobacteria	Acetobacterales	Acetobacteraceae	Asaia	NA	ASV_524
Bacteria	Proteobacteria	Gammaproteobacteria	Betaproteobacteriales	Burkholderiaceae	Massilia	NA	ASV_525
Bacteria	Actinobacteria	Actinobacteria	Corynebacteriales	Mycobacteriaceae	Mycobacterium	NA	ASV_526
Bacteria	Proteobacteria	Alphaproteobacteria	Rhizobiales	Beijerinckiaceae	Microvirga	NA	ASV_527
Bacteria	Actinobacteria	Actinobacteria	Actinomycetales	Actinomycetaceae	Actinomyces	NA	ASV_528
Bacteria	Proteobacteria	Alphaproteobacteria	Rhizobiales	Labraceae	Labrys	NA	ASV_529
Bacteria	Firmicutes	Bacilli	Lactobacillales	Aerococcaceae	Facklamia	uous_taxa	ASV_530
Bacteria	Proteobacteria	Gammaproteobacteria	Betaproteobacteriales	Burkholderiaceae	NA	NA	ASV_532
Bacteria	Proteobacteria	Alphaproteobacteria	Rhizobiales	Rhizobiaceae	Ochrobactrum	NA	ASV_533
Bacteria	Actinobacteria	Actinobacteria	Streptomycetales	Streptomycetaceae	Streptomyces	NA	ASV_538
Bacteria	Proteobacteria	Gammaproteobacteria	Pseudomonadales	Pseudomonadaceae	Pseudomonas	NA	ASV_540
Bacteria	Bacteroidetes	Bacteroidia	Bacteroidales	p-251-o5	uncultured bacterium	uncultured bacterium	ASV_542
Bacteria	Proteobacteria	Gammaproteobacteria	Pseudomonadales	Pseudomonadaceae	Pseudomonas	NA	ASV_543
Bacteria	Proteobacteria	Alphaproteobacteria	Rhizobiales	Rhizobiaceae	Aureimonas	Aureimonas frigidaquae	ASV_544
Bacteria	Actinobacteria	Actinobacteria	Propionibacteriales	Nocardioidaceae	Nocardioides	NA	ASV_545
Bacteria	Firmicutes	Bacilli	Bacillales	Paenibacillaceae	Paenibacillus	NA	ASV_547
Bacteria	Firmicutes	Bacilli	Lactobacillales	Leuconostocaceae	Weissella	NA	ASV_549
Bacteria	Actinobacteria	Actinobacteria	Propionibacteriales	Nocardioidaceae	Nocardioides	NA	ASV_550
Bacteria	Firmicutes	Bacilli	Lactobacillales	Enterococcaceae	Enterococcus	NA	ASV_551
Bacteria	Proteobacteria	Alphaproteobacteria	Rhizobiales	Devosiaceae	Devosia	NA	ASV_552
Bacteria	Bacteroidetes	Bacteroidia	Bacteroidales	F082	uncultured bacterium	uncultured bacterium	ASV_554
Bacteria	Firmicutes	Bacilli	Lactobacillales	Leuconostocaceae	Weissella	NA	ASV_555
Bacteria	Proteobacteria	Alphaproteobacteria	Sphingomonadales	Sphingomonadaceae	Sphingomonas	NA	ASV_556
Bacteria	Bacteroidetes	Bacteroidia	Sphingobacteriales	Sphingobacteriaceae	Sphingobacterium	Caenorhabditis elegans	ASV_557
Bacteria	Firmicutes	Bacilli	Bacillales	NA	NA	NA	ASV_558
Bacteria	Actinobacteria	Actinobacteria	Micrococcales	Intrasporangiaceae	NA	NA	ASV_559
Bacteria	Actinobacteria	Thermoleophilia	Gaiellales	Gaiellaceae	Gaiella	actinobacterium WWH12	ASV_560
Bacteria	Bacteroidetes	Bacteroidia	Chitinophagales	Chitinophagaceae	Vibrionimonas	uncultured bacterium	ASV_561
Bacteria	Proteobacteria	Gammaproteobacteria	Betaproteobacteriales	Burkholderiaceae	Pseudorhodoferax	NA	ASV_562
Bacteria	Proteobacteria	Gammaproteobacteria	Enterobacteriales	Enterobacteriaceae	NA	NA	ASV_563
Bacteria	Bacteroidetes	Bacteroidia	Sphingobacteriales	Sphingobacteriaceae	Pedobacter	NA	ASV_564
Bacteria	Actinobacteria	Actinobacteria	Micrococcales	Microbacteriaceae	NA	NA	ASV_565
Bacteria	Proteobacteria	Gammaproteobacteria	Aeromonadales	Aeromonadaceae	Oceanisphaera	uncultured bacterium	ASV_566
Bacteria	Actinobacteria	Actinobacteria	Micrococcales	Dermabacteraceae	Brachybacterium	NA	ASV_567
Bacteria	Actinobacteria	Actinobacteria	Corynebacteriales	Corynebacteriaceae	Corynebacterium	NA	ASV_568
Bacteria	Firmicutes	Bacilli	Bacillales	Bacillaceae	Bacillus	NA	ASV_569
Bacteria	Actinobacteria	Actinobacteria	Micrococcales	Micrococcaceae	NA	NA	ASV_570
Bacteria	Proteobacteria	Gammaproteobacteria	Xanthomonadales	Xanthomonadaceae	Lysobacter	NA	ASV_571
Bacteria	Proteobacteria	Alphaproteobacteria	Acetobacterales	Acetobacteraceae	Roseomonas	uous_taxa	ASV_572
Bacteria	Actinobacteria	Actinobacteria	Micrococcales	Intrasporangiaceae	NA	NA	ASV_573
Bacteria	Bacteroidetes	Bacteroidia	Cytophagales	Hymenobacteraceae	Adhaeribacter	uncultured bacterium	ASV_574
Bacteria	Firmicutes	Bacilli	Bacillales	Paenibacillaceae	Paenibacillus	Paenibacillus granivorans	ASV_576
Bacteria	Bacteroidetes	Bacteroidia	Chitinophagales	Chitinophagaceae	Asinibacterium	uncultured bacterium	ASV_577
Bacteria	Proteobacteria	Alphaproteobacteria	Sphingomonadales	Sphingomonadaceae	Sphingomonas	NA	ASV_578
Bacteria	Chloroflexi	KD4-96	uous_taxa	uous_taxa	uous_taxa	uous_taxa	ASV_580
Bacteria	Bacteroidetes	Bacteroidia	Bacteroidales	F082	uncultured bacterium	uncultured bacterium	ASV_581
Bacteria	Proteobacteria	Gammaproteobacteria	Pseudomonadales	Pseudomonadaceae	Pseudomonas	NA	ASV_582
Bacteria	Actinobacteria	Actinobacteria	Corynebacteriales	Mycobacteriaceae	Mycobacterium	NA	ASV_583
Bacteria	Proteobacteria	Alphaproteobacteria	Acetobacterales	Acetobacteraceae	Gluconobacter	NA	ASV_585
Bacteria	Proteobacteria	Gammaproteobacteria	Enterobacteriales	Enterobacteriaceae	NA	NA	ASV_586
Bacteria	Firmicutes	Bacilli	Bacillales	Bacillaceae	Bacillus	NA	ASV_587
Bacteria	Patescibacteria	Saccharimonadia	Saccharimonadales	uncultured cyanobacterium	uncultured cyanobacterium	uncultured cyanobacterium	ASV_588
Bacteria	Firmicutes	Clostridia	Clostridiales	Lachnospiraceae	Acetitomaculum	uncultured bacterium	ASV_590
Bacteria	Bacteroidetes	Bacteroidia	Sphingobacteriales	Sphingobacteriaceae	Mucilaginibacter	uncultured bacterium	ASV_592
Bacteria	Bacteroidetes	Bacteroidia	Flavobacteriales	Crocinitomicaceae	Fluviicola	NA	ASV_593
Bacteria	Firmicutes	Bacilli	Bacillales	Paenibacillaceae	Ammoniphilus	NA	ASV_595
Bacteria	Spirochaetes	Spirochaetia	Spirochaetales	Spirochaetaceae	Treponema 2	uncultured bacterium	ASV_596
Bacteria	Proteobacteria	Gammaproteobacteria	Betaproteobacteriales	Burkholderiaceae	NA	NA	ASV_597
Bacteria	Actinobacteria	Actinobacteria	Streptomycetales	Streptomycetaceae	Streptomyces	NA	ASV_598
Bacteria	Firmicutes	Bacilli	Bacillales	Paenibacillaceae	Paenibacillus	NA	ASV_599
Bacteria	Deinococcus-Thermus	Deinococci	Deinococcales	Deinococcaceae	Deinococcus	Deinococcus citri	ASV_600
Bacteria	Proteobacteria	Gammaproteobacteria	Pasteurellales	Pasteurellaceae	Pasteurella	NA	ASV_601
Bacteria	Firmicutes	Bacilli	Lactobacillales	Leuconostocaceae	Leuconostoc	Leuconostoc fallax	ASV_602
Bacteria	Proteobacteria	Alphaproteobacteria	Rhodobacterales	Rhodobacteraceae	Rubellimicrobium	NA	ASV_603
Bacteria	Bacteroidetes	Bacteroidia	Cytophagales	Hymenobacteraceae	Hymenobacter	uncultured bacterium	ASV_604
Bacteria	Actinobacteria	Actinobacteria	Micrococcales	Microbacteriaceae	Rathayibacter	uous_taxa	ASV_605
Bacteria	Firmicutes	Bacilli	Bacillales	Bacillaceae	Bacillus	NA	ASV_606
Bacteria	Firmicutes	Clostridia	Clostridiales	Clostridiaceae 1	Clostridium sensu stricto 1	uncultured bacterium	ASV_607
Bacteria	Actinobacteria	Actinobacteria	Micrococcales	Micrococcaceae	Rothia	NA	ASV_608
Bacteria	Actinobacteria	Actinobacteria	Micrococcales	Dermabacteraceae	Brachybacterium	NA	ASV_609
Bacteria	Proteobacteria	Gammaproteobacteria	Betaproteobacteriales	Burkholderiaceae	Janthinobacterium	NA	ASV_611
Bacteria	Proteobacteria	Alphaproteobacteria	Acetobacterales	Acetobacteraceae	Roseomonas	NA	ASV_612
Bacteria	Bacteroidetes	Bacteroidia	Sphingobacteriales	Sphingobacteriaceae	Nubsella	uncultured bacterium	ASV_616
Bacteria	Proteobacteria	Alphaproteobacteria	Rhizobiales	Devosiaceae	Devosia	NA	ASV_617
Bacteria	Proteobacteria	Gammaproteobacteria	Betaproteobacteriales	Burkholderiaceae	NA	NA	ASV_618
Bacteria	Firmicutes	Bacilli	Bacillales	Staphylococcaceae	Salinicoccus	Salinicoccus roseus	ASV_619
Bacteria	Proteobacteria	Alphaproteobacteria	Sphingomonadales	Sphingomonadaceae	Sphingomonas	NA	ASV_620
Bacteria	Proteobacteria	Alphaproteobacteria	Rhizobiales	Devosiaceae	Devosia	NA	ASV_622
Bacteria	Proteobacteria	Gammaproteobacteria	Betaproteobacteriales	Burkholderiaceae	Ralstonia	NA	ASV_623
Bacteria	Fibrobacteres	Fibrobacteria	Fibrobacterales	Fibrobacteraceae	Fibrobacter	NA	ASV_625
Bacteria	Actinobacteria	Actinobacteria	Micrococcales	Dermabacteraceae	Brachybacterium	NA	ASV_626
Bacteria	Actinobacteria	Actinobacteria	Micrococcales	Micrococcaceae	Arthrobacter	NA	ASV_627
Bacteria	Proteobacteria	Alphaproteobacteria	Rhizobiales	Kaistiaceae	Kaistia	NA	ASV_628
Bacteria	Firmicutes	Bacilli	Bacillales	Bacillaceae	Tepidibacillus	uous_taxa	ASV_630
Bacteria	Firmicutes	Bacilli	Bacillales	Paenibacillaceae	Saccharibacillus	uous_taxa	ASV_632
Bacteria	Actinobacteria	Actinobacteria	Propionibacteriales	Nocardioidaceae	Nocardioides	NA	ASV_633
Bacteria	Bacteroidetes	Bacteroidia	Cytophagales	Hymenobacteraceae	Hymenobacter	NA	ASV_634
Bacteria	Proteobacteria	Gammaproteobacteria	Pseudomonadales	Pseudomonadaceae	Pseudomonas	NA	ASV_635
Bacteria	Firmicutes	Clostridia	Clostridiales	Lachnospiraceae	Lachnospiraceae UCG-009	uncultured bacterium	ASV_636
Bacteria	Proteobacteria	Gammaproteobacteria	Enterobacteriales	Enterobacteriaceae	NA	NA	ASV_638
Bacteria	Actinobacteria	Actinobacteria	Propionibacteriales	Nocardioidaceae	Aeromicrobium	NA	ASV_639
Bacteria	Proteobacteria	Gammaproteobacteria	Betaproteobacteriales	Burkholderiaceae	Massilia	NA	ASV_640
Bacteria	Proteobacteria	Gammaproteobacteria	Oceanospirillales	Alcanivoracaceae	Alcanivorax	NA	ASV_641
Bacteria	Proteobacteria	Gammaproteobacteria	Enterobacteriales	Enterobacteriaceae	NA	NA	ASV_642
Bacteria	Firmicutes	Clostridia	Clostridiales	Family XIII	Family XIII AD3011 group	NA	ASV_643
Bacteria	Cyanobacteria	Oxyphotobacteria	Nostocales	Nostocaceae	Tolypothrix PCC-7601	uous_taxa	ASV_644
Bacteria	Proteobacteria	Alphaproteobacteria	Sphingomonadales	Sphingomonadaceae	Sphingomonas	NA	ASV_645
Bacteria	Proteobacteria	Alphaproteobacteria	Azospirillales	Azospirillaceae	Skermanella	NA	ASV_646
Bacteria	Bacteroidetes	Bacteroidia	Cytophagales	Hymenobacteraceae	Hymenobacter	NA	ASV_647
Bacteria	Firmicutes	Erysipelotrichia	Erysipelotrichales	Erysipelotrichaceae	Erysipelotrichaceae UCG-004	uncultured rumen bacterium	ASV_648
Bacteria	Firmicutes	Bacilli	Bacillales	Paenibacillaceae	Paenibacillus	Paenibacillus turicensis	ASV_649
Bacteria	Proteobacteria	Alphaproteobacteria	Rhizobiales	Beijerinckiaceae	Microvirga	NA	ASV_650
Bacteria	Actinobacteria	Actinobacteria	Propionibacteriales	Nocardioidaceae	Nocardioides	NA	ASV_651
Bacteria	Actinobacteria	Actinobacteria	Micrococcales	Intrasporangiaceae	NA	NA	ASV_652
Bacteria	Actinobacteria	Acidimicrobiia	IMCC26256	NA	NA	NA	ASV_653
Bacteria	Bacteroidetes	Bacteroidia	Flavobacteriales	Flavobacteriaceae	Flavobacterium	Flavobacterium johnsoniae	ASV_654
Bacteria	Actinobacteria	Actinobacteria	Micrococcales	Microbacteriaceae	Frigoribacterium	NA	ASV_655
Bacteria	Actinobacteria	Actinobacteria	Pseudonocardiales	Pseudonocardiaceae	Actinomycetospora	uncultured bacterium	ASV_656
Bacteria	Firmicutes	Clostridia	Clostridiales	Lachnospiraceae	uncultured	NA	ASV_661
Bacteria	Bacteroidetes	Bacteroidia	Cytophagales	Hymenobacteraceae	Hymenobacter	uncultured bacterium	ASV_664
Bacteria	Proteobacteria	Gammaproteobacteria	Betaproteobacteriales	Burkholderiaceae	Massilia	NA	ASV_666
Bacteria	Firmicutes	Clostridia	Clostridiales	Lachnospiraceae	Lachnospiraceae UCG-009	NA	ASV_667
Bacteria	Actinobacteria	Actinobacteria	Pseudonocardiales	Pseudonocardiaceae	Umezawaea	uous_taxa	ASV_668
Bacteria	Bacteroidetes	Bacteroidia	Flavobacteriales	Weeksellaceae	Chryseobacterium	NA	ASV_669
Bacteria	Proteobacteria	Gammaproteobacteria	Xanthomonadales	Rhodanobacteraceae	Dokdonella	NA	ASV_670
Bacteria	Bacteroidetes	Bacteroidia	Chitinophagales	Chitinophagaceae	Cnuella	uous_taxa	ASV_671
Bacteria	Actinobacteria	Actinobacteria	Corynebacteriales	Corynebacteriaceae	Corynebacterium 1	Corynebacterium afermentans subsp. afermentans	ASV_673
Bacteria	Proteobacteria	Alphaproteobacteria	Sphingomonadales	Sphingomonadaceae	Sphingopyxis	NA	ASV_674
Bacteria	Actinobacteria	Actinobacteria	Micrococcales	Microbacteriaceae	Clavibacter	NA	ASV_675
Bacteria	Actinobacteria	Actinobacteria	Propionibacteriales	Nocardioidaceae	Nocardioides	NA	ASV_676
Bacteria	Proteobacteria	Gammaproteobacteria	Xanthomonadales	Rhodanobacteraceae	Luteibacter	uous_taxa	ASV_677
Bacteria	Proteobacteria	Alphaproteobacteria	Rhodospirillales	uncultured	metagenome	metagenome	ASV_678
Bacteria	Proteobacteria	Gammaproteobacteria	Enterobacteriales	Enterobacteriaceae	NA	NA	ASV_679
Bacteria	Firmicutes	Bacilli	Bacillales	Paenibacillaceae	Saccharibacillus	uncultured bacterium	ASV_680
Bacteria	Firmicutes	Bacilli	Lactobacillales	Leuconostocaceae	Weissella	NA	ASV_681
Bacteria	Proteobacteria	NA	NA	NA	NA	NA	ASV_682
Bacteria	Actinobacteria	Actinobacteria	Corynebacteriales	Mycobacteriaceae	Mycobacterium	NA	ASV_684
Bacteria	Firmicutes	Clostridia	Clostridiales	Ruminococcaceae	Ruminococcaceae UCG-005	NA	ASV_685
Bacteria	Bacteroidetes	Bacteroidia	Bacteroidales	Bacteroidales UCG-001	NA	NA	ASV_687
Bacteria	Actinobacteria	Actinobacteria	Micrococcales	Microbacteriaceae	Microbacterium	NA	ASV_688
Bacteria	Firmicutes	Clostridia	Clostridiales	Peptostreptococcaceae	Peptoclostridium	uncultured bacterium	ASV_689
Bacteria	Firmicutes	Bacilli	Bacillales	Paenibacillaceae	Paenibacillus	NA	ASV_690
Bacteria	Actinobacteria	Actinobacteria	Micrococcales	Intrasporangiaceae	Aquipuribacter	uncultured bacterium	ASV_691
Bacteria	Bacteroidetes	Bacteroidia	Cytophagales	Hymenobacteraceae	Hymenobacter	uncultured bacterium	ASV_692
Bacteria	Proteobacteria	Alphaproteobacteria	Rhizobiales	Rhizobiaceae	Aureimonas	NA	ASV_693
Bacteria	Proteobacteria	Alphaproteobacteria	Rhizobiales	Beijerinckiaceae	Methylobacterium	NA	ASV_694
Bacteria	Firmicutes	Bacilli	Bacillales	Bacillaceae	Bacillus	NA	ASV_695
Bacteria	Proteobacteria	Gammaproteobacteria	Betaproteobacteriales	Burkholderiaceae	Variovorax	NA	ASV_697
Bacteria	Actinobacteria	Actinobacteria	Corynebacteriales	Corynebacteriaceae	Corynebacterium 1	NA	ASV_698
Bacteria	Proteobacteria	Deltaproteobacteria	Myxococcales	BIrii41	NA	NA	ASV_700
Bacteria	Proteobacteria	Alphaproteobacteria	Rhizobiales	Rhizobiaceae	Shinella	NA	ASV_702
Bacteria	Proteobacteria	Gammaproteobacteria	Betaproteobacteriales	Burkholderiaceae	NA	NA	ASV_704
Bacteria	Actinobacteria	Actinobacteria	Kineosporiales	Kineosporiaceae	Pseudokineococcus	uous_taxa	ASV_706
Bacteria	Actinobacteria	Actinobacteria	Micrococcales	Cellulomonadaceae	Cellulomonas	NA	ASV_707
Bacteria	Bacteroidetes	Bacteroidia	Sphingobacteriales	Sphingobacteriaceae	Pedobacter	NA	ASV_708
Bacteria	Actinobacteria	Thermoleophilia	Solirubrobacterales	Solirubrobacteraceae	Solirubrobacter	NA	ASV_709
Bacteria	Bacteroidetes	Bacteroidia	Bacteroidales	Rikenellaceae	Rikenellaceae RC9 gut group	uncultured bacterium	ASV_710
Bacteria	Bacteroidetes	Bacteroidia	Bacteroidales	F082	NA	NA	ASV_711
Bacteria	Firmicutes	Clostridia	Clostridiales	Lachnospiraceae	Lachnospiraceae AC2044 group	NA	ASV_712
Bacteria	Bacteroidetes	Bacteroidia	Bacteroidales	F082	uncultured rumen bacterium	uncultured rumen bacterium	ASV_713
Bacteria	Proteobacteria	Alphaproteobacteria	Rhizobiales	Rhizobiaceae	Allorhizobium-Neorhizobium-Pararhizobium-Rhizobium	NA	ASV_714
Bacteria	Firmicutes	Clostridia	Clostridiales	Family XI	Peptoniphilus	uncultured organism	ASV_715
Bacteria	Firmicutes	Bacilli	Lactobacillales	Lactobacillaceae	Lactobacillus	Lactobacillus micheneri	ASV_717
Bacteria	Proteobacteria	Gammaproteobacteria	Enterobacteriales	Enterobacteriaceae	Proteus	NA	ASV_719
Bacteria	Actinobacteria	Actinobacteria	Corynebacteriales	Nocardiaceae	Nocardia	uous_taxa	ASV_720
Bacteria	Proteobacteria	Alphaproteobacteria	Rhizobiales	Rhizobiaceae	NA	NA	ASV_721
Bacteria	Proteobacteria	Alphaproteobacteria	Sphingomonadales	Sphingomonadaceae	Sphingomonas	NA	ASV_722
Bacteria	Actinobacteria	Thermoleophilia	Solirubrobacterales	67-14	uncultured Rubrobacteria bacterium	uncultured Rubrobacteria bacterium	ASV_724
Bacteria	Firmicutes	Clostridia	Clostridiales	Family XI	Finegoldia	NA	ASV_725
Bacteria	Actinobacteria	Actinobacteria	Corynebacteriales	Mycobacteriaceae	Mycobacterium	NA	ASV_727
Bacteria	Firmicutes	Bacilli	Lactobacillales	Streptococcaceae	Streptococcus	NA	ASV_728
Bacteria	Tenericutes	Mollicutes	Mollicutes RF39	NA	NA	NA	ASV_729
Bacteria	Proteobacteria	Gammaproteobacteria	Betaproteobacteriales	Burkholderiaceae	Herminiimonas	NA	ASV_730
Bacteria	Actinobacteria	Actinobacteria	Corynebacteriales	Nocardiaceae	Nocardia	NA	ASV_731
Bacteria	Bacteroidetes	Bacteroidia	Chitinophagales	Chitinophagaceae	Taibaiella	uous_taxa	ASV_732
Bacteria	Firmicutes	Bacilli	Bacillales	Paenibacillaceae	Paenibacillus	uncultured Firmicutes bacterium	ASV_733
Bacteria	Proteobacteria	Alphaproteobacteria	Rhizobiales	Beijerinckiaceae	Qingshengfania	uous_taxa	ASV_734
Bacteria	Proteobacteria	Gammaproteobacteria	Betaproteobacteriales	Burkholderiaceae	Burkholderia-Caballeronia-Paraburkholderia	NA	ASV_736
Bacteria	Actinobacteria	Thermoleophilia	Solirubrobacterales	Solirubrobacteraceae	Solirubrobacter	NA	ASV_737
Bacteria	Proteobacteria	Gammaproteobacteria	Pseudomonadales	Pseudomonadaceae	Azotobacter	NA	ASV_739
Bacteria	Proteobacteria	Alphaproteobacteria	Rhizobiales	Beijerinckiaceae	Microvirga	NA	ASV_743
Bacteria	Actinobacteria	Actinobacteria	Pseudonocardiales	Pseudonocardiaceae	NA	NA	ASV_744
Bacteria	Spirochaetes	MVP-15	NA	NA	NA	NA	ASV_745
Bacteria	Actinobacteria	Actinobacteria	Streptomycetales	Streptomycetaceae	Streptomyces	NA	ASV_746
Bacteria	Proteobacteria	Gammaproteobacteria	Enterobacteriales	Enterobacteriaceae	NA	NA	ASV_747
Bacteria	Proteobacteria	Gammaproteobacteria	Pseudomonadales	Moraxellaceae	Acinetobacter	NA	ASV_749
Bacteria	Actinobacteria	Actinobacteria	Corynebacteriales	Nocardiaceae	Smaragdicoccus	NA	ASV_750
Bacteria	Firmicutes	Clostridia	Clostridiales	Christensenellaceae	Christensenellaceae R-7 group	uous_taxa	ASV_753
Bacteria	Bacteroidetes	Bacteroidia	Bacteroidales	Rikenellaceae	Rikenellaceae RC9 gut group	uncultured bacterium	ASV_754
Bacteria	Bacteroidetes	Bacteroidia	Bacteroidales	Rikenellaceae	Rikenellaceae RC9 gut group	NA	ASV_755
Bacteria	Proteobacteria	Gammaproteobacteria	Betaproteobacteriales	Burkholderiaceae	Burkholderia-Caballeronia-Paraburkholderia	NA	ASV_756
Bacteria	Actinobacteria	Actinobacteria	Micrococcales	Microbacteriaceae	Microbacterium	NA	ASV_757
Bacteria	Proteobacteria	Gammaproteobacteria	Pseudomonadales	Pseudomonadaceae	Pseudomonas	NA	ASV_758
Bacteria	Actinobacteria	Actinobacteria	Kineosporiales	Kineosporiaceae	Kineococcus	NA	ASV_759
Bacteria	Actinobacteria	Actinobacteria	Micrococcales	Intrasporangiaceae	Terrabacter	uous_taxa	ASV_760
Bacteria	Actinobacteria	Actinobacteria	Catenulisporales	Catenulisporaceae	Catenulispora	Catenulispora sp.	ASV_761
Bacteria	Actinobacteria	Actinobacteria	Micrococcales	Micrococcaceae	Arthrobacter	NA	ASV_762
Bacteria	Actinobacteria	Actinobacteria	Micrococcales	Microbacteriaceae	NA	NA	ASV_763
Bacteria	Firmicutes	Clostridia	Clostridiales	Lachnospiraceae	Lachnospiraceae AC2044 group	uncultured bacterium	ASV_765
Bacteria	Proteobacteria	Alphaproteobacteria	Sphingomonadales	Sphingomonadaceae	Sphingomonas	NA	ASV_766
Bacteria	Proteobacteria	Gammaproteobacteria	Enterobacteriales	Enterobacteriaceae	NA	NA	ASV_767
Bacteria	Actinobacteria	Actinobacteria	Streptosporangiales	Thermomonosporaceae	Actinomadura	NA	ASV_768
Bacteria	Actinobacteria	Actinobacteria	Propionibacteriales	Nocardioidaceae	Nocardioides	NA	ASV_770
Bacteria	Actinobacteria	Actinobacteria	Propionibacteriales	Propionibacteriaceae	Friedmanniella	NA	ASV_771
Bacteria	Actinobacteria	Actinobacteria	Propionibacteriales	Nocardioidaceae	Nocardioides	Nocardioides panzhihuensis	ASV_774
Bacteria	Firmicutes	Clostridia	Clostridiales	Lachnospiraceae	Lachnoclostridium	Coptotermes gestroi	ASV_775
Bacteria	Firmicutes	Bacilli	Bacillales	Planococcaceae	Lysinibacillus	NA	ASV_776
Bacteria	Proteobacteria	Alphaproteobacteria	Sphingomonadales	Sphingomonadaceae	Sphingomonas	NA	ASV_777
Bacteria	Actinobacteria	Actinobacteria	Propionibacteriales	Nocardioidaceae	Marmoricola	NA	ASV_778
Bacteria	Proteobacteria	Gammaproteobacteria	Betaproteobacteriales	Burkholderiaceae	Massilia	NA	ASV_779
Bacteria	Bacteroidetes	Bacteroidia	Sphingobacteriales	Sphingobacteriaceae	NA	NA	ASV_780
Bacteria	Actinobacteria	Thermoleophilia	Solirubrobacterales	Solirubrobacteraceae	Solirubrobacter	NA	ASV_783
Bacteria	Bacteroidetes	Bacteroidia	Bacteroidales	Bacteroidales RF16 group	uncultured Porphyromonadaceae bacterium	uncultured Porphyromonadaceae bacterium	ASV_784
Bacteria	Spirochaetes	MVP-15	uncultured rumen bacterium	uncultured rumen bacterium	uncultured rumen bacterium	uncultured rumen bacterium	ASV_786
Bacteria	Firmicutes	Clostridia	Clostridiales	Christensenellaceae	Christensenellaceae R-7 group	uous_taxa	ASV_787
Bacteria	Firmicutes	Bacilli	Lactobacillales	Lactobacillaceae	Lactobacillus	NA	ASV_788
Bacteria	Bacteroidetes	Bacteroidia	Cytophagales	Spirosomaceae	Leadbetterella	NA	ASV_789
Bacteria	Bacteroidetes	Bacteroidia	Chitinophagales	Chitinophagaceae	Flavisolibacter	NA	ASV_790
Bacteria	Proteobacteria	Alphaproteobacteria	Rhizobiales	Methyloligellaceae	uncultured	uous_taxa	ASV_791
Bacteria	Firmicutes	Bacilli	Bacillales	Bacillaceae	Bacillus	NA	ASV_795
Bacteria	Firmicutes	Bacilli	Bacillales	Thermoactinomycetaceae	uncultured	uncultured bacterium	ASV_796
Bacteria	Bacteroidetes	Bacteroidia	Bacteroidales	F082	uncultured bacterium	uncultured bacterium	ASV_797
Bacteria	Firmicutes	Erysipelotrichia	Erysipelotrichales	Erysipelotrichaceae	Erysipelotrichaceae UCG-004	uncultured bacterium	ASV_798
Bacteria	Firmicutes	Bacilli	Bacillales	Staphylococcaceae	Jeotgalicoccus	NA	ASV_799
Bacteria	Bacteroidetes	Bacteroidia	Bacteroidales	Rikenellaceae	Rikenellaceae RC9 gut group	uncultured Rikenella sp.	ASV_800
Bacteria	Actinobacteria	Actinobacteria	Catenulisporales	Actinospicaceae	Actinospica	uous_taxa	ASV_801
Bacteria	Actinobacteria	Actinobacteria	Streptosporangiales	Nocardiopsaceae	Nocardiopsis	NA	ASV_802
Bacteria	Actinobacteria	Actinobacteria	Micrococcales	Microbacteriaceae	Microbacterium	NA	ASV_803
Bacteria	Actinobacteria	Thermoleophilia	Solirubrobacterales	67-14	uous_taxa	uous_taxa	ASV_804
Bacteria	Proteobacteria	Alphaproteobacteria	Rhizobiales	Rhizobiaceae	Allorhizobium-Neorhizobium-Pararhizobium-Rhizobium	NA	ASV_805
Bacteria	Proteobacteria	Alphaproteobacteria	Caulobacterales	Caulobacteraceae	uncultured	NA	ASV_806
Bacteria	Cyanobacteria	Oxyphotobacteria	Synechococcales	Cyanobiaceae	Cyanobium PCC-6307	NA	ASV_807
Bacteria	Proteobacteria	Gammaproteobacteria	Enterobacteriales	Enterobacteriaceae	Morganella	NA	ASV_808
Bacteria	Firmicutes	Bacilli	Bacillales	Paenibacillaceae	Paenibacillus	NA	ASV_811
Bacteria	Proteobacteria	Gammaproteobacteria	Betaproteobacteriales	Hydrogenophilaceae	Hydrogenophilus	uncultured bacterium	ASV_812
Bacteria	Actinobacteria	Actinobacteria	Propionibacteriales	Nocardioidaceae	Kribbella	uous_taxa	ASV_813
Bacteria	Actinobacteria	Actinobacteria	Pseudonocardiales	Pseudonocardiaceae	Pseudonocardia	NA	ASV_814
Bacteria	Actinobacteria	Thermoleophilia	Solirubrobacterales	Solirubrobacteraceae	Solirubrobacter	uncultured bacterium	ASV_815
Bacteria	Bacteroidetes	Bacteroidia	Bacteroidales	F082	NA	NA	ASV_820
Bacteria	Firmicutes	Clostridia	Clostridiales	Ruminococcaceae	Ruminococcaceae UCG-002	uncultured bacterium	ASV_821
Bacteria	Bacteroidetes	Bacteroidia	Bacteroidales	NA	NA	NA	ASV_822
Bacteria	Fibrobacteres	Fibrobacteria	Fibrobacterales	Fibrobacteraceae	Fibrobacter	uous_taxa	ASV_823
Bacteria	Firmicutes	Clostridia	Clostridiales	Lachnospiraceae	[Eubacterium] hallii group	uncultured Lachnospiraceae bacterium	ASV_824
Bacteria	Proteobacteria	Alphaproteobacteria	Caulobacterales	Caulobacteraceae	Brevundimonas	NA	ASV_825
Bacteria	Proteobacteria	Alphaproteobacteria	Rhodobacterales	Rhodobacteraceae	Rubellimicrobium	uncultured bacterium	ASV_826
Bacteria	Bacteroidetes	Bacteroidia	Cytophagales	Hymenobacteraceae	Adhaeribacter	NA	ASV_827
Bacteria	Actinobacteria	Actinobacteria	Micrococcales	Micrococcaceae	Glutamicibacter	NA	ASV_829
Bacteria	Actinobacteria	Actinobacteria	Corynebacteriales	Nocardiaceae	Nocardia	uous_taxa	ASV_830
Bacteria	Actinobacteria	Actinobacteria	Micromonosporales	Micromonosporaceae	NA	NA	ASV_832
Bacteria	Firmicutes	Clostridia	Clostridiales	Christensenellaceae	Christensenellaceae R-7 group	uncultured rumen bacterium	ASV_834
Bacteria	Actinobacteria	Actinobacteria	Frankiales	Nakamurellaceae	Nakamurella	NA	ASV_836
Bacteria	Bacteroidetes	Bacteroidia	Flavobacteriales	Weeksellaceae	Moheibacter	Empedobacter sp. C2-7	ASV_837
Bacteria	Actinobacteria	Actinobacteria	Propionibacteriales	Nocardioidaceae	Aeromicrobium	uous_taxa	ASV_838
Bacteria	Firmicutes	Clostridia	Clostridiales	Peptostreptococcaceae	NA	NA	ASV_839
Bacteria	Proteobacteria	Gammaproteobacteria	Betaproteobacteriales	Burkholderiaceae	Polaromonas	NA	ASV_841
Bacteria	Actinobacteria	Actinobacteria	Propionibacteriales	Propionibacteriaceae	Microlunatus	uous_taxa	ASV_842
Bacteria	Firmicutes	Bacilli	Lactobacillales	Streptococcaceae	Streptococcus	Streptococcus devriesei	ASV_843
Bacteria	Actinobacteria	Actinobacteria	Propionibacteriales	Propionibacteriaceae	Cutibacterium	NA	ASV_844
Bacteria	Actinobacteria	Actinobacteria	Micrococcales	Dermacoccaceae	Flexivirga	uous_taxa	ASV_845
Bacteria	Actinobacteria	Actinobacteria	Micrococcales	Micrococcaceae	NA	NA	ASV_846
Bacteria	Proteobacteria	Alphaproteobacteria	Rhizobiales	Methyloligellaceae	uous_taxa	uous_taxa	ASV_847
Bacteria	Proteobacteria	Alphaproteobacteria	Sphingomonadales	Sphingomonadaceae	Qipengyuania	NA	ASV_848
Bacteria	Bacteroidetes	Bacteroidia	Chitinophagales	Chitinophagaceae	uncultured	Chitinophaga sp. BN130233	ASV_850
Bacteria	Cyanobacteria	Sericytochromatia	NA	NA	NA	NA	ASV_852
Bacteria	Actinobacteria	Actinobacteria	Corynebacteriales	Nocardiaceae	Nocardia	NA	ASV_853
Bacteria	Bacteroidetes	Bacteroidia	Bacteroidales	Marinifilaceae	uncultured	uncultured rumen bacterium	ASV_854
Bacteria	Firmicutes	Bacilli	Bacillales	Staphylococcaceae	Staphylococcus	NA	ASV_855
Bacteria	Proteobacteria	Gammaproteobacteria	Pseudomonadales	Pseudomonadaceae	Pseudomonas	NA	ASV_856
Bacteria	Actinobacteria	Actinobacteria	Pseudonocardiales	Pseudonocardiaceae	Lechevalieria	uous_taxa	ASV_857
Bacteria	Proteobacteria	Alphaproteobacteria	Sphingomonadales	Sphingomonadaceae	Sphingobium	NA	ASV_858
Bacteria	Actinobacteria	Actinobacteria	Glycomycetales	Glycomycetaceae	Glycomyces	NA	ASV_859
Bacteria	Chloroflexi	TK10	uous_taxa	uous_taxa	uous_taxa	uous_taxa	ASV_860
Bacteria	Bacteroidetes	Bacteroidia	Flavobacteriales	Weeksellaceae	Chryseobacterium	NA	ASV_863
Bacteria	Firmicutes	Clostridia	Clostridiales	Christensenellaceae	Christensenellaceae R-7 group	NA	ASV_864
Bacteria	Proteobacteria	Alphaproteobacteria	Sphingomonadales	Sphingomonadaceae	Sphingomonas	NA	ASV_865
Bacteria	Actinobacteria	Actinobacteria	Micrococcales	Intrasporangiaceae	NA	NA	ASV_866
Bacteria	Actinobacteria	Actinobacteria	Streptomycetales	Streptomycetaceae	Streptomyces	NA	ASV_867
Bacteria	Actinobacteria	Actinobacteria	Micrococcales	Micrococcaceae	Rothia	uncultured bacterium	ASV_868
Bacteria	Actinobacteria	Actinobacteria	Propionibacteriales	Nocardioidaceae	Aeromicrobium	uous_taxa	ASV_870
Bacteria	Actinobacteria	Thermoleophilia	Solirubrobacterales	Solirubrobacteraceae	Patulibacter	uous_taxa	ASV_871
Bacteria	Proteobacteria	Alphaproteobacteria	Rhizobiales	Devosiaceae	Devosia	NA	ASV_872
Bacteria	Actinobacteria	Actinobacteria	Actinomycetales	Actinomycetaceae	Actinomyces	NA	ASV_877
Bacteria	Actinobacteria	Actinobacteria	Corynebacteriales	Nocardiaceae	Rhodococcus	Rhodococcus corynebacterioides	ASV_878
Bacteria	Bacteroidetes	Bacteroidia	Bacteroidales	Bacteroidales BS11 gut group	uncultured bacterium	uncultured bacterium	ASV_880
Bacteria	Bacteroidetes	Bacteroidia	Bacteroidales	F082	uncultured bacterium	uncultured bacterium	ASV_881
Bacteria	Bacteroidetes	Bacteroidia	Bacteroidales	Marinifilaceae	uncultured	uncultured rumen bacterium	ASV_884
Bacteria	Proteobacteria	Gammaproteobacteria	Xanthomonadales	Xanthomonadaceae	Xanthomonas	NA	ASV_885
Bacteria	Proteobacteria	Alphaproteobacteria	Sphingomonadales	Sphingomonadaceae	Sphingomonas	NA	ASV_887
Bacteria	Proteobacteria	Alphaproteobacteria	Acetobacterales	Acetobacteraceae	Roseomonas	NA	ASV_888
Bacteria	Firmicutes	Negativicutes	Selenomonadales	Veillonellaceae	Veillonella	NA	ASV_889
Bacteria	Actinobacteria	Actinobacteria	Streptomycetales	Streptomycetaceae	Streptomyces	NA	ASV_890
Bacteria	Firmicutes	Bacilli	Bacillales	Planococcaceae	Domibacillus	uous_taxa	ASV_893
Bacteria	Actinobacteria	Actinobacteria	Corynebacteriales	Mycobacteriaceae	Mycobacterium	NA	ASV_894
Bacteria	Firmicutes	Bacilli	Bacillales	Bacillaceae	Bacillus	NA	ASV_895
Bacteria	Actinobacteria	Actinobacteria	Corynebacteriales	Corynebacteriaceae	NA	NA	ASV_896
Bacteria	Bacteroidetes	Bacteroidia	Bacteroidales	Bacteroidales RF16 group	uncultured rumen bacterium	uncultured rumen bacterium	ASV_897
Bacteria	Firmicutes	Clostridia	Clostridiales	Lachnospiraceae	Lachnospiraceae XPB1014 group	uncultured bacterium	ASV_898
Bacteria	Firmicutes	Clostridia	Clostridiales	Clostridiaceae 1	Clostridium sensu stricto 1	NA	ASV_899
Bacteria	Firmicutes	Bacilli	Bacillales	Paenibacillaceae	Paenibacillus	NA	ASV_900
Bacteria	Firmicutes	Bacilli	Lactobacillales	Lactobacillaceae	Lactobacillus	NA	ASV_901
Bacteria	Actinobacteria	Actinobacteria	Micrococcales	Microbacteriaceae	NA	NA	ASV_902
Bacteria	Proteobacteria	Gammaproteobacteria	Pseudomonadales	Moraxellaceae	Acinetobacter	NA	ASV_904
Bacteria	Proteobacteria	Deltaproteobacteria	Myxococcales	P3OB-42	uncultured bacterium	uncultured bacterium	ASV_905
Bacteria	Actinobacteria	Actinobacteria	Propionibacteriales	Nocardioidaceae	Nocardioides	NA	ASV_907
Bacteria	Firmicutes	Clostridia	Clostridiales	Family XI	Anaerococcus	uncultured Anaerococcus sp.	ASV_908
Bacteria	Proteobacteria	Alphaproteobacteria	Acetobacterales	Acetobacteraceae	uncultured	NA	ASV_909
Bacteria	Firmicutes	Negativicutes	Selenomonadales	Veillonellaceae	Veillonella	NA	ASV_910
Bacteria	Actinobacteria	Thermoleophilia	Gaiellales	uncultured	uncultured bacterium	uncultured bacterium	ASV_913
Bacteria	Firmicutes	Clostridia	Clostridiales	Clostridiaceae 1	Clostridium sensu stricto 12	Clostridium magnum	ASV_914
Bacteria	Actinobacteria	Actinobacteria	Propionibacteriales	Nocardioidaceae	Nocardioides	NA	ASV_915
Bacteria	Proteobacteria	Gammaproteobacteria	Betaproteobacteriales	Burkholderiaceae	NA	NA	ASV_916
Bacteria	Firmicutes	Clostridia	Clostridiales	Lachnospiraceae	XBB1006	uncultured rumen bacterium	ASV_917
Bacteria	Actinobacteria	Actinobacteria	Micrococcales	Microbacteriaceae	Microbacterium	NA	ASV_919
Bacteria	Firmicutes	Bacilli	Bacillales	Planococcaceae	NA	NA	ASV_920
Bacteria	Proteobacteria	Alphaproteobacteria	Rhizobiales	Beijerinckiaceae	Microvirga	NA	ASV_922
Bacteria	Actinobacteria	Actinobacteria	Micrococcales	Micrococcaceae	Kocuria	NA	ASV_923
Bacteria	Proteobacteria	Gammaproteobacteria	Betaproteobacteriales	Burkholderiaceae	Noviherbaspirillum	NA	ASV_924
Bacteria	Bacteroidetes	Bacteroidia	Chitinophagales	Chitinophagaceae	Taibaiella	uous_taxa	ASV_925
Bacteria	Bacteroidetes	Bacteroidia	Bacteroidales	Prevotellaceae	Prevotella 7	Prevotella melaninogenica	ASV_927
Bacteria	Proteobacteria	Alphaproteobacteria	Caulobacterales	Caulobacteraceae	Brevundimonas	NA	ASV_929
Bacteria	Actinobacteria	Actinobacteria	Micromonosporales	Micromonosporaceae	Actinoplanes	NA	ASV_931
Bacteria	Bacteroidetes	Bacteroidia	Chitinophagales	Chitinophagaceae	Taibaiella	NA	ASV_932
Bacteria	Bacteroidetes	Bacteroidia	Bacteroidales	F082	uncultured bacterium	uncultured bacterium	ASV_933
Bacteria	Firmicutes	Bacilli	Bacillales	Staphylococcaceae	Salinicoccus	NA	ASV_934
Bacteria	Bacteroidetes	Bacteroidia	Bacteroidales	Rikenellaceae	Rikenellaceae RC9 gut group	uncultured bacterium	ASV_935
Bacteria	Proteobacteria	Gammaproteobacteria	Xanthomonadales	Rhodanobacteraceae	Luteibacter	NA	ASV_936
Bacteria	Actinobacteria	Thermoleophilia	Solirubrobacterales	67-14	NA	NA	ASV_941
Bacteria	Actinobacteria	Thermoleophilia	Gaiellales	uncultured	NA	NA	ASV_947
Bacteria	Actinobacteria	Actinobacteria	Propionibacteriales	Nocardioidaceae	Nocardioides	metagenome	ASV_949
Bacteria	Chloroflexi	KD4-96	uous_taxa	uous_taxa	uous_taxa	uous_taxa	ASV_950
Bacteria	Actinobacteria	Actinobacteria	Micromonosporales	Micromonosporaceae	Catellatospora	uous_taxa	ASV_952
Bacteria	Actinobacteria	Actinobacteria	Corynebacteriales	Mycobacteriaceae	Mycobacterium	NA	ASV_953
Bacteria	Proteobacteria	Alphaproteobacteria	Rhizobiales	Rhizobiaceae	NA	NA	ASV_954
Bacteria	Actinobacteria	Actinobacteria	Pseudonocardiales	Pseudonocardiaceae	Actinomycetospora	NA	ASV_955
Bacteria	Firmicutes	Clostridia	Clostridiales	Christensenellaceae	Christensenellaceae R-7 group	NA	ASV_956
Bacteria	Actinobacteria	Actinobacteria	Micrococcales	Beutenbergiaceae	Salana	uous_taxa	ASV_958
Bacteria	Actinobacteria	Actinobacteria	Pseudonocardiales	Pseudonocardiaceae	Pseudonocardia	NA	ASV_959
Bacteria	Proteobacteria	Alphaproteobacteria	Rhizobiales	Beijerinckiaceae	Bosea	NA	ASV_960
Bacteria	Proteobacteria	Alphaproteobacteria	Rickettsiales	Rickettsiaceae	Rickettsia	uous_taxa	ASV_961
Bacteria	Proteobacteria	Gammaproteobacteria	Betaproteobacteriales	Burkholderiaceae	Azohydromonas	NA	ASV_963
Bacteria	Firmicutes	Clostridia	Clostridiales	Lachnospiraceae	NA	NA	ASV_965
Bacteria	Proteobacteria	Alphaproteobacteria	Acetobacterales	Acetobacteraceae	NA	NA	ASV_968
Bacteria	Actinobacteria	Actinobacteria	Pseudonocardiales	Pseudonocardiaceae	Actinomycetospora	NA	ASV_969
Bacteria	Firmicutes	Clostridia	Clostridiales	Lachnospiraceae	NA	NA	ASV_970
Bacteria	Bacteroidetes	Bacteroidia	Bacteroidales	Prevotellaceae	Prevotella 1	uncultured Prevotellaceae bacterium	ASV_971
Bacteria	Spirochaetes	Spirochaetia	Spirochaetales	Spirochaetaceae	Treponema 2	NA	ASV_972
Bacteria	Proteobacteria	Alphaproteobacteria	Rhodobacterales	Rhodobacteraceae	Paracoccus	NA	ASV_974
Bacteria	Bacteroidetes	Bacteroidia	Sphingobacteriales	Sphingobacteriaceae	NA	NA	ASV_975
Bacteria	Proteobacteria	Gammaproteobacteria	Pseudomonadales	Pseudomonadaceae	Pseudomonas	Pseudomonas caeni	ASV_977
Bacteria	Actinobacteria	Thermoleophilia	Gaiellales	uncultured	NA	NA	ASV_984
Bacteria	Actinobacteria	Actinobacteria	Corynebacteriales	NA	NA	NA	ASV_985
Bacteria	Proteobacteria	NA	NA	NA	NA	NA	ASV_987
Bacteria	Bacteroidetes	Bacteroidia	Bacteroidales	Bacteroidales UCG-001	uncultured rumen bacterium	uncultured rumen bacterium	ASV_989
Bacteria	Firmicutes	Clostridia	Clostridiales	Christensenellaceae	Christensenellaceae R-7 group	uncultured rumen bacterium	ASV_990
Bacteria	Firmicutes	Bacilli	Bacillales	Alicyclobacillaceae	Tumebacillus	Tumebacillus ginsengisoli	ASV_994
Bacteria	Proteobacteria	Gammaproteobacteria	Pseudomonadales	Pseudomonadaceae	Pseudomonas	NA	ASV_995
Bacteria	Kiritimatiellaeota	Kiritimatiellae	WCHB1-41	uncultured bacterium	uncultured bacterium	uncultured bacterium	ASV_997
Bacteria	Firmicutes	Negativicutes	Selenomonadales	Veillonellaceae	Anaerovibrio	NA	ASV_998
Bacteria	Firmicutes	Clostridia	Clostridiales	Clostridiales vadinBB60 group	uncultured prokaryote	uncultured prokaryote	ASV_999
Bacteria	Actinobacteria	Actinobacteria	Kineosporiales	Kineosporiaceae	Kineococcus	uous_taxa	ASV_1000
Bacteria	Firmicutes	Bacilli	Lactobacillales	Lactobacillaceae	Lactobacillus	uncultured Lactobacillus sp.	ASV_1001
Bacteria	Bacteroidetes	Bacteroidia	Chitinophagales	Chitinophagaceae	Flaviaesturariibacter	uncultured bacterium	ASV_1008
Bacteria	Proteobacteria	Gammaproteobacteria	Betaproteobacteriales	Neisseriaceae	uncultured	uous_taxa	ASV_1009
Bacteria	Actinobacteria	Actinobacteria	Frankiales	uncultured	NA	NA	ASV_1010
Bacteria	Actinobacteria	Actinobacteria	Propionibacteriales	Propionibacteriaceae	Cutibacterium	NA	ASV_1011
Bacteria	Proteobacteria	Alphaproteobacteria	Sphingomonadales	Sphingomonadaceae	Sphingomonas	NA	ASV_1012
Bacteria	Actinobacteria	Actinobacteria	Corynebacteriales	Dietziaceae	Dietzia	NA	ASV_1013
Bacteria	Proteobacteria	Gammaproteobacteria	Betaproteobacteriales	Burkholderiaceae	NA	NA	ASV_1014
Bacteria	Proteobacteria	Alphaproteobacteria	Sphingomonadales	Sphingomonadaceae	Sphingomonas	NA	ASV_1015
Bacteria	Proteobacteria	Alphaproteobacteria	Caulobacterales	Caulobacteraceae	Brevundimonas	Brevundimonas diminuta	ASV_1017
Bacteria	Bacteroidetes	Bacteroidia	Cytophagales	Cytophagaceae	Rhodocytophaga	NA	ASV_1018
Bacteria	Proteobacteria	Deltaproteobacteria	Myxococcales	BIrii41	NA	NA	ASV_1020
Bacteria	Firmicutes	Clostridia	Clostridiales	Clostridiaceae 1	Clostridium sensu stricto 13	NA	ASV_1021
Bacteria	Actinobacteria	Actinobacteria	Propionibacteriales	Propionibacteriaceae	Microlunatus	NA	ASV_1022
Bacteria	Actinobacteria	Actinobacteria	Propionibacteriales	Nocardioidaceae	Nocardioides	NA	ASV_1023
Bacteria	Actinobacteria	Actinobacteria	Corynebacteriales	Nocardiaceae	Nocardia	Nocardia sp.	ASV_1024
Bacteria	Bacteroidetes	Bacteroidia	Bacteroidales	Rikenellaceae	Rikenellaceae RC9 gut group	uncultured bacterium	ASV_1025
Bacteria	Firmicutes	Clostridia	Clostridiales	Lachnospiraceae	Marvinbryantia	uncultured bacterium	ASV_1026
Bacteria	Firmicutes	Clostridia	Clostridiales	Ruminococcaceae	Ruminococcaceae NK4A214 group	NA	ASV_1027
Bacteria	Actinobacteria	Actinobacteria	Propionibacteriales	Nocardioidaceae	Marmoricola	NA	ASV_1029
Bacteria	Acidobacteria	Holophagae	Subgroup 7	uncultured Desulfuromonadales bacterium	uncultured Desulfuromonadales bacterium	uncultured Desulfuromonadales bacterium	ASV_1031
Bacteria	Proteobacteria	Gammaproteobacteria	Pseudomonadales	Pseudomonadaceae	Pseudomonas	NA	ASV_1033
Bacteria	Actinobacteria	Actinobacteria	Micrococcales	Dermabacteraceae	Brachybacterium	uous_taxa	ASV_1034
Bacteria	Firmicutes	Bacilli	Bacillales	Paenibacillaceae	Cohnella	NA	ASV_1035
Bacteria	Firmicutes	Clostridia	Clostridiales	Family XI	Anaerococcus	uncultured bacterium	ASV_1040
Bacteria	Proteobacteria	Deltaproteobacteria	Bdellovibrionales	Bacteriovoracaceae	Peredibacter	NA	ASV_1041
Bacteria	Actinobacteria	Actinobacteria	Micrococcales	Microbacteriaceae	Microbacterium	NA	ASV_1042
Bacteria	Bacteroidetes	Bacteroidia	Cytophagales	Hymenobacteraceae	Hymenobacter	Parahymenobacter ocellatus	ASV_1043
Bacteria	Proteobacteria	Gammaproteobacteria	Pseudomonadales	Pseudomonadaceae	Pseudomonas	NA	ASV_1046
Bacteria	Proteobacteria	Gammaproteobacteria	Pseudomonadales	Moraxellaceae	Acinetobacter	NA	ASV_1047
Bacteria	Actinobacteria	Actinobacteria	Pseudonocardiales	Pseudonocardiaceae	Actinomycetospora	NA	ASV_1052
Bacteria	Firmicutes	Clostridia	Clostridiales	Lachnospiraceae	NA	NA	ASV_1053
Bacteria	Actinobacteria	Thermoleophilia	Solirubrobacterales	Solirubrobacteraceae	uncultured	uous_taxa	ASV_1054
Bacteria	Proteobacteria	Alphaproteobacteria	Rhizobiales	Rhizobiaceae	NA	NA	ASV_1055
Bacteria	Proteobacteria	Alphaproteobacteria	Rhizobiales	Rhizobiaceae	Allorhizobium-Neorhizobium-Pararhizobium-Rhizobium	NA	ASV_1056
Bacteria	Kiritimatiellaeota	Kiritimatiellae	WCHB1-41	uncultured bacterium	uncultured bacterium	uncultured bacterium	ASV_1057
Bacteria	Bacteroidetes	Bacteroidia	Chitinophagales	Chitinophagaceae	Arachidicoccus	NA	ASV_1060
Bacteria	Spirochaetes	Spirochaetia	Spirochaetales	Spirochaetaceae	Treponema 2	Treponema sp. OC1	ASV_1061
Bacteria	Bacteroidetes	Bacteroidia	Bacteroidales	Rikenellaceae	SP3-e08	uncultured bacterium	ASV_1062
Bacteria	Proteobacteria	Gammaproteobacteria	Enterobacteriales	Enterobacteriaceae	Pectobacterium	NA	ASV_1063
Bacteria	Firmicutes	Bacilli	Bacillales	Paenibacillaceae	Paenibacillus	Paenibacillus glycanilyticus	ASV_1064
Bacteria	Actinobacteria	Actinobacteria	Bifidobacteriales	Bifidobacteriaceae	Bifidobacterium	NA	ASV_1065
Bacteria	Bacteroidetes	Bacteroidia	Bacteroidetes VC2.1 Bac22	metagenome	metagenome	metagenome	ASV_1067
Bacteria	Proteobacteria	Gammaproteobacteria	Betaproteobacteriales	Burkholderiaceae	NA	NA	ASV_1068
Bacteria	Bacteroidetes	Bacteroidia	Bacteroidales	Muribaculaceae	uncultured bacterium	uncultured bacterium	ASV_1069
Bacteria	Cyanobacteria	Oxyphotobacteria	Synechococcales	Cyanobiaceae	Cyanobium PCC-6307	NA	ASV_1071
Bacteria	Proteobacteria	Alphaproteobacteria	Azospirillales	Azospirillaceae	Skermanella	uncultured bacterium	ASV_1072
Bacteria	Proteobacteria	Gammaproteobacteria	Betaproteobacteriales	Burkholderiaceae	Ramlibacter	NA	ASV_1073
Bacteria	Firmicutes	Bacilli	Lactobacillales	Streptococcaceae	Streptococcus	NA	ASV_1075
Bacteria	Bacteroidetes	Bacteroidia	Cytophagales	Hymenobacteraceae	Hymenobacter	Siccationidurans metalli	ASV_1076
Bacteria	Firmicutes	Bacilli	Lactobacillales	Carnobacteriaceae	Granulicatella	NA	ASV_1084
Bacteria	Firmicutes	Bacilli	Bacillales	Alicyclobacillaceae	Tumebacillus	uous_taxa	ASV_1086
Bacteria	Bacteroidetes	Bacteroidia	Flavobacteriales	Weeksellaceae	Weeksella	uous_taxa	ASV_1087
Bacteria	Firmicutes	Bacilli	Bacillales	Thermoactinomycetaceae	NA	NA	ASV_1088
Bacteria	Actinobacteria	Actinobacteria	Corynebacteriales	Mycobacteriaceae	Mycobacterium	NA	ASV_1089
Bacteria	Bacteroidetes	Bacteroidia	Bacteroidales	Prevotellaceae	Prevotellaceae UCG-004	uncultured bacterium	ASV_1090
Bacteria	Actinobacteria	Thermoleophilia	Solirubrobacterales	67-14	NA	NA	ASV_1091
Bacteria	Actinobacteria	Actinobacteria	Micrococcales	Micrococcaceae	NA	NA	ASV_1092
Bacteria	Firmicutes	Erysipelotrichia	Erysipelotrichales	Erysipelotrichaceae	Turicibacter	NA	ASV_1093
Bacteria	Firmicutes	Clostridia	Clostridiales	Ruminococcaceae	[Eubacterium] coprostanoligenes group	NA	ASV_1094
Bacteria	Firmicutes	Clostridia	Clostridiales	Lachnospiraceae	Pseudobutyrivibrio	NA	ASV_1095
Bacteria	Proteobacteria	Alphaproteobacteria	Sphingomonadales	Sphingomonadaceae	NA	NA	ASV_1097
Bacteria	Actinobacteria	Actinobacteria	Corynebacteriales	Mycobacteriaceae	NA	NA	ASV_1098
Bacteria	Actinobacteria	Actinobacteria	Propionibacteriales	Nocardioidaceae	Nocardioides	NA	ASV_1099
Bacteria	Actinobacteria	Actinobacteria	Pseudonocardiales	Pseudonocardiaceae	Pseudonocardia	NA	ASV_1101
Bacteria	Actinobacteria	Actinobacteria	Propionibacteriales	Nocardioidaceae	Nocardioides	NA	ASV_1102
Bacteria	Bacteroidetes	Bacteroidia	Chitinophagales	Chitinophagaceae	Niabella	Niabella sp.	ASV_1104
Bacteria	Actinobacteria	Actinobacteria	Propionibacteriales	Nocardioidaceae	Marmoricola	NA	ASV_1105
Bacteria	Proteobacteria	Alphaproteobacteria	Sphingomonadales	Sphingomonadaceae	Sphingobium	NA	ASV_1106
Bacteria	Bacteroidetes	Bacteroidia	Cytophagales	Spirosomaceae	Dyadobacter	NA	ASV_1107
Bacteria	Proteobacteria	Alphaproteobacteria	Sphingomonadales	Sphingomonadaceae	Novosphingobium	NA	ASV_1108
Bacteria	Bacteroidetes	Bacteroidia	Cytophagales	Spirosomaceae	Dyadobacter	Dyadobacter fermentans	ASV_1109
Bacteria	Acidobacteria	Thermoanaerobaculia	Thermoanaerobaculales	Thermoanaerobaculaceae	Subgroup 10	NA	ASV_1111
Bacteria	Proteobacteria	Alphaproteobacteria	Rhizobiales	Beijerinckiaceae	Microvirga	NA	ASV_1113
Bacteria	Firmicutes	Bacilli	Bacillales	Planococcaceae	Sporosarcina	uncultured bacterium	ASV_1115
Bacteria	Proteobacteria	Alphaproteobacteria	Rhizobiales	Xanthobacteraceae	Bradyrhizobium	NA	ASV_1116
Bacteria	Acidobacteria	Blastocatellia (Subgroup 4)	Blastocatellales	Blastocatellaceae	NA	NA	ASV_1118
Bacteria	Verrucomicrobia	Verrucomicrobiae	Chthoniobacterales	Chthoniobacteraceae	Candidatus Udaeobacter	NA	ASV_1119
Bacteria	Actinobacteria	Acidimicrobiia	Microtrichales	uncultured	NA	NA	ASV_1120
Bacteria	Fibrobacteres	Fibrobacteria	Fibrobacterales	Fibrobacteraceae	Fibrobacter	Fibrobacter sp.	ASV_1125
Bacteria	Bacteroidetes	Bacteroidia	Bacteroidales	Bacteroidales BS11 gut group	uncultured rumen bacterium	uncultured rumen bacterium	ASV_1127
Bacteria	Firmicutes	Clostridia	Clostridiales	Christensenellaceae	Christensenellaceae R-7 group	NA	ASV_1128
Bacteria	WPS-2	Burkholderiales bacterium Beta_02	Burkholderiales bacterium Beta_02	Burkholderiales bacterium Beta_02	Burkholderiales bacterium Beta_02	Burkholderiales bacterium Beta_02	ASV_1129
Bacteria	Gemmatimonadetes	Gemmatimonadetes	Gemmatimonadales	Gemmatimonadaceae	Gemmatimonas	uncultured Gemmatimonas sp.	ASV_1130
Bacteria	Proteobacteria	Alphaproteobacteria	Rhizobiales	Rhizobiaceae	Aureimonas	uous_taxa	ASV_1131
Bacteria	Proteobacteria	Gammaproteobacteria	Betaproteobacteriales	Burkholderiaceae	Verticia	uous_taxa	ASV_1132
Bacteria	Proteobacteria	Alphaproteobacteria	Sphingomonadales	Sphingomonadaceae	Qipengyuania	NA	ASV_1136
Bacteria	Proteobacteria	Gammaproteobacteria	Betaproteobacteriales	Burkholderiaceae	NA	NA	ASV_1137
Bacteria	Firmicutes	Clostridia	Clostridiales	Peptostreptococcaceae	Sporacetigenium	NA	ASV_1140
Bacteria	Actinobacteria	Thermoleophilia	Solirubrobacterales	67-14	metagenome	metagenome	ASV_1141
Bacteria	Firmicutes	Clostridia	Clostridiales	Clostridiaceae 1	Clostridium sensu stricto 1	NA	ASV_1142
Bacteria	Firmicutes	Bacilli	Lactobacillales	Carnobacteriaceae	Atopostipes	NA	ASV_1143
Bacteria	Proteobacteria	Alphaproteobacteria	Rhizobiales	Rhizobiaceae	Aureimonas	NA	ASV_1144
Bacteria	Proteobacteria	Gammaproteobacteria	Betaproteobacteriales	Burkholderiaceae	Variovorax	NA	ASV_1146
Bacteria	Actinobacteria	Actinobacteria	Propionibacteriales	Nocardioidaceae	Nocardioides	uous_taxa	ASV_1148
Bacteria	Chloroflexi	SHA-26	uncultured bacterium	uncultured bacterium	uncultured bacterium	uncultured bacterium	ASV_1151
Bacteria	Chloroflexi	Ktedonobacteria	C0119	uncultured bacterium	uncultured bacterium	uncultured bacterium	ASV_1152
Bacteria	Actinobacteria	Actinobacteria	Micrococcales	Intrasporangiaceae	Phycicoccus	NA	ASV_1154
Bacteria	Chloroflexi	KD4-96	uous_taxa	uous_taxa	uous_taxa	uous_taxa	ASV_1159
Bacteria	Actinobacteria	Actinobacteria	Micrococcales	Micrococcaceae	Citricoccus	uous_taxa	ASV_1160
Bacteria	Bacteroidetes	Bacteroidia	Bacteroidales	Rikenellaceae	hoa5-07d05 gut group	uncultured bacterium	ASV_1162
Bacteria	Bacteroidetes	Bacteroidia	Bacteroidales	p-251-o5	uncultured bacterium	uncultured bacterium	ASV_1163
Bacteria	Firmicutes	Clostridia	Clostridiales	Christensenellaceae	Christensenellaceae R-7 group	NA	ASV_1164
Bacteria	Firmicutes	Clostridia	Clostridiales	Ruminococcaceae	Ruminococcaceae NK4A214 group	uous_taxa	ASV_1165
Bacteria	Proteobacteria	Gammaproteobacteria	Pseudomonadales	Pseudomonadaceae	Pseudomonas	Pseudomonas sp. S1(2011b)	ASV_1166
Bacteria	Firmicutes	Bacilli	Bacillales	Staphylococcaceae	Jeotgalicoccus	NA	ASV_1167
Bacteria	Actinobacteria	Actinobacteria	Streptomycetales	Streptomycetaceae	Streptomyces	NA	ASV_1169
Bacteria	Proteobacteria	Alphaproteobacteria	Rhizobiales	Rhizobiaceae	Mesorhizobium	NA	ASV_1170
Bacteria	Actinobacteria	Actinobacteria	Micrococcales	Dermabacteraceae	Brachybacterium	NA	ASV_1171
Bacteria	Patescibacteria	Saccharimonadia	Saccharimonadales	uncultured bacterium SBR2096	uncultured bacterium SBR2096	uncultured bacterium SBR2096	ASV_1172
Bacteria	Patescibacteria	Saccharimonadia	Saccharimonadales	NA	NA	NA	ASV_1173
Bacteria	Firmicutes	Bacilli	Bacillales	Paenibacillaceae	Paenibacillus	uncultured Firmicutes bacterium	ASV_1175
Bacteria	Proteobacteria	Alphaproteobacteria	Caulobacterales	Caulobacteraceae	uncultured	NA	ASV_1179
Bacteria	Proteobacteria	Alphaproteobacteria	Sphingomonadales	Sphingomonadaceae	Sphingobium	NA	ASV_1180
Bacteria	Firmicutes	Bacilli	Lactobacillales	Lactobacillaceae	Lactobacillus	Lactobacillus ozensis	ASV_1181
Bacteria	Actinobacteria	Thermoleophilia	Solirubrobacterales	67-14	uncultured Rubrobacteria bacterium	uncultured Rubrobacteria bacterium	ASV_1182
Bacteria	Proteobacteria	Gammaproteobacteria	Betaproteobacteriales	Burkholderiaceae	NA	NA	ASV_1185
Bacteria	Proteobacteria	Alphaproteobacteria	Rhizobiales	Beijerinckiaceae	uncultured	uncultured bacterium	ASV_1186
Bacteria	Firmicutes	Bacilli	Bacillales	Bacillaceae	Bacillus	Bacillus phocaeensis	ASV_1187
Bacteria	Firmicutes	Clostridia	Clostridiales	Clostridiaceae 1	Clostridium sensu stricto 1	NA	ASV_1188
Bacteria	Proteobacteria	Gammaproteobacteria	Betaproteobacteriales	Burkholderiaceae	Burkholderia-Caballeronia-Paraburkholderia	NA	ASV_1189
Bacteria	Proteobacteria	Alphaproteobacteria	Rhodobacterales	Rhodobacteraceae	Paracoccus	NA	ASV_1191
Bacteria	Proteobacteria	Alphaproteobacteria	Sphingomonadales	Sphingomonadaceae	Sphingomonas	NA	ASV_1197
Bacteria	Chloroflexi	KD4-96	NA	NA	NA	NA	ASV_1198
Bacteria	Actinobacteria	Thermoleophilia	Solirubrobacterales	67-14	NA	NA	ASV_1201
Bacteria	Firmicutes	Negativicutes	Selenomonadales	Veillonellaceae	Veillonella	NA	ASV_1202
Bacteria	Actinobacteria	Thermoleophilia	Solirubrobacterales	67-14	uncultured bacterium	uncultured bacterium	ASV_1205
Bacteria	Firmicutes	Clostridia	Clostridiales	Lachnospiraceae	Lachnospiraceae XPB1014 group	NA	ASV_1206
Bacteria	Actinobacteria	Actinobacteria	Micrococcales	Microbacteriaceae	Agrococcus	uncultured bacterium	ASV_1209
Bacteria	Actinobacteria	Actinobacteria	Propionibacteriales	Nocardioidaceae	Nocardioides	NA	ASV_1210
Bacteria	Proteobacteria	Gammaproteobacteria	Betaproteobacteriales	Burkholderiaceae	Paenalcaligenes	uous_taxa	ASV_1212
Bacteria	Firmicutes	Clostridia	Clostridiales	Christensenellaceae	Christensenellaceae R-7 group	NA	ASV_1213
Bacteria	Spirochaetes	Spirochaetia	Spirochaetales	Spirochaetaceae	Treponema 2	uncultured bacterium	ASV_1214
Bacteria	Firmicutes	Clostridia	Clostridiales	Ruminococcaceae	Ruminococcaceae UCG-002	uncultured bacterium	ASV_1215
Bacteria	Firmicutes	Clostridia	Clostridiales	Family XIII	Family XIII AD3011 group	NA	ASV_1216
Bacteria	Firmicutes	Clostridia	Clostridiales	Ruminococcaceae	Ruminococcus 2	uncultured bacterium	ASV_1217
Bacteria	Fibrobacteres	Fibrobacteria	Fibrobacterales	Fibrobacteraceae	Fibrobacter	Fibrobacter sp.	ASV_1218
Bacteria	Firmicutes	Clostridia	Clostridiales	Christensenellaceae	Christensenellaceae R-7 group	NA	ASV_1219
Bacteria	Actinobacteria	Actinobacteria	Micrococcales	Cellulomonadaceae	Cellulomonas	NA	ASV_1220
Bacteria	Actinobacteria	Actinobacteria	Pseudonocardiales	Pseudonocardiaceae	Lechevalieria	uous_taxa	ASV_1221
Bacteria	Firmicutes	Bacilli	Lactobacillales	Leuconostocaceae	Leuconostoc	NA	ASV_1223
Bacteria	Actinobacteria	Actinobacteria	Micrococcales	Micrococcaceae	NA	NA	ASV_1224
Bacteria	Proteobacteria	Deltaproteobacteria	Myxococcales	NA	NA	NA	ASV_1225
Bacteria	Proteobacteria	Alphaproteobacteria	Rhizobiales	Devosiaceae	uncultured	metagenome	ASV_1226
Bacteria	Verrucomicrobia	Verrucomicrobiae	Chthoniobacterales	Chthoniobacteraceae	Chthoniobacter	NA	ASV_1227
Bacteria	Firmicutes	Bacilli	Lactobacillales	Streptococcaceae	Lactococcus	NA	ASV_1228
Bacteria	Proteobacteria	Alphaproteobacteria	Rhizobiales	Rhizobiaceae	Falsochrobactrum	NA	ASV_1230
Bacteria	Bacteroidetes	Bacteroidia	Cytophagales	Spirosomaceae	Dyadobacter	NA	ASV_1234
Bacteria	Firmicutes	Bacilli	Bacillales	Bacillaceae	Bacillus	Bacillus thermoamylovorans	ASV_1236
Bacteria	Proteobacteria	Gammaproteobacteria	Betaproteobacteriales	Burkholderiaceae	NA	NA	ASV_1237
Bacteria	Bacteroidetes	Bacteroidia	Bacteroidales	Muribaculaceae	NA	NA	ASV_1238
Bacteria	Bacteroidetes	Bacteroidia	Bacteroidales	Bacteroidaceae	Bacteroides	NA	ASV_1239
Bacteria	Chloroflexi	Gitt-GS-136	NA	NA	NA	NA	ASV_1241
Bacteria	Proteobacteria	Gammaproteobacteria	Betaproteobacteriales	Burkholderiaceae	Massilia	NA	ASV_1244
Bacteria	Actinobacteria	Actinobacteria	Corynebacteriales	Mycobacteriaceae	Mycobacterium	NA	ASV_1247
Bacteria	Proteobacteria	Gammaproteobacteria	Enterobacteriales	Enterobacteriaceae	NA	NA	ASV_1248
Bacteria	Cyanobacteria	Oxyphotobacteria	Nostocales	Phormidiaceae	Tychonema CCAP 1459-11B	NA	ASV_1249
Bacteria	Firmicutes	Bacilli	Lactobacillales	Carnobacteriaceae	Atopostipes	NA	ASV_1250
Bacteria	Bacteroidetes	Bacteroidia	Flavobacteriales	Flavobacteriaceae	Flavobacterium	NA	ASV_1252
Bacteria	Actinobacteria	Thermoleophilia	Solirubrobacterales	67-14	NA	NA	ASV_1253
Bacteria	Proteobacteria	Alphaproteobacteria	Rhizobiales	Rhizobiales Incertae Sedis	uncultured	uous_taxa	ASV_1258
Bacteria	Actinobacteria	Actinobacteria	Propionibacteriales	Nocardioidaceae	Nocardioides	NA	ASV_1259
Bacteria	Actinobacteria	Coriobacteriia	Coriobacteriales	Atopobiaceae	Atopobium	NA	ASV_1260
Bacteria	Proteobacteria	Alphaproteobacteria	Sphingomonadales	Sphingomonadaceae	Sphingomonas	NA	ASV_1261
Bacteria	Firmicutes	Bacilli	Lactobacillales	NA	NA	NA	ASV_1262
Bacteria	Firmicutes	Clostridia	Clostridiales	Family XIII	Mogibacterium	uous_taxa	ASV_1263
Bacteria	Actinobacteria	Actinobacteria	Micrococcales	Microbacteriaceae	NA	NA	ASV_1265
Bacteria	Bacteroidetes	Bacteroidia	Bacteroidales	Rikenellaceae	dgA-11 gut group	uncultured bacterium	ASV_1266
Bacteria	Firmicutes	Clostridia	Clostridiales	Lachnospiraceae	NA	NA	ASV_1267
Bacteria	Firmicutes	Clostridia	Clostridiales	Ruminococcaceae	Ruminococcaceae UCG-005	NA	ASV_1268
Bacteria	Firmicutes	Clostridia	Clostridiales	Family XIII	Family XIII UCG-001	uncultured bacterium	ASV_1269
Bacteria	Firmicutes	Clostridia	Clostridiales	Ruminococcaceae	Ruminococcaceae NK4A214 group	NA	ASV_1272
Bacteria	Spirochaetes	Spirochaetia	Spirochaetales	Spirochaetaceae	Treponema 2	uncultured bacterium	ASV_1273
Bacteria	Spirochaetes	Spirochaetia	Spirochaetales	Spirochaetaceae	Treponema 2	NA	ASV_1274
Bacteria	Firmicutes	Clostridia	Clostridiales	Family XIII	Mogibacterium	uncultured bacterium	ASV_1275
Bacteria	Spirochaetes	MVP-15	NA	NA	NA	NA	ASV_1276
Bacteria	Firmicutes	Clostridia	Clostridiales	Lachnospiraceae	NA	NA	ASV_1277
Bacteria	Fusobacteria	Fusobacteriia	Fusobacteriales	Leptotrichiaceae	Leptotrichia	uous_taxa	ASV_1278
Bacteria	Actinobacteria	Thermoleophilia	Solirubrobacterales	Solirubrobacteraceae	uncultured	NA	ASV_1279
Bacteria	Firmicutes	Bacilli	Bacillales	Bacillaceae	Bacillus	NA	ASV_1281
Bacteria	Firmicutes	Bacilli	Bacillales	Paenibacillaceae	Paenibacillus	NA	ASV_1282
Bacteria	Firmicutes	Clostridia	Clostridiales	Family XVIII	NA	NA	ASV_1284
Bacteria	Chloroflexi	Chloroflexia	Thermomicrobiales	JG30-KF-CM45	uncultured soil bacterium	uncultured soil bacterium	ASV_1285
Bacteria	Elusimicrobia	Elusimicrobia	Lineage IV	uous_taxa	uous_taxa	uous_taxa	ASV_1287
Bacteria	Bacteroidetes	Bacteroidia	Sphingobacteriales	Sphingobacteriaceae	Nubsella	uncultured bacterium	ASV_1288
Bacteria	Actinobacteria	Actinobacteria	Micrococcales	Microbacteriaceae	Microbacterium	NA	ASV_1292
Bacteria	Proteobacteria	Alphaproteobacteria	Rhodobacterales	Rhodobacteraceae	Rubellimicrobium	NA	ASV_1293
Bacteria	Chloroflexi	Gitt-GS-136	uncultured Chloroflexi bacterium	uncultured Chloroflexi bacterium	uncultured Chloroflexi bacterium	uncultured Chloroflexi bacterium	ASV_1294
Bacteria	Proteobacteria	Alphaproteobacteria	Sphingomonadales	Sphingomonadaceae	Novosphingobium	NA	ASV_1296
Bacteria	Firmicutes	Clostridia	Clostridiales	Clostridiaceae 1	Clostridium sensu stricto 1	NA	ASV_1297
Bacteria	Proteobacteria	Gammaproteobacteria	Xanthomonadales	Xanthomonadaceae	NA	NA	ASV_1301
Bacteria	Actinobacteria	Actinobacteria	Propionibacteriales	Propionibacteriaceae	Cutibacterium	uncultured Propionibacterium sp.	ASV_1303
Bacteria	Actinobacteria	Acidimicrobiia	Microtrichales	Iamiaceae	Iamia	uncultured Acidimicrobidae bacterium	ASV_1304
Bacteria	Proteobacteria	Deltaproteobacteria	Myxococcales	Blfdi19	uncultured soil bacterium	uncultured soil bacterium	ASV_1305
Bacteria	Proteobacteria	Gammaproteobacteria	Xanthomonadales	Rhodanobacteraceae	Dyella	NA	ASV_1314
Bacteria	Gemmatimonadetes	Gemmatimonadetes	Gemmatimonadales	Gemmatimonadaceae	uncultured	uous_taxa	ASV_1315
Bacteria	Firmicutes	Clostridia	Clostridiales	Ruminococcaceae	GCA-900066225	NA	ASV_1319
Bacteria	Proteobacteria	Gammaproteobacteria	Betaproteobacteriales	Neisseriaceae	Neisseria	NA	ASV_1320
Bacteria	Actinobacteria	Thermoleophilia	Solirubrobacterales	Solirubrobacteraceae	Solirubrobacter	uncultured bacterium	ASV_1321
Bacteria	Actinobacteria	Actinobacteria	Frankiales	Geodermatophilaceae	NA	NA	ASV_1322
Bacteria	Actinobacteria	Actinobacteria	Propionibacteriales	Nocardioidaceae	Nocardioides	NA	ASV_1323
Bacteria	Actinobacteria	MB-A2-108	uncultured Kineosporiaceae bacterium	uncultured Kineosporiaceae bacterium	uncultured Kineosporiaceae bacterium	uncultured Kineosporiaceae bacterium	ASV_1324
Bacteria	Firmicutes	Bacilli	Bacillales	Planococcaceae	Kurthia	NA	ASV_1325
Bacteria	Actinobacteria	Actinobacteria	Propionibacteriales	Nocardioidaceae	Nocardioides	NA	ASV_1326
Bacteria	Bacteroidetes	Bacteroidia	Flavobacteriales	Flavobacteriaceae	Flavobacterium	NA	ASV_1327
Bacteria	Tenericutes	Mollicutes	Mollicutes RF39	uous_taxa	uous_taxa	uous_taxa	ASV_1328
Bacteria	Actinobacteria	Actinobacteria	Corynebacteriales	Tsukamurellaceae	Tsukamurella	NA	ASV_1332
Bacteria	Actinobacteria	Actinobacteria	Frankiales	Geodermatophilaceae	Blastococcus	NA	ASV_1334
Bacteria	Proteobacteria	Alphaproteobacteria	Rhizobiales	Beijerinckiaceae	Methylobacterium	NA	ASV_1335
Bacteria	Actinobacteria	Coriobacteriia	Coriobacteriales	Eggerthellaceae	uncultured	uncultured bacterium	ASV_1338
Bacteria	Spirochaetes	Spirochaetia	Spirochaetales	Spirochaetaceae	Treponema 2	uncultured bacterium	ASV_1339
Bacteria	Proteobacteria	Gammaproteobacteria	Aeromonadales	Succinivibrionaceae	NA	NA	ASV_1340
Bacteria	Bacteroidetes	Bacteroidia	Bacteroidales	Prevotellaceae	Prevotellaceae UCG-001	uncultured Prevotellaceae bacterium	ASV_1341
Bacteria	Firmicutes	Clostridia	Clostridiales	Ruminococcaceae	Ruminococcaceae NK4A214 group	NA	ASV_1342
Bacteria	Firmicutes	Clostridia	Clostridiales	Ruminococcaceae	Ruminococcaceae UCG-010	uncultured bacterium	ASV_1343
Bacteria	Actinobacteria	Actinobacteria	Micromonosporales	Micromonosporaceae	Actinoplanes	uous_taxa	ASV_1344
Bacteria	Proteobacteria	Alphaproteobacteria	Sphingomonadales	Sphingomonadaceae	Sphingomonas	NA	ASV_1345
Bacteria	Bacteroidetes	Bacteroidia	Chitinophagales	Chitinophagaceae	Terrimonas	NA	ASV_1347
Bacteria	Firmicutes	Clostridia	Clostridiales	Lachnospiraceae	NA	NA	ASV_1350
Bacteria	Bacteroidetes	Bacteroidia	Sphingobacteriales	Sphingobacteriaceae	NA	NA	ASV_1352
Bacteria	Proteobacteria	Alphaproteobacteria	Rhizobiales	Beijerinckiaceae	Microvirga	NA	ASV_1357
Bacteria	Proteobacteria	Gammaproteobacteria	Betaproteobacteriales	Burkholderiaceae	NA	NA	ASV_1358
Bacteria	Proteobacteria	Alphaproteobacteria	Rhizobiales	Devosiaceae	Devosia	NA	ASV_1359
Bacteria	Firmicutes	Bacilli	Bacillales	NA	NA	NA	ASV_1360
Bacteria	Bacteroidetes	Bacteroidia	Flavobacteriales	Flavobacteriaceae	Flavobacterium	NA	ASV_1361
Bacteria	Proteobacteria	Deltaproteobacteria	NA	NA	NA	NA	ASV_1362
Bacteria	Firmicutes	Bacilli	Bacillales	Alicyclobacillaceae	Tumebacillus	uncultured bacterium	ASV_1364
Bacteria	Proteobacteria	Alphaproteobacteria	Rhizobiales	Rhizobiaceae	NA	NA	ASV_1366
Bacteria	Firmicutes	Clostridia	Clostridiales	Ruminococcaceae	Faecalibacterium	NA	ASV_1367
Bacteria	Bacteroidetes	Bacteroidia	Cytophagales	Microscillaceae	Siphonobacter	uous_taxa	ASV_1369
Bacteria	Proteobacteria	Gammaproteobacteria	Betaproteobacteriales	Burkholderiaceae	NA	NA	ASV_1372
Bacteria	Proteobacteria	Alphaproteobacteria	Rhodobacterales	Rhodobacteraceae	Rhodobacter	uncultured bacterium	ASV_1373
Bacteria	Bacteroidetes	Bacteroidia	Cytophagales	Spirosomaceae	Dyadobacter	NA	ASV_1374
Bacteria	Bacteroidetes	Bacteroidia	Chitinophagales	Chitinophagaceae	Chitinophaga	NA	ASV_1379
Bacteria	Bacteroidetes	Bacteroidia	Bacteroidales	Muribaculaceae	NA	NA	ASV_1383
Bacteria	Firmicutes	Bacilli	Bacillales	Sporolactobacillaceae	Pullulanibacillus	NA	ASV_1387
Bacteria	Proteobacteria	Alphaproteobacteria	Sphingomonadales	Sphingomonadaceae	Sphingomonas	uncultured Sphingomonadaceae bacterium	ASV_1391
Bacteria	Actinobacteria	Actinobacteria	Pseudonocardiales	Pseudonocardiaceae	Pseudonocardia	NA	ASV_1392
Bacteria	Firmicutes	Bacilli	Bacillales	Bacillaceae	Bacillus	NA	ASV_1393
Bacteria	Actinobacteria	Actinobacteria	Micrococcales	Micrococcaceae	Arthrobacter	NA	ASV_1394
Bacteria	Proteobacteria	Gammaproteobacteria	Pseudomonadales	Pseudomonadaceae	Pseudomonas	NA	ASV_1395
Bacteria	Actinobacteria	Actinobacteria	Micrococcales	Intrasporangiaceae	Phycicoccus	uous_taxa	ASV_1396
Bacteria	Proteobacteria	Deltaproteobacteria	NA	NA	NA	NA	ASV_1397
Bacteria	Bacteroidetes	Bacteroidia	Cytophagales	Spirosomaceae	Spirosoma	NA	ASV_1398
Bacteria	Firmicutes	Bacilli	Bacillales	Paenibacillaceae	Paenibacillus	NA	ASV_1399
Bacteria	Actinobacteria	Thermoleophilia	Solirubrobacterales	67-14	NA	NA	ASV_1401
Bacteria	Bacteroidetes	Bacteroidia	Bacteroidales	Bacteroidales RF16 group	uncultured bacterium	uncultured bacterium	ASV_1402
Bacteria	Firmicutes	Erysipelotrichia	Erysipelotrichales	Erysipelotrichaceae	Erysipelotrichaceae UCG-004	uncultured rumen bacterium	ASV_1403
Bacteria	Firmicutes	Clostridia	Clostridiales	Family XIII	Mogibacterium	uncultured bacterium	ASV_1404
Bacteria	Firmicutes	Bacilli	Bacillales	Planococcaceae	Solibacillus	NA	ASV_1409
Bacteria	Actinobacteria	Actinobacteria	Corynebacteriales	Corynebacteriaceae	Corynebacterium 1	NA	ASV_1410
Bacteria	Firmicutes	Clostridia	Clostridiales	Ruminococcaceae	Ruminococcaceae NK4A214 group	NA	ASV_1414
Bacteria	Actinobacteria	Actinobacteria	Micrococcales	Micrococcaceae	Arthrobacter	NA	ASV_1417
Bacteria	Chloroflexi	Chloroflexia	Chloroflexales	Herpetosiphonaceae	Herpetosiphon	uncultured bacterium	ASV_1418
Bacteria	Firmicutes	Bacilli	Bacillales	Paenibacillaceae	Saccharibacillus	NA	ASV_1419
Bacteria	Proteobacteria	Alphaproteobacteria	Rhizobiales	Devosiaceae	Devosia	NA	ASV_1420
Bacteria	Firmicutes	Bacilli	Bacillales	NA	NA	NA	ASV_1424
Bacteria	Firmicutes	Clostridia	Clostridiales	Lachnospiraceae	NA	NA	ASV_1425
Bacteria	Proteobacteria	Gammaproteobacteria	Betaproteobacteriales	Burkholderiaceae	Cupriavidus	NA	ASV_1429
Bacteria	Bacteroidetes	Bacteroidia	Chitinophagales	Chitinophagaceae	Flavisolibacter	NA	ASV_1437
Bacteria	Proteobacteria	Gammaproteobacteria	Pseudomonadales	Moraxellaceae	Acinetobacter	NA	ASV_1446
Bacteria	Proteobacteria	Alphaproteobacteria	Rhizobiales	Beijerinckiaceae	Microvirga	NA	ASV_1447
Bacteria	Gemmatimonadetes	Longimicrobia	Longimicrobiales	Longimicrobiaceae	uncultured bacterium	uncultured bacterium	ASV_1450
Bacteria	Proteobacteria	Alphaproteobacteria	Rhizobiales	Beijerinckiaceae	Methylobacterium	Methylobacterium aquaticum	ASV_1453
Bacteria	Firmicutes	Bacilli	Bacillales	Alicyclobacillaceae	Tumebacillus	uncultured bacterium	ASV_1457
Bacteria	Actinobacteria	Actinobacteria	Propionibacteriales	Nocardioidaceae	Aeromicrobium	uous_taxa	ASV_1466
Bacteria	Proteobacteria	Deltaproteobacteria	Myxococcales	Polyangiaceae	Aetherobacter	uncultured bacterium	ASV_1467
Bacteria	Chloroflexi	TK10	uncultured Chloroflexus sp.	uncultured Chloroflexus sp.	uncultured Chloroflexus sp.	uncultured Chloroflexus sp.	ASV_1471
Bacteria	Firmicutes	Bacilli	Bacillales	Paenibacillaceae	Paenibacillus	uncultured Firmicutes bacterium	ASV_1473
Bacteria	Actinobacteria	Actinobacteria	Frankiales	Cryptosporangiaceae	Cryptosporangium	uous_taxa	ASV_1475
Bacteria	Bacteroidetes	Bacteroidia	Cytophagales	Hymenobacteraceae	Hymenobacter	uncultured bacterium	ASV_1476
Bacteria	Actinobacteria	Actinobacteria	Micromonosporales	Micromonosporaceae	Dactylosporangium	uncultured bacterium	ASV_1477
Bacteria	Acidobacteria	Acidobacteriia	Solibacterales	Solibacteraceae (Subgroup 3)	NA	NA	ASV_1478
Bacteria	Actinobacteria	Actinobacteria	Micrococcales	Cellulomonadaceae	Cellulomonas	uous_taxa	ASV_1481
Bacteria	Actinobacteria	Thermoleophilia	Solirubrobacterales	NA	NA	NA	ASV_1484
Bacteria	Actinobacteria	Actinobacteria	Propionibacteriales	Nocardioidaceae	Nocardioides	NA	ASV_1485
Bacteria	Proteobacteria	Alphaproteobacteria	Rhizobiales	Xanthobacteraceae	NA	NA	ASV_1486
Bacteria	Actinobacteria	Actinobacteria	Corynebacteriales	Nocardiaceae	Nocardia	NA	ASV_1487
Bacteria	Actinobacteria	Acidimicrobiia	Microtrichales	Ilumatobacteraceae	uncultured	NA	ASV_1488
Bacteria	Actinobacteria	Actinobacteria	Corynebacteriales	Nocardiaceae	Williamsia	uous_taxa	ASV_1489
Bacteria	Proteobacteria	Gammaproteobacteria	Xanthomonadales	Xanthomonadaceae	Lysobacter	uncultured Xanthomonadaceae bacterium	ASV_1496
Bacteria	Firmicutes	Clostridia	Clostridiales	Peptostreptococcaceae	Paraclostridium	NA	ASV_1497
Bacteria	Actinobacteria	Acidimicrobiia	IMCC26256	NA	NA	NA	ASV_1498
Bacteria	Bacteroidetes	Bacteroidia	Bacteroidales	Prevotellaceae	Alloprevotella	NA	ASV_1499
Bacteria	Bacteroidetes	Bacteroidia	Cytophagales	Spirosomaceae	Larkinella	uncultured bacterium	ASV_1500
Bacteria	Actinobacteria	Actinobacteria	Micromonosporales	Micromonosporaceae	Longispora	uous_taxa	ASV_1506
Bacteria	Proteobacteria	Alphaproteobacteria	Rhodobacterales	Rhodobacteraceae	NA	NA	ASV_1511
Bacteria	Firmicutes	Clostridia	Clostridiales	Lachnospiraceae	Lachnospiraceae XPB1014 group	uous_taxa	ASV_1512
Bacteria	Bacteroidetes	Bacteroidia	Bacteroidales	Rikenellaceae	Rikenellaceae RC9 gut group	uncultured bacterium	ASV_1513
Bacteria	Firmicutes	Clostridia	Clostridiales	Lachnospiraceae	Lachnospiraceae XPB1014 group	uncultured bacterium	ASV_1514
Bacteria	Firmicutes	Clostridia	Clostridiales	Lachnospiraceae	NA	NA	ASV_1515
Bacteria	Firmicutes	Clostridia	Clostridiales	Ruminococcaceae	Ruminococcus 1	NA	ASV_1516
Bacteria	Firmicutes	Clostridia	Clostridiales	Ruminococcaceae	Ruminococcaceae UCG-005	NA	ASV_1517
Bacteria	Proteobacteria	Gammaproteobacteria	Betaproteobacteriales	Burkholderiaceae	Noviherbaspirillum	NA	ASV_1520
Bacteria	Actinobacteria	Acidimicrobiia	IMCC26256	NA	NA	NA	ASV_1521
Bacteria	Chloroflexi	Chloroflexia	Thermomicrobiales	JG30-KF-CM45	uous_taxa	uous_taxa	ASV_1522
Bacteria	Gemmatimonadetes	Longimicrobia	Longimicrobiales	Longimicrobiaceae	Longimicrobium	uncultured bacterium	ASV_1523
Bacteria	Actinobacteria	Actinobacteria	Micrococcales	Intrasporangiaceae	NA	NA	ASV_1525
Bacteria	Proteobacteria	Alphaproteobacteria	Sphingomonadales	Sphingomonadaceae	Sphingomonas	NA	ASV_1526
Bacteria	Proteobacteria	Gammaproteobacteria	Gammaproteobacteria Incertae Sedis	Unknown Family	Acidibacter	uncultured proteobacterium	ASV_1531
Bacteria	Actinobacteria	Actinobacteria	Propionibacteriales	Propionibacteriaceae	Microlunatus	NA	ASV_1532
Bacteria	Actinobacteria	Thermoleophilia	Solirubrobacterales	Solirubrobacteraceae	Solirubrobacter	NA	ASV_1533
Bacteria	Actinobacteria	Actinobacteria	Micrococcales	Microbacteriaceae	Leucobacter	NA	ASV_1534
Bacteria	Bacteroidetes	Bacteroidia	Cytophagales	Cytophagaceae	Sporocytophaga	uncultured bacterium	ASV_1535
Bacteria	Proteobacteria	Deltaproteobacteria	Myxococcales	Vulgatibacteraceae	Vulgatibacter	uncultured bacterium	ASV_1544
Bacteria	Actinobacteria	Actinobacteria	Propionibacteriales	Nocardioidaceae	Marmoricola	uncultured bacterium	ASV_1547
Bacteria	Patescibacteria	Saccharimonadia	Saccharimonadales	Saccharimonadaceae	uncultured compost bacterium	uncultured compost bacterium	ASV_1552
Bacteria	Bacteroidetes	Bacteroidia	Flavobacteriales	Flavobacteriaceae	Flavobacterium	NA	ASV_1553
Bacteria	Bacteroidetes	Bacteroidia	Cytophagales	Spirosomaceae	Larkinella	NA	ASV_1554
Bacteria	Proteobacteria	Alphaproteobacteria	Sphingomonadales	Sphingomonadaceae	Sphingomonas	NA	ASV_1556
Bacteria	Bacteroidetes	Bacteroidia	Cytophagales	Hymenobacteraceae	Pontibacter	NA	ASV_1559
Bacteria	Deinococcus-Thermus	Deinococci	Deinococcales	Deinococcaceae	Deinococcus	NA	ASV_1560
Bacteria	Chloroflexi	Chloroflexia	Chloroflexales	Herpetosiphonaceae	Herpetosiphon	NA	ASV_1561
Bacteria	Proteobacteria	Alphaproteobacteria	Sphingomonadales	Sphingomonadaceae	Sphingomonas	NA	ASV_1563
Bacteria	Proteobacteria	Gammaproteobacteria	Betaproteobacteriales	SC-I-84	NA	NA	ASV_1564
Bacteria	Planctomycetes	Planctomycetacia	Isosphaerales	Isosphaeraceae	uncultured	uncultured bacterium	ASV_1565
Bacteria	Actinobacteria	Actinobacteria	Propionibacteriales	Nocardioidaceae	Marmoricola	uncultured bacterium	ASV_1566
Bacteria	Bacteroidetes	Bacteroidia	Cytophagales	Spirosomaceae	Spirosoma	Spirosoma sp. TA_AB	ASV_1568
Bacteria	Actinobacteria	Actinobacteria	Propionibacteriales	Nocardioidaceae	uncultured	uncultured bacterium	ASV_1576
Bacteria	Firmicutes	Clostridia	Clostridiales	Peptostreptococcaceae	Paraclostridium	NA	ASV_1577
Bacteria	Proteobacteria	Alphaproteobacteria	Rhodobacterales	Rhodobacteraceae	Amaricoccus	NA	ASV_1579
Bacteria	Proteobacteria	Alphaproteobacteria	Sphingomonadales	Sphingomonadaceae	Sphingomonas	NA	ASV_1580
Bacteria	Deinococcus-Thermus	Deinococci	Deinococcales	Deinococcaceae	Deinococcus	Deinococcus sp. N3	ASV_1585
Bacteria	Acidobacteria	Acidobacteriia	Acidobacteriales	uncultured	NA	NA	ASV_1588
Bacteria	Chloroflexi	TK10	NA	NA	NA	NA	ASV_1589
Bacteria	Chloroflexi	Gitt-GS-136	uncultured bacterium	uncultured bacterium	uncultured bacterium	uncultured bacterium	ASV_1590
Bacteria	Firmicutes	Bacilli	Bacillales	Paenibacillaceae	Paenibacillus	NA	ASV_1591
Bacteria	Actinobacteria	Thermoleophilia	Solirubrobacterales	Solirubrobacteraceae	NA	NA	ASV_1595
Bacteria	Proteobacteria	Gammaproteobacteria	Betaproteobacteriales	Nitrosomonadaceae	Nitrosospira	uous_taxa	ASV_1596
Bacteria	Actinobacteria	Thermoleophilia	Gaiellales	uncultured	NA	NA	ASV_1597
Bacteria	Proteobacteria	Alphaproteobacteria	Rhizobiales	Rhizobiaceae	Allorhizobium-Neorhizobium-Pararhizobium-Rhizobium	NA	ASV_1599
Bacteria	Proteobacteria	Alphaproteobacteria	Sphingomonadales	Sphingomonadaceae	Sphingomonas	NA	ASV_1600
Bacteria	Actinobacteria	Thermoleophilia	Gaiellales	Gaiellaceae	Gaiella	NA	ASV_1606
Bacteria	Firmicutes	Clostridia	Clostridiales	Lachnospiraceae	XBB1006	uncultured bacterium	ASV_1607
Bacteria	Tenericutes	Mollicutes	Izimaplasmatales	uncultured bacterium	uncultured bacterium	uncultured bacterium	ASV_1608
Bacteria	Proteobacteria	Alphaproteobacteria	Rhizobiales	Rhizobiaceae	Allorhizobium-Neorhizobium-Pararhizobium-Rhizobium	NA	ASV_1612
Bacteria	Firmicutes	Clostridia	Clostridiales	Lachnospiraceae	NA	NA	ASV_1614
Bacteria	Firmicutes	Clostridia	Clostridiales	Lachnospiraceae	NA	NA	ASV_1615
Bacteria	Firmicutes	Clostridia	Clostridiales	Ruminococcaceae	Ruminococcaceae UCG-005	uncultured organism	ASV_1616
Bacteria	Firmicutes	NA	NA	NA	NA	NA	ASV_1617
Bacteria	Firmicutes	Clostridia	Clostridiales	Ruminococcaceae	Ruminococcaceae NK4A214 group	uncultured rumen bacterium	ASV_1618
Bacteria	Bacteroidetes	Bacteroidia	Bacteroidales	p-251-o5	uncultured bacterium	uncultured bacterium	ASV_1620
Bacteria	Fibrobacteres	Fibrobacteria	Fibrobacterales	Fibrobacteraceae	Fibrobacter	Fibrobacter sp.	ASV_1622
Bacteria	Firmicutes	Clostridia	Clostridiales	Christensenellaceae	Christensenellaceae R-7 group	NA	ASV_1623
Bacteria	Cyanobacteria	Melainabacteria	Gastranaerophilales	NA	NA	NA	ASV_1624
Bacteria	Firmicutes	Clostridia	Clostridiales	Ruminococcaceae	uncultured rumen bacterium	uncultured rumen bacterium	ASV_1625
Bacteria	Firmicutes	Clostridia	Clostridiales	Lachnospiraceae	NA	NA	ASV_1626
Bacteria	Proteobacteria	Alphaproteobacteria	Rhizobiales	Beijerinckiaceae	Psychroglaciecola	uous_taxa	ASV_1628
Bacteria	Firmicutes	Clostridia	Clostridiales	Lachnospiraceae	Blautia	NA	ASV_1629
Bacteria	Actinobacteria	Actinobacteria	Catenulisporales	Catenulisporaceae	Catenulispora	uous_taxa	ASV_1630
Bacteria	Actinobacteria	Actinobacteria	Propionibacteriales	Nocardioidaceae	Nocardioides	NA	ASV_1632
Bacteria	Proteobacteria	Gammaproteobacteria	Betaproteobacteriales	Burkholderiaceae	Noviherbaspirillum	NA	ASV_1633
Bacteria	Actinobacteria	Actinobacteria	Micrococcales	Micrococcaceae	Nesterenkonia	uous_taxa	ASV_1634
Bacteria	Bacteroidetes	Bacteroidia	Cytophagales	Hymenobacteraceae	Hymenobacter	NA	ASV_1635
Bacteria	Actinobacteria	Actinobacteria	Streptomycetales	Streptomycetaceae	Streptomyces	NA	ASV_1641
Bacteria	Deinococcus-Thermus	Deinococci	Deinococcales	Deinococcaceae	Deinococcus	uous_taxa	ASV_1643
Bacteria	Bacteroidetes	Bacteroidia	Sphingobacteriales	Sphingobacteriaceae	Mucilaginibacter	uncultured bacterium	ASV_1653
Bacteria	Bacteroidetes	Bacteroidia	Sphingobacteriales	Sphingobacteriaceae	Nubsella	uncultured bacterium	ASV_1656
Bacteria	Proteobacteria	Gammaproteobacteria	Betaproteobacteriales	Burkholderiaceae	NA	NA	ASV_1658
Bacteria	Actinobacteria	Thermoleophilia	Gaiellales	uncultured	NA	NA	ASV_1659
Bacteria	Bacteroidetes	Bacteroidia	Cytophagales	Spirosomaceae	Flectobacillus	uous_taxa	ASV_1663
Bacteria	Cyanobacteria	Oxyphotobacteria	Synechococcales	Cyanobiaceae	Cyanobium PCC-6307	metagenome	ASV_1664
Bacteria	Proteobacteria	Alphaproteobacteria	Rhizobiales	Xanthobacteraceae	uncultured	NA	ASV_1665
Bacteria	Planctomycetes	Planctomycetacia	Planctomycetales	uncultured	NA	NA	ASV_1667
Bacteria	Actinobacteria	Actinobacteria	Corynebacteriales	Dietziaceae	Dietzia	uous_taxa	ASV_1672
Bacteria	Actinobacteria	Actinobacteria	Propionibacteriales	Propionibacteriaceae	Cutibacterium	NA	ASV_1674
Bacteria	Actinobacteria	Thermoleophilia	Gaiellales	uncultured	NA	NA	ASV_1676
Bacteria	Actinobacteria	Acidimicrobiia	Microtrichales	Ilumatobacteraceae	Ilumatobacter	NA	ASV_1678
Bacteria	Actinobacteria	Actinobacteria	Corynebacteriales	Nocardiaceae	Nocardia	NA	ASV_1689
Bacteria	Proteobacteria	Gammaproteobacteria	Pseudomonadales	Pseudomonadaceae	Pseudomonas	NA	ASV_1690
Bacteria	Actinobacteria	Actinobacteria	Micrococcales	Microbacteriaceae	NA	NA	ASV_1693
Bacteria	Actinobacteria	Thermoleophilia	Solirubrobacterales	Solirubrobacteraceae	NA	NA	ASV_1694
Bacteria	Deinococcus-Thermus	Deinococci	Deinococcales	Deinococcaceae	Deinococcus	uous_taxa	ASV_1695
Bacteria	Actinobacteria	Actinobacteria	Frankiales	Acidothermaceae	Acidothermus	NA	ASV_1701
Bacteria	Chloroflexi	Gitt-GS-136	uncultured bacterium	uncultured bacterium	uncultured bacterium	uncultured bacterium	ASV_1704
Bacteria	Firmicutes	Clostridia	Clostridiales	Lachnospiraceae	Hespellia	NA	ASV_1706
Bacteria	Bacteroidetes	Bacteroidia	Cytophagales	Amoebophilaceae	Candidatus Cardinium	uous_taxa	ASV_1707
Bacteria	Acidobacteria	Acidobacteriia	Acidobacteriales	uncultured	NA	NA	ASV_1708
Bacteria	Proteobacteria	Deltaproteobacteria	Myxococcales	BIrii41	uncultured bacterium	uncultured bacterium	ASV_1709
Bacteria	Proteobacteria	Alphaproteobacteria	Rhizobiales	Devosiaceae	Devosia	NA	ASV_1710
Bacteria	Proteobacteria	Alphaproteobacteria	Rhizobiales	Beijerinckiaceae	1174-901-12	uncultured bacterium	ASV_1711
Bacteria	Actinobacteria	Actinobacteria	Corynebacteriales	Nocardiaceae	Nocardia	uous_taxa	ASV_1717
Bacteria	Actinobacteria	Thermoleophilia	Gaiellales	uncultured	uncultured bacterium	uncultured bacterium	ASV_1718
Bacteria	Firmicutes	Clostridia	Clostridiales	Lachnospiraceae	Herbinix	NA	ASV_1719
Bacteria	Proteobacteria	Alphaproteobacteria	Rhizobiales	Xanthobacteraceae	NA	NA	ASV_1721
Bacteria	Actinobacteria	Thermoleophilia	Gaiellales	Gaiellaceae	Gaiella	NA	ASV_1722
Bacteria	Bacteroidetes	Bacteroidia	Bacteroidales	Rikenellaceae	Rikenellaceae RC9 gut group	uncultured bacterium	ASV_1723
Bacteria	Bacteroidetes	Bacteroidia	Bacteroidales	Bacteroidales UCG-001	NA	NA	ASV_1724
Bacteria	Bacteroidetes	Bacteroidia	Bacteroidales	Paludibacteraceae	uncultured	uncultured bacterium	ASV_1725
Bacteria	Verrucomicrobia	Verrucomicrobiae	Verrucomicrobiales	Akkermansiaceae	Akkermansia	uncultured bacterium	ASV_1726
Bacteria	Actinobacteria	Actinobacteria	Micrococcales	Micrococcaceae	Arthrobacter	Arthrobacter deserti	ASV_1729
Bacteria	Actinobacteria	Actinobacteria	Corynebacteriales	Nocardiaceae	Gordonia	NA	ASV_1735
Bacteria	Chloroflexi	Chloroflexia	Thermomicrobiales	JG30-KF-CM45	NA	NA	ASV_1738
Bacteria	Actinobacteria	Actinobacteria	Frankiales	Geodermatophilaceae	Modestobacter	NA	ASV_1739
Bacteria	Firmicutes	Clostridia	Clostridiales	Ruminococcaceae	Ruminococcaceae UCG-002	NA	ASV_1740
Bacteria	Firmicutes	Clostridia	Clostridiales	Ruminococcaceae	uncultured	uncultured rumen bacterium	ASV_1741
Bacteria	Firmicutes	Clostridia	Clostridiales	Lachnospiraceae	[Eubacterium] hallii group	uncultured bacterium	ASV_1742
Bacteria	Firmicutes	Clostridia	Clostridiales	Ruminococcaceae	Ruminococcaceae NK4A214 group	NA	ASV_1743
Bacteria	Firmicutes	Clostridia	Clostridiales	Lachnospiraceae	[Eubacterium] hallii group	uncultured bacterium	ASV_1744
Bacteria	Proteobacteria	Gammaproteobacteria	Alteromonadales	Alteromonadaceae	Rheinheimera	NA	ASV_1745
Bacteria	Firmicutes	Bacilli	Bacillales	Bacillaceae	Pseudogracilibacillus	uous_taxa	ASV_1746
Bacteria	Actinobacteria	Acidimicrobiia	uncultured	NA	NA	NA	ASV_1747
Bacteria	Firmicutes	Bacilli	Bacillales	Bacillaceae	Bacillus	NA	ASV_1750
Bacteria	Proteobacteria	Deltaproteobacteria	Myxococcales	P3OB-42	uncultured bacterium	uncultured bacterium	ASV_1751
Bacteria	Firmicutes	Erysipelotrichia	Erysipelotrichales	Erysipelotrichaceae	Faecalibaculum	uncultured bacterium	ASV_1752
Bacteria	Actinobacteria	Actinobacteria	Micromonosporales	Micromonosporaceae	NA	NA	ASV_1753
Bacteria	Proteobacteria	Alphaproteobacteria	Rhizobiales	Rhizobiaceae	Paenochrobactrum	NA	ASV_1754
Bacteria	Firmicutes	Clostridia	Clostridiales	Clostridiaceae 1	Clostridium sensu stricto 1	NA	ASV_1756
Bacteria	Actinobacteria	Actinobacteria	Micrococcales	Microbacteriaceae	Agromyces	NA	ASV_1757
Bacteria	Actinobacteria	Actinobacteria	Corynebacteriales	Nocardiaceae	Nocardia	NA	ASV_1758
Bacteria	Firmicutes	Bacilli	Bacillales	Bacillaceae	Bacillus	Bacillus alkalitelluris	ASV_1762
Bacteria	Actinobacteria	Actinobacteria	Propionibacteriales	Propionibacteriaceae	Cutibacterium	uous_taxa	ASV_1774
Bacteria	Verrucomicrobia	Verrucomicrobiae	Chthoniobacterales	Chthoniobacteraceae	Chthoniobacter	uncultured bacterium	ASV_1778
Bacteria	Actinobacteria	Actinobacteria	Micrococcales	Microbacteriaceae	Microbacterium	NA	ASV_1779
Bacteria	Proteobacteria	Alphaproteobacteria	Sphingomonadales	Sphingomonadaceae	Altererythrobacter	NA	ASV_1780
Bacteria	Proteobacteria	Gammaproteobacteria	Betaproteobacteriales	Burkholderiaceae	Noviherbaspirillum	NA	ASV_1789
Bacteria	Proteobacteria	Gammaproteobacteria	Pseudomonadales	Pseudomonadaceae	Pseudomonas	NA	ASV_1795
Bacteria	Actinobacteria	Actinobacteria	Micrococcales	Brevibacteriaceae	Brevibacterium	NA	ASV_1800
Bacteria	Proteobacteria	Gammaproteobacteria	Cellvibrionales	Halieaceae	OM60(NOR5) clade	NA	ASV_1803
Bacteria	Proteobacteria	Alphaproteobacteria	Rhizobiales	Rhizobiaceae	NA	NA	ASV_1806
Bacteria	Actinobacteria	Actinobacteria	Propionibacteriales	Nocardioidaceae	Nocardioides	NA	ASV_1807
Bacteria	Actinobacteria	Actinobacteria	Micrococcales	Microbacteriaceae	Frigoribacterium	uous_taxa	ASV_1810
Bacteria	Proteobacteria	Gammaproteobacteria	Betaproteobacteriales	Neisseriaceae	Neisseria	NA	ASV_1812
Bacteria	Proteobacteria	Gammaproteobacteria	Pseudomonadales	Pseudomonadaceae	Pseudomonas	NA	ASV_1816
Bacteria	Proteobacteria	Alphaproteobacteria	Rhizobiales	Rhizobiaceae	Allorhizobium-Neorhizobium-Pararhizobium-Rhizobium	NA	ASV_1818
Bacteria	Proteobacteria	Alphaproteobacteria	Rhodobacterales	Rhodobacteraceae	Paracoccus	NA	ASV_1822
Bacteria	Bacteroidetes	Bacteroidia	Bacteroidales	Prevotellaceae	Prevotellaceae UCG-001	uncultured bacterium	ASV_1835
Bacteria	Actinobacteria	Actinobacteria	Streptosporangiales	Streptosporangiaceae	Microbispora	uous_taxa	ASV_1841
Bacteria	Firmicutes	Bacilli	Bacillales	Bacillaceae	Bacillus	NA	ASV_1845
Bacteria	Firmicutes	Clostridia	Clostridiales	Clostridiaceae 1	Clostridium sensu stricto 12	Clostridium nitrophenolicum	ASV_1847
Bacteria	Actinobacteria	Actinobacteria	Corynebacteriales	Segniliparaceae	Segniliparus	uous_taxa	ASV_1848
Bacteria	Actinobacteria	Actinobacteria	Propionibacteriales	Nocardioidaceae	Nocardioides	Nocardioides ultimimeridianus	ASV_1852
Bacteria	Gemmatimonadetes	Gemmatimonadetes	Gemmatimonadales	Gemmatimonadaceae	Gemmatimonas	uncultured Gemmatimonas sp.	ASV_1853
Bacteria	Actinobacteria	Acidimicrobiia	Microtrichales	Ilumatobacteraceae	CL500-29 marine group	metagenome	ASV_1854
Bacteria	Firmicutes	Bacilli	Bacillales	Paenibacillaceae	Paenibacillus	NA	ASV_1859
Bacteria	Actinobacteria	Thermoleophilia	Gaiellales	uncultured	NA	NA	ASV_1860
Bacteria	Actinobacteria	Thermoleophilia	Gaiellales	Gaiellaceae	Gaiella	uncultured bacterium	ASV_1861
Bacteria	Chloroflexi	Ktedonobacteria	Ktedonobacterales	Ktedonobacteraceae	uncultured	uncultured soil bacterium	ASV_1862
Bacteria	Firmicutes	Bacilli	Bacillales	Paenibacillaceae	Paenibacillus	NA	ASV_1863
Bacteria	Firmicutes	Bacilli	Bacillales	Paenibacillaceae	Paenibacillus	Paenibacillus kobensis	ASV_1864
Bacteria	Actinobacteria	Thermoleophilia	Gaiellales	uncultured	NA	NA	ASV_1865
Bacteria	Actinobacteria	Thermoleophilia	Solirubrobacterales	67-14	uncultured bacterium	uncultured bacterium	ASV_1866
Bacteria	Firmicutes	Clostridia	Clostridiales	Lachnospiraceae	Tyzzerella 3	uncultured bacterium	ASV_1867
Bacteria	Bacteroidetes	Bacteroidia	Cytophagales	Hymenobacteraceae	Hymenobacter	Macrotyloma uniflorum	ASV_1872
Bacteria	Firmicutes	Clostridia	Clostridiales	Heliobacteriaceae	Hydrogenispora	NA	ASV_1873
Bacteria	Actinobacteria	Thermoleophilia	Solirubrobacterales	67-14	uncultured bacterium	uncultured bacterium	ASV_1877
Bacteria	Proteobacteria	Alphaproteobacteria	Rhizobiales	Rhizobiaceae	NA	NA	ASV_1879
Bacteria	Actinobacteria	Thermoleophilia	Solirubrobacterales	Solirubrobacteraceae	Conexibacter	uncultured bacterium	ASV_1880
Bacteria	Actinobacteria	Thermoleophilia	Gaiellales	Gaiellaceae	Gaiella	NA	ASV_1881
Bacteria	Actinobacteria	Thermoleophilia	Gaiellales	uncultured	NA	NA	ASV_1882
Bacteria	Firmicutes	Clostridia	Clostridiales	Christensenellaceae	Christensenellaceae R-7 group	NA	ASV_1883
Bacteria	Firmicutes	Clostridia	Clostridiales	Ruminococcaceae	Ruminococcus 1	NA	ASV_1884
Bacteria	Actinobacteria	Thermoleophilia	Solirubrobacterales	67-14	metagenome	metagenome	ASV_1889
Bacteria	Bacteroidetes	Bacteroidia	Cytophagales	Hymenobacteraceae	Rufibacter	uncultured bacterium	ASV_1892
Bacteria	Proteobacteria	Alphaproteobacteria	Sphingomonadales	Sphingomonadaceae	Sphingomonas	NA	ASV_1894
Bacteria	Proteobacteria	Gammaproteobacteria	Betaproteobacteriales	Burkholderiaceae	Verticia	NA	ASV_1895
Bacteria	Bacteroidetes	Bacteroidia	Bacteroidales	Bacteroidales UCG-001	uncultured bacterium	uncultured bacterium	ASV_1898
Bacteria	Firmicutes	Clostridia	Clostridiales	Clostridiales vadinBB60 group	NA	NA	ASV_1899
Bacteria	Firmicutes	Clostridia	Clostridiales	Lachnospiraceae	Marvinbryantia	NA	ASV_1900
Bacteria	Bacteroidetes	Bacteroidia	Bacteroidales	F082	NA	NA	ASV_1901
Bacteria	Firmicutes	Clostridia	Clostridiales	Christensenellaceae	Christensenellaceae R-7 group	NA	ASV_1903
Bacteria	Firmicutes	Clostridia	Clostridiales	Lachnospiraceae	uncultured	NA	ASV_1904
Bacteria	Bacteroidetes	Bacteroidia	Bacteroidales	F082	uncultured bacterium	uncultured bacterium	ASV_1905
Bacteria	Proteobacteria	Alphaproteobacteria	Azospirillales	Azospirillaceae	Skermanella	NA	ASV_1906
Bacteria	Actinobacteria	Actinobacteria	Micromonosporales	Micromonosporaceae	Actinoplanes	NA	ASV_1907
Bacteria	Actinobacteria	Thermoleophilia	Solirubrobacterales	67-14	NA	NA	ASV_1908
Bacteria	Actinobacteria	Actinobacteria	Micromonosporales	Micromonosporaceae	Micromonospora	NA	ASV_1909
Bacteria	Proteobacteria	Deltaproteobacteria	Myxococcales	Sandaracinaceae	uncultured	NA	ASV_1910
Bacteria	Actinobacteria	Thermoleophilia	Solirubrobacterales	67-14	NA	NA	ASV_1912
Bacteria	Proteobacteria	Gammaproteobacteria	Pseudomonadales	Pseudomonadaceae	Pseudomonas	Pseudomonas stutzeri	ASV_1914
Bacteria	Bacteroidetes	Bacteroidia	Bacteroidales	Muribaculaceae	NA	NA	ASV_1916
Bacteria	Actinobacteria	Thermoleophilia	Solirubrobacterales	67-14	uncultured bacterium	uncultured bacterium	ASV_1920
Bacteria	Acidobacteria	Subgroup 6	uncultured Anaeromyxobacter sp.	uncultured Anaeromyxobacter sp.	uncultured Anaeromyxobacter sp.	uncultured Anaeromyxobacter sp.	ASV_1921
Bacteria	Bacteroidetes	Bacteroidia	Chitinophagales	Chitinophagaceae	Taibaiella	Bacteroidetes bacterium 47-18	ASV_1922
Bacteria	Firmicutes	Bacilli	Bacillales	Bacillaceae	Bacillus	NA	ASV_1923
Bacteria	Actinobacteria	Actinobacteria	Pseudonocardiales	Pseudonocardiaceae	Umezawaea	uous_taxa	ASV_1924
Bacteria	Actinobacteria	Acidimicrobiia	Microtrichales	Ilumatobacteraceae	Ilumatobacter	NA	ASV_1926
Bacteria	Actinobacteria	Thermoleophilia	Solirubrobacterales	Solirubrobacteraceae	Patulibacter	uncultured bacterium	ASV_1927
Bacteria	Proteobacteria	Alphaproteobacteria	Sphingomonadales	Sphingomonadaceae	Sphingopyxis	NA	ASV_1928
Bacteria	Proteobacteria	Gammaproteobacteria	Betaproteobacteriales	Burkholderiaceae	NA	NA	ASV_1929
Bacteria	Actinobacteria	Actinobacteria	Micrococcales	Microbacteriaceae	Leucobacter	NA	ASV_1931
Bacteria	Bacteroidetes	Bacteroidia	Cytophagales	Hymenobacteraceae	Adhaeribacter	uncultured bacterium	ASV_1937
Bacteria	Bacteroidetes	Bacteroidia	Sphingobacteriales	Sphingobacteriaceae	Pedobacter	NA	ASV_1938
Bacteria	Actinobacteria	Actinobacteria	Propionibacteriales	Nocardioidaceae	Aeromicrobium	uous_taxa	ASV_1947
Bacteria	Actinobacteria	Actinobacteria	Propionibacteriales	Nocardioidaceae	Nocardioides	NA	ASV_1957
Bacteria	Proteobacteria	Gammaproteobacteria	Betaproteobacteriales	Burkholderiaceae	Hydrogenophaga	NA	ASV_1959
Bacteria	Actinobacteria	Actinobacteria	Propionibacteriales	Propionibacteriaceae	Raineyella	uncultured bacterium	ASV_1960
Bacteria	Actinobacteria	Actinobacteria	Corynebacteriales	Tsukamurellaceae	Tsukamurella	metagenome	ASV_1961
Bacteria	Proteobacteria	Alphaproteobacteria	Rhizobiales	Rhizobiaceae	NA	NA	ASV_1962
Bacteria	Bacteroidetes	Bacteroidia	Cytophagales	Hymenobacteraceae	Hymenobacter	NA	ASV_1964
Bacteria	Actinobacteria	Actinobacteria	Micrococcales	Microbacteriaceae	Agromyces	NA	ASV_1965
Bacteria	Actinobacteria	Actinobacteria	Propionibacteriales	Propionibacteriaceae	Cutibacterium	NA	ASV_1966
Bacteria	Firmicutes	Clostridia	Clostridiales	Family XI	Peptoniphilus	uncultured organism	ASV_1969
Bacteria	Bacteroidetes	Bacteroidia	Cytophagales	Hymenobacteraceae	Hymenobacter	Parahymenobacter ocellatus	ASV_1972
Bacteria	Proteobacteria	Alphaproteobacteria	Rhizobiales	Rhizobiaceae	Allorhizobium-Neorhizobium-Pararhizobium-Rhizobium	NA	ASV_1973
Bacteria	Proteobacteria	Gammaproteobacteria	Betaproteobacteriales	Rhodocyclaceae	Dechlorosoma	uncultured bacterium	ASV_1975
Bacteria	Acidobacteria	Blastocatellia (Subgroup 4)	Blastocatellales	Blastocatellaceae	Blastocatella	NA	ASV_1976
Bacteria	Proteobacteria	Alphaproteobacteria	Caulobacterales	Caulobacteraceae	Phenylobacterium	NA	ASV_1980
Bacteria	Actinobacteria	Actinobacteria	Frankiales	Nakamurellaceae	Nakamurella	NA	ASV_1985
Bacteria	Firmicutes	Bacilli	Bacillales	Listeriaceae	Brochothrix	NA	ASV_1987
Bacteria	Firmicutes	Bacilli	Bacillales	Planococcaceae	NA	NA	ASV_1988
Bacteria	Acidobacteria	Subgroup 6	NA	NA	NA	NA	ASV_2018
Bacteria	Firmicutes	Bacilli	Lactobacillales	Lactobacillaceae	Lactobacillus	NA	ASV_2023
Bacteria	Acidobacteria	Subgroup 6	NA	NA	NA	NA	ASV_2024
Bacteria	Bacteroidetes	Bacteroidia	Cytophagales	Hymenobacteraceae	Hymenobacter	Hymenobacter wooponensis	ASV_2030
Bacteria	Proteobacteria	Alphaproteobacteria	Acetobacterales	Acetobacteraceae	Acidiphilium	NA	ASV_2031
Bacteria	Proteobacteria	Gammaproteobacteria	Gammaproteobacteria Incertae Sedis	Unknown Family	Acidibacter	NA	ASV_2037
Bacteria	Firmicutes	Erysipelotrichia	Erysipelotrichales	Erysipelotrichaceae	ZOR0006	uous_taxa	ASV_2045
Bacteria	Firmicutes	Bacilli	Bacillales	Paenibacillaceae	Paenibacillus	NA	ASV_2046
Bacteria	Bacteroidetes	Bacteroidia	Chitinophagales	Chitinophagaceae	NA	NA	ASV_2047
Bacteria	Actinobacteria	Actinobacteria	Frankiales	Nakamurellaceae	Nakamurella	NA	ASV_2048
Bacteria	Fusobacteria	Fusobacteriia	Fusobacteriales	Leptotrichiaceae	uncultured	marine metagenome	ASV_2049
Bacteria	Patescibacteria	Saccharimonadia	Saccharimonadales	NA	NA	NA	ASV_2050
Bacteria	Proteobacteria	Gammaproteobacteria	Xanthomonadales	Xanthomonadaceae	Stenotrophomonas	NA	ASV_2051
Bacteria	Proteobacteria	Alphaproteobacteria	Rhodobacterales	Rhodobacteraceae	uncultured	metagenome	ASV_2053
Bacteria	Proteobacteria	Gammaproteobacteria	Pasteurellales	Pasteurellaceae	Haemophilus	NA	ASV_2054
Bacteria	Proteobacteria	Alphaproteobacteria	Sphingomonadales	Sphingomonadaceae	Altererythrobacter	NA	ASV_2055
Bacteria	Firmicutes	Erysipelotrichia	Erysipelotrichales	Erysipelotrichaceae	ZOR0006	uous_taxa	ASV_2057
Bacteria	Proteobacteria	Alphaproteobacteria	Sphingomonadales	Sphingomonadaceae	Sphingomonas	NA	ASV_2064
Bacteria	Fibrobacteres	Fibrobacteria	Fibrobacterales	Fibrobacteraceae	possible genus 04	uncultured bacterium	ASV_2065
Bacteria	Proteobacteria	Alphaproteobacteria	Rhizobiales	Rhizobiaceae	Phyllobacterium	Phyllobacterium catacumbae	ASV_2066
Bacteria	Actinobacteria	Thermoleophilia	Gaiellales	uncultured	NA	NA	ASV_2067
Bacteria	Firmicutes	Bacilli	Bacillales	Paenibacillaceae	Paenibacillus	NA	ASV_2072
Bacteria	Bacteroidetes	Bacteroidia	Bacteroidales	Bacteroidales RF16 group	uncultured bacterium	uncultured bacterium	ASV_2075
Bacteria	Bacteroidetes	Bacteroidia	Bacteroidales	F082	NA	NA	ASV_2077
Bacteria	Firmicutes	Clostridia	Clostridiales	Family XIII	NA	NA	ASV_2078
Bacteria	Proteobacteria	Alphaproteobacteria	Rhizobiales	Hyphomicrobiaceae	Hyphomicrobium	metagenome	ASV_2081
Bacteria	Bacteroidetes	Bacteroidia	Sphingobacteriales	Sphingobacteriaceae	Sphingobacterium	NA	ASV_2098
Bacteria	Actinobacteria	Thermoleophilia	Solirubrobacterales	67-14	uncultured actinobacterium	uncultured actinobacterium	ASV_2103
Bacteria	Chloroflexi	Chloroflexia	Thermomicrobiales	JG30-KF-CM45	uncultured Chloroflexi bacterium	uncultured Chloroflexi bacterium	ASV_2106
Bacteria	Bacteroidetes	Bacteroidia	Bacteroidales	Rikenellaceae	Mucinivorans	uncultured bacterium	ASV_2107
Bacteria	Actinobacteria	Coriobacteriia	Coriobacteriales	Eggerthellaceae	Enterorhabdus	uncultured bacterium	ASV_2109
Bacteria	Firmicutes	Clostridia	Clostridiales	Ruminococcaceae	Ruminococcus 1	bacterium V9D2012	ASV_2110
Bacteria	Firmicutes	Bacilli	Lactobacillales	Carnobacteriaceae	Atopostipes	NA	ASV_2114
Bacteria	Proteobacteria	Gammaproteobacteria	Betaproteobacteriales	Burkholderiaceae	Paenalcaligenes	NA	ASV_2115
Bacteria	Proteobacteria	Alphaproteobacteria	Acetobacterales	Acetobacteraceae	Roseomonas	NA	ASV_2116
Bacteria	Proteobacteria	Alphaproteobacteria	Rhodobacterales	Rhodobacteraceae	Rubellimicrobium	NA	ASV_2117
Bacteria	Chloroflexi	Chloroflexia	Thermomicrobiales	JG30-KF-CM45	NA	NA	ASV_2118
Bacteria	Actinobacteria	Actinobacteria	Propionibacteriales	Nocardioidaceae	Nocardioides	NA	ASV_2121
Bacteria	Proteobacteria	Gammaproteobacteria	Pseudomonadales	Pseudomonadaceae	Pseudomonas	bacterium WM06i-B4E	ASV_2127
Bacteria	Actinobacteria	Thermoleophilia	Solirubrobacterales	67-14	NA	NA	ASV_2130
Bacteria	Firmicutes	Bacilli	Bacillales	NA	NA	NA	ASV_2148
Bacteria	Proteobacteria	Gammaproteobacteria	Oceanospirillales	Halomonadaceae	Carnimonas	NA	ASV_2150
Bacteria	Proteobacteria	Alphaproteobacteria	Rhizobiales	Beijerinckiaceae	NA	NA	ASV_2151
Bacteria	Actinobacteria	Actinobacteria	Frankiales	Acidothermaceae	Acidothermus	NA	ASV_2164
Bacteria	Actinobacteria	Actinobacteria	Micrococcales	Microbacteriaceae	NA	NA	ASV_2168
Bacteria	Proteobacteria	Alphaproteobacteria	Sphingomonadales	Sphingomonadaceae	Sphingobium	NA	ASV_2169
Bacteria	Acidobacteria	Acidobacteriia	Solibacterales	Solibacteraceae (Subgroup 3)	Bryobacter	NA	ASV_2176
Bacteria	Actinobacteria	Actinobacteria	Micrococcales	Intrasporangiaceae	Ornithinicoccus	uncultured bacterium	ASV_2178
Bacteria	Proteobacteria	Alphaproteobacteria	Rhizobiales	uncultured	NA	NA	ASV_2179
Bacteria	Planctomycetes	OM190	uncultured bacterium	uncultured bacterium	uncultured bacterium	uncultured bacterium	ASV_2180
Bacteria	Actinobacteria	Acidimicrobiia	Microtrichales	Iamiaceae	Iamia	uous_taxa	ASV_2183
Bacteria	Proteobacteria	Alphaproteobacteria	Sphingomonadales	Sphingomonadaceae	Altererythrobacter	NA	ASV_2184
Bacteria	Firmicutes	Clostridia	Clostridiales	Lachnospiraceae	Roseburia	NA	ASV_2188
Bacteria	Actinobacteria	Actinobacteria	Pseudonocardiales	Pseudonocardiaceae	Pseudonocardia	uous_taxa	ASV_2191
Bacteria	Proteobacteria	Gammaproteobacteria	Xanthomonadales	Rhodanobacteraceae	Tahibacter	NA	ASV_2192
Bacteria	Acidobacteria	Blastocatellia (Subgroup 4)	Blastocatellales	Blastocatellaceae	uncultured	NA	ASV_2193
Bacteria	Firmicutes	Bacilli	Bacillales	Bacillaceae	Bacillus	NA	ASV_2199
Bacteria	Firmicutes	Bacilli	Lactobacillales	Carnobacteriaceae	Atopostipes	uous_taxa	ASV_2205
Bacteria	Proteobacteria	Alphaproteobacteria	Azospirillales	Azospirillaceae	Azospirillum	NA	ASV_2206
Bacteria	Cyanobacteria	Oxyphotobacteria	Oxyphotobacteria Incertae Sedis	Unknown Family	Pseudanabaena NgrPSln22	Pseudanabaenaceae cyanobacterium CENA319	ASV_2207
Bacteria	Proteobacteria	Alphaproteobacteria	Sphingomonadales	Sphingomonadaceae	Blastomonas	NA	ASV_2210
Bacteria	Proteobacteria	Alphaproteobacteria	Rhizobiales	Beijerinckiaceae	Microvirga	NA	ASV_2212
Bacteria	Cyanobacteria	Oxyphotobacteria	Nostocales	Chroococcidiopsaceae	Crinalium SAG 22.89	uncultured bacterium	ASV_2216
Bacteria	Bacteroidetes	Bacteroidia	Flavobacteriales	Weeksellaceae	Chryseobacterium	NA	ASV_2223
Bacteria	Actinobacteria	Actinobacteria	Micrococcales	Brevibacteriaceae	Spelaeicoccus	actinobacterium Lad_11K	ASV_2227
Bacteria	Bacteroidetes	Bacteroidia	Chitinophagales	Chitinophagaceae	Segetibacter	NA	ASV_2235
Bacteria	Firmicutes	Clostridia	Clostridiales	Lachnospiraceae	Lachnoclostridium	NA	ASV_2239
Bacteria	Proteobacteria	Alphaproteobacteria	Rhizobiales	Beijerinckiaceae	Microvirga	NA	ASV_2240
Bacteria	Actinobacteria	Acidimicrobiia	IMCC26256	uncultured bacterium	uncultured bacterium	uncultured bacterium	ASV_2242
Bacteria	Planctomycetes	Planctomycetacia	Pirellulales	Pirellulaceae	Pirellula	bacterium enrichment culture clone B176(2011)	ASV_2251
Bacteria	Armatimonadetes	Chthonomonadetes	Chthonomonadales	uncultured Lutispora sp.	uncultured Lutispora sp.	uncultured Lutispora sp.	ASV_2252
Bacteria	Bacteroidetes	Bacteroidia	Cytophagales	Hymenobacteraceae	Hymenobacter	NA	ASV_2253
Bacteria	Gemmatimonadetes	Gemmatimonadetes	Gemmatimonadales	Gemmatimonadaceae	Gemmatimonas	uncultured bacterium	ASV_2254
Bacteria	Actinobacteria	Acidimicrobiia	Microtrichales	NA	NA	NA	ASV_2255
Bacteria	Acidobacteria	Subgroup 6	NA	NA	NA	NA	ASV_2261
Bacteria	Actinobacteria	Thermoleophilia	Gaiellales	uncultured	NA	NA	ASV_2281
Bacteria	Chloroflexi	KD4-96	uncultured bacterium	uncultured bacterium	uncultured bacterium	uncultured bacterium	ASV_2283
Bacteria	Actinobacteria	Actinobacteria	Micrococcales	Microbacteriaceae	NA	NA	ASV_2286
Bacteria	Chloroflexi	Chloroflexia	Thermomicrobiales	JG30-KF-CM45	uncultured bacterium	uncultured bacterium	ASV_2290
Bacteria	Chloroflexi	KD4-96	NA	NA	NA	NA	ASV_2291
Bacteria	Chloroflexi	Chloroflexia	Thermomicrobiales	JG30-KF-CM45	metagenome	metagenome	ASV_2295
Bacteria	Proteobacteria	Gammaproteobacteria	Xanthomonadales	Xanthomonadaceae	Luteimonas	NA	ASV_2298
Bacteria	Bacteroidetes	Bacteroidia	Bacteroidales	Tannerellaceae	Parabacteroides	NA	ASV_2300
Bacteria	Bacteroidetes	Bacteroidia	Bacteroidales	Rikenellaceae	Alistipes	NA	ASV_2301
Bacteria	Firmicutes	Bacilli	Bacillales	Alicyclobacillaceae	Tumebacillus	uous_taxa	ASV_2302
Bacteria	Gemmatimonadetes	Gemmatimonadetes	Gemmatimonadales	Gemmatimonadaceae	Gemmatirosa	uncultured bacterium	ASV_2303
Bacteria	Acidobacteria	Acidobacteriia	Solibacterales	Solibacteraceae (Subgroup 3)	Bryobacter	NA	ASV_2304
Bacteria	Gemmatimonadetes	Longimicrobia	Longimicrobiales	Longimicrobiaceae	metagenome	metagenome	ASV_2305
Bacteria	Cyanobacteria	Oxyphotobacteria	Nostocales	Coleofasciculaceae	Microcoleus PCC-7113	uous_taxa	ASV_2307
Bacteria	Proteobacteria	Alphaproteobacteria	Rhodobacterales	Rhodobacteraceae	Paracoccus	NA	ASV_2308
Bacteria	Fusobacteria	Fusobacteriia	Fusobacteriales	Fusobacteriaceae	Fusobacterium	NA	ASV_2310
Bacteria	Firmicutes	Erysipelotrichia	Erysipelotrichales	Erysipelotrichaceae	ZOR0006	NA	ASV_2311
Bacteria	Proteobacteria	Gammaproteobacteria	Diplorickettsiales	Diplorickettsiaceae	uncultured	uncultured bacterium	ASV_2315
Bacteria	Bacteroidetes	Bacteroidia	Chitinophagales	Chitinophagaceae	NA	NA	ASV_2330
Bacteria	Proteobacteria	Alphaproteobacteria	Rhizobiales	Methyloligellaceae	uous_taxa	uous_taxa	ASV_2331
Bacteria	Gemmatimonadetes	Gemmatimonadetes	Gemmatimonadales	Gemmatimonadaceae	uncultured	uncultured Pseudomonadales bacterium	ASV_2335
Bacteria	Chloroflexi	TK10	metagenome	metagenome	metagenome	metagenome	ASV_2336
Bacteria	Actinobacteria	Actinobacteria	Corynebacteriales	Tsukamurellaceae	Tsukamurella	NA	ASV_2338
Bacteria	Firmicutes	Clostridia	Clostridiales	Ruminococcaceae	Faecalibacterium	NA	ASV_2339
Bacteria	Firmicutes	Clostridia	Clostridiales	Ruminococcaceae	[Eubacterium] coprostanoligenes group	uncultured bacterium	ASV_2342
Bacteria	Kiritimatiellaeota	Kiritimatiellae	WCHB1-41	uncultured rumen bacterium	uncultured rumen bacterium	uncultured rumen bacterium	ASV_2343
Bacteria	Firmicutes	Erysipelotrichia	Erysipelotrichales	Erysipelotrichaceae	Erysipelotrichaceae UCG-004	NA	ASV_2344
Bacteria	Firmicutes	Negativicutes	Selenomonadales	Veillonellaceae	Quinella	uncultured bacterium	ASV_2345
Bacteria	Actinobacteria	Thermoleophilia	Solirubrobacterales	67-14	NA	NA	ASV_2346
Bacteria	Proteobacteria	Alphaproteobacteria	Acetobacterales	Acetobacteraceae	Roseomonas	uous_taxa	ASV_2348
Bacteria	Proteobacteria	Gammaproteobacteria	Betaproteobacteriales	Chitinimonadaceae	Chitinimonas	uous_taxa	ASV_2360
Bacteria	Proteobacteria	Gammaproteobacteria	Immundisolibacterales	Immundisolibacteraceae	Immundisolibacter	NA	ASV_2368
Bacteria	Bacteroidetes	Bacteroidia	Cytophagales	Hymenobacteraceae	Adhaeribacter	NA	ASV_2370
Bacteria	Deinococcus-Thermus	Deinococci	Deinococcales	Trueperaceae	Truepera	uncultured Thermus/Deinococcus group bacterium	ASV_2371
Bacteria	Actinobacteria	Actinobacteria	Propionibacteriales	Propionibacteriaceae	Tessaracoccus	uous_taxa	ASV_2376
Bacteria	Actinobacteria	Thermoleophilia	Solirubrobacterales	67-14	NA	NA	ASV_2377
Bacteria	Bacteroidetes	Bacteroidia	Bacteroidales	Rikenellaceae	Rikenellaceae RC9 gut group	uncultured bacterium	ASV_2378
Bacteria	Firmicutes	Clostridia	Clostridiales	Clostridiales vadinBB60 group	uncultured rumen bacterium	uncultured rumen bacterium	ASV_2379
Bacteria	Proteobacteria	Gammaproteobacteria	Betaproteobacteriales	Burkholderiaceae	Comamonas	NA	ASV_2380
Bacteria	Verrucomicrobia	Verrucomicrobiae	LD1-PB3	uous_taxa	uous_taxa	uous_taxa	ASV_2381
Bacteria	Planctomycetes	Planctomycetacia	Pirellulales	Pirellulaceae	p-1088-a5 gut group	uncultured bacterium	ASV_2384
Bacteria	Firmicutes	Clostridia	Clostridiales	Family XIII	NA	NA	ASV_2387
Bacteria	Kiritimatiellaeota	Kiritimatiellae	WCHB1-41	uncultured bacterium	uncultured bacterium	uncultured bacterium	ASV_2393
Bacteria	Firmicutes	Clostridia	Clostridiales	Family XIII	Family XIII AD3011 group	uncultured bacterium	ASV_2394
Bacteria	Spirochaetes	Spirochaetia	Spirochaetales	Spirochaetaceae	Treponema 2	bacterium WCE3006	ASV_2395
Bacteria	Firmicutes	Clostridia	Clostridiales	Christensenellaceae	Christensenellaceae R-7 group	NA	ASV_2398
Bacteria	Bacteroidetes	Bacteroidia	Bacteroidales	Rikenellaceae	Rikenellaceae RC9 gut group	NA	ASV_2399
Bacteria	Firmicutes	Clostridia	Clostridiales	Christensenellaceae	Christensenellaceae R-7 group	uncultured prokaryote	ASV_2400
Bacteria	Proteobacteria	Alphaproteobacteria	Caulobacterales	Caulobacteraceae	Brevundimonas	NA	ASV_2406
Bacteria	Actinobacteria	Actinobacteria	Micrococcales	Intrasporangiaceae	NA	NA	ASV_2407
Bacteria	FBP	uncultured bacterium	uncultured bacterium	uncultured bacterium	uncultured bacterium	uncultured bacterium	ASV_2408
Bacteria	Bacteroidetes	Bacteroidia	Cytophagales	Hymenobacteraceae	Hymenobacter	NA	ASV_2409
Bacteria	Bacteroidetes	Bacteroidia	Cytophagales	Hymenobacteraceae	Hymenobacter	Hymenobacter qilianensis	ASV_2411
Bacteria	Actinobacteria	Actinobacteria	Micrococcales	Microbacteriaceae	NA	NA	ASV_2412
Bacteria	Chloroflexi	Chloroflexia	Thermomicrobiales	JG30-KF-CM45	NA	NA	ASV_2413
Bacteria	Patescibacteria	Saccharimonadia	Saccharimonadales	NA	NA	NA	ASV_2414
Bacteria	Bacteroidetes	Bacteroidia	Chitinophagales	Chitinophagaceae	uncultured	NA	ASV_2415
Bacteria	Actinobacteria	Actinobacteria	Propionibacteriales	Propionibacteriaceae	Tessaracoccus	uous_taxa	ASV_2416
Bacteria	Actinobacteria	Actinobacteria	Streptomycetales	Streptomycetaceae	Streptomyces	NA	ASV_2417
Bacteria	Proteobacteria	Alphaproteobacteria	Sphingomonadales	Sphingomonadaceae	Sphingomonas	NA	ASV_2418
Bacteria	Proteobacteria	Alphaproteobacteria	Acetobacterales	Acetobacteraceae	NA	NA	ASV_2422
Bacteria	Proteobacteria	Gammaproteobacteria	Coxiellales	Coxiellaceae	Coxiella	NA	ASV_2425
Bacteria	Actinobacteria	Actinobacteria	Propionibacteriales	Propionibacteriaceae	Haloactinopolyspora	NA	ASV_2430
Bacteria	Proteobacteria	Alphaproteobacteria	Caulobacterales	Caulobacteraceae	Brevundimonas	NA	ASV_2431
Bacteria	Proteobacteria	Alphaproteobacteria	Caulobacterales	Caulobacteraceae	uncultured	NA	ASV_2432
Bacteria	Bacteroidetes	Bacteroidia	Flavobacteriales	Weeksellaceae	Elizabethkingia	uous_taxa	ASV_2433
Bacteria	Actinobacteria	Acidimicrobiia	IMCC26256	uous_taxa	uous_taxa	uous_taxa	ASV_2434
Bacteria	Firmicutes	Clostridia	Clostridiales	Ruminococcaceae	Pseudobacteroides	uncultured bacterium	ASV_2436
Bacteria	Firmicutes	Bacilli	Bacillales	Paenibacillaceae	Paenibacillus	NA	ASV_2439
Bacteria	Proteobacteria	Alphaproteobacteria	Rhizobiales	Stappiaceae	Agaricicola	uncultured bacterium	ASV_2449
Bacteria	Proteobacteria	Alphaproteobacteria	Rhizobiales	Methyloligellaceae	uncultured	NA	ASV_2453
Bacteria	Bacteroidetes	Bacteroidia	Cytophagales	Spirosomaceae	Leadbetterella	uncultured bacterium	ASV_2457
Bacteria	Proteobacteria	Alphaproteobacteria	Sphingomonadales	Sphingomonadaceae	Novosphingobium	NA	ASV_2471
Bacteria	Bacteroidetes	Bacteroidia	Sphingobacteriales	Sphingobacteriaceae	Sphingobacterium	Sphingobacterium sp. FS32	ASV_2473
Bacteria	Acidobacteria	Acidobacteriia	Acidobacteriales	uncultured	uous_taxa	uous_taxa	ASV_2485
Bacteria	Proteobacteria	Alphaproteobacteria	Rhodobacterales	Rhodobacteraceae	Rubellimicrobium	uncultured Rubellimicrobium sp.	ASV_2492
Bacteria	Actinobacteria	Actinobacteria	Frankiales	Geodermatophilaceae	Geodermatophilus	NA	ASV_2493
Bacteria	Actinobacteria	Actinobacteria	Micrococcales	Microbacteriaceae	NA	NA	ASV_2494
Bacteria	Proteobacteria	Alphaproteobacteria	Rhizobiales	Rhizobiaceae	Aminobacter	uncultured bacterium	ASV_2495
Bacteria	Firmicutes	Clostridia	Clostridiales	Lachnospiraceae	Lachnoclostridium	Coptotermes gestroi	ASV_2499
Bacteria	Acidobacteria	Acidobacteriia	Subgroup 2	NA	NA	NA	ASV_2500
Bacteria	Bacteroidetes	Bacteroidia	Sphingobacteriales	Sphingobacteriaceae	Sphingobacterium	Sphingobacterium sp. G2-10	ASV_2501
Bacteria	Proteobacteria	Gammaproteobacteria	Pseudomonadales	Pseudomonadaceae	Pseudomonas	NA	ASV_2502
Bacteria	Proteobacteria	Gammaproteobacteria	Betaproteobacteriales	Methylophilaceae	Methylobacillus	uous_taxa	ASV_2505
Bacteria	Firmicutes	Bacilli	Bacillales	Paenibacillaceae	Paenibacillus	Paenibacillus nanensis	ASV_2506
Bacteria	Proteobacteria	Alphaproteobacteria	Sphingomonadales	Sphingomonadaceae	Sphingobium	NA	ASV_2510
Bacteria	Actinobacteria	Actinobacteria	Corynebacteriales	Dietziaceae	Dietzia	uncultured bacterium	ASV_2511
Bacteria	Fusobacteria	Fusobacteriia	Fusobacteriales	Leptotrichiaceae	Leptotrichia	NA	ASV_2515
Bacteria	Proteobacteria	Alphaproteobacteria	Sphingomonadales	Sphingomonadaceae	Altererythrobacter	NA	ASV_2517
Bacteria	Bacteroidetes	Bacteroidia	Sphingobacteriales	Sphingobacteriaceae	Pedobacter	NA	ASV_2521
Bacteria	Proteobacteria	Gammaproteobacteria	Pseudomonadales	Moraxellaceae	Alkanindiges	NA	ASV_2522
Bacteria	Verrucomicrobia	Verrucomicrobiae	Chthoniobacterales	Chthoniobacteraceae	Chthoniobacter	NA	ASV_2523
Bacteria	Bacteroidetes	Bacteroidia	Chitinophagales	Chitinophagaceae	Pseudoflavitalea	NA	ASV_2524
Bacteria	Actinobacteria	Actinobacteria	Corynebacteriales	Mycobacteriaceae	Mycobacterium	NA	ASV_2525
Bacteria	Bacteroidetes	Bacteroidia	Chitinophagales	Chitinophagaceae	Taibaiella	uncultured bacterium	ASV_2526
Bacteria	Chloroflexi	KD4-96	NA	NA	NA	NA	ASV_2528
Bacteria	Cyanobacteria	Oxyphotobacteria	Nostocales	Chroococcidiopsaceae	uncultured	NA	ASV_2532
Bacteria	Acidobacteria	Acidobacteriia	Solibacterales	Solibacteraceae (Subgroup 3)	Bryobacter	NA	ASV_2534
Bacteria	Proteobacteria	Alphaproteobacteria	Sphingomonadales	Sphingomonadaceae	NA	NA	ASV_2535
Bacteria	Proteobacteria	Deltaproteobacteria	Oligoflexales	Oligoflexaceae	Oligoflexus	uncultured bacterium	ASV_2541
Bacteria	Actinobacteria	Acidimicrobiia	Microtrichales	Iamiaceae	Iamia	NA	ASV_2542
Bacteria	Gemmatimonadetes	Gemmatimonadetes	Gemmatimonadales	Gemmatimonadaceae	Gemmatimonas	uncultured bacterium	ASV_2543
Bacteria	Gemmatimonadetes	Longimicrobia	Longimicrobiales	Longimicrobiaceae	uncultured bacterium	uncultured bacterium	ASV_2548
Bacteria	Planctomycetes	Planctomycetacia	Gemmatales	Gemmataceae	Gemmata	NA	ASV_2554
Bacteria	Proteobacteria	Gammaproteobacteria	Betaproteobacteriales	A21b	uncultured bacterium	uncultured bacterium	ASV_2557
Bacteria	Proteobacteria	Gammaproteobacteria	Legionellales	Legionellaceae	Legionella	uncultured bacterium	ASV_2564
Bacteria	Chloroflexi	Anaerolineae	Anaerolineales	Anaerolineaceae	uncultured	uncultured Anaerolineaceae bacterium	ASV_2565
Bacteria	Planctomycetes	Planctomycetacia	Pirellulales	Pirellulaceae	uncultured	NA	ASV_2566
Bacteria	Chloroflexi	Chloroflexia	Thermomicrobiales	JG30-KF-CM45	uncultured Chloroflexi bacterium	uncultured Chloroflexi bacterium	ASV_2571
Bacteria	Bacteroidetes	Bacteroidia	Bacteroidales	Bacteroidaceae	Bacteroides	NA	ASV_2577
Bacteria	Firmicutes	Clostridia	Clostridiales	Lachnospiraceae	Lachnospiraceae UCG-001	uous_taxa	ASV_2578
Bacteria	Bacteroidetes	Bacteroidia	Chitinophagales	Chitinophagaceae	NA	NA	ASV_2579
Bacteria	Actinobacteria	Actinobacteria	Propionibacteriales	Nocardioidaceae	Marmoricola	NA	ASV_2581
Bacteria	Firmicutes	Clostridia	Clostridiales	Clostridiaceae 1	Clostridium sensu stricto 9	uncultured bacterium	ASV_2585
Bacteria	Proteobacteria	Deltaproteobacteria	Bdellovibrionales	Bacteriovoracaceae	Peredibacter	Bacteriovorax sp. EPC3	ASV_2589
Bacteria	Firmicutes	Bacilli	Bacillales	Planococcaceae	Domibacillus	NA	ASV_2597
Bacteria	Actinobacteria	Actinobacteria	Corynebacteriales	Corynebacteriaceae	NA	NA	ASV_2600
Bacteria	Proteobacteria	Gammaproteobacteria	Diplorickettsiales	Diplorickettsiaceae	Aquicella	NA	ASV_2604
Bacteria	Actinobacteria	Actinobacteria	Micrococcales	Micrococcaceae	Rothia	NA	ASV_2607
Bacteria	Proteobacteria	Alphaproteobacteria	Sphingomonadales	Sphingomonadaceae	Sphingomonas	Sphingomonas koreensis	ASV_2615
Bacteria	Proteobacteria	Gammaproteobacteria	Betaproteobacteriales	SC-I-84	NA	NA	ASV_2616
Bacteria	Firmicutes	Bacilli	Bacillales	Paenibacillaceae	Paenibacillus	NA	ASV_2619
Bacteria	Proteobacteria	Deltaproteobacteria	Myxococcales	NA	NA	NA	ASV_2620
Bacteria	Patescibacteria	Gracilibacteria	Candidatus Peregrinibacteria	uncultured bacterium	uncultured bacterium	uncultured bacterium	ASV_2623
Bacteria	Acidobacteria	Subgroup 6	NA	NA	NA	NA	ASV_2675
Bacteria	Verrucomicrobia	Verrucomicrobiae	Pedosphaerales	Pedosphaeraceae	metagenome	metagenome	ASV_2678
Bacteria	Actinobacteria	Actinobacteria	Propionibacteriales	Nocardioidaceae	NA	NA	ASV_2688
Bacteria	Proteobacteria	Alphaproteobacteria	Rhizobiales	Rhizobiaceae	Allorhizobium-Neorhizobium-Pararhizobium-Rhizobium	NA	ASV_2692
Bacteria	Actinobacteria	Acidimicrobiia	Microtrichales	Iamiaceae	Iamia	uous_taxa	ASV_2693
Bacteria	Proteobacteria	Gammaproteobacteria	Gammaproteobacteria Incertae Sedis	Unknown Family	Acidibacter	NA	ASV_2707
Bacteria	Actinobacteria	Acidimicrobiia	Microtrichales	Ilumatobacteraceae	Ilumatobacter	uous_taxa	ASV_2708
Bacteria	Patescibacteria	Saccharimonadia	Saccharimonadales	bacterium LWQ8	bacterium LWQ8	bacterium LWQ8	ASV_2709
Bacteria	Bacteroidetes	Bacteroidia	Cytophagales	Hymenobacteraceae	Hymenobacter	NA	ASV_2712
Bacteria	Actinobacteria	Actinobacteria	Propionibacteriales	Propionibacteriaceae	Friedmanniella	NA	ASV_2713
Bacteria	Actinobacteria	Thermoleophilia	Gaiellales	uncultured	NA	NA	ASV_2714
Bacteria	Actinobacteria	Acidimicrobiia	Microtrichales	uncultured	NA	NA	ASV_2716
Bacteria	Actinobacteria	Actinobacteria	Propionibacteriales	Propionibacteriaceae	Microlunatus	NA	ASV_2717
Bacteria	Chloroflexi	KD4-96	NA	NA	NA	NA	ASV_2719
Bacteria	Proteobacteria	Alphaproteobacteria	Rhodobacterales	Rhodobacteraceae	NA	NA	ASV_2720
Bacteria	Proteobacteria	Alphaproteobacteria	Acetobacterales	Acetobacteraceae	NA	NA	ASV_2721
Bacteria	Fusobacteria	Fusobacteriia	Fusobacteriales	Fusobacteriaceae	Fusobacterium	NA	ASV_2722
Bacteria	Proteobacteria	Gammaproteobacteria	Diplorickettsiales	Diplorickettsiaceae	uncultured	NA	ASV_2723
Bacteria	Gemmatimonadetes	Gemmatimonadetes	Gemmatimonadales	Gemmatimonadaceae	Gemmatimonas	NA	ASV_2724
Bacteria	Actinobacteria	Thermoleophilia	Solirubrobacterales	Solirubrobacteraceae	Solirubrobacter	uncultured bacterium	ASV_2725
Bacteria	Actinobacteria	Actinobacteria	Frankiales	Geodermatophilaceae	Geodermatophilus	NA	ASV_2726
Bacteria	Firmicutes	Clostridia	Clostridiales	Clostridiaceae 1	Clostridium sensu stricto 1	Clostridium beijerinckii	ASV_2727
Bacteria	Actinobacteria	Actinobacteria	Micromonosporales	Micromonosporaceae	Dactylosporangium	uous_taxa	ASV_2728
Bacteria	Firmicutes	Bacilli	Bacillales	Thermoactinomycetaceae	NA	NA	ASV_2731
Bacteria	Proteobacteria	Deltaproteobacteria	Bdellovibrionales	Bacteriovoracaceae	Peredibacter	uncultured bacterium	ASV_2733
Bacteria	Actinobacteria	Actinobacteria	Frankiales	uncultured	NA	NA	ASV_2734
Bacteria	Rokubacteria	NC10	Rokubacteriales	uncultured bacterium	uncultured bacterium	uncultured bacterium	ASV_2735
Bacteria	Actinobacteria	Actinobacteria	Catenulisporales	Catenulisporaceae	Catenulispora	uous_taxa	ASV_2737
Bacteria	Proteobacteria	Gammaproteobacteria	Diplorickettsiales	Diplorickettsiaceae	uncultured	Cordyceps cicadae BA-001	ASV_2739
Bacteria	Actinobacteria	Thermoleophilia	Solirubrobacterales	Solirubrobacteraceae	Conexibacter	NA	ASV_2741
Bacteria	Actinobacteria	Thermoleophilia	uncultured	uncultured bacterium	uncultured bacterium	uncultured bacterium	ASV_2756
Bacteria	Proteobacteria	Alphaproteobacteria	Rhizobiales	Rhizobiaceae	Aureimonas	NA	ASV_2761
Bacteria	Firmicutes	Bacilli	Bacillales	Paenibacillaceae	Paenibacillus	NA	ASV_2762
Bacteria	Proteobacteria	Deltaproteobacteria	Myxococcales	NA	NA	NA	ASV_2764
Bacteria	FBP	metagenome	metagenome	metagenome	metagenome	metagenome	ASV_2765
Bacteria	Actinobacteria	Actinobacteria	Micromonosporales	Micromonosporaceae	Catellatospora	NA	ASV_2767
Bacteria	Actinobacteria	Thermoleophilia	Gaiellales	uncultured	uncultured microorganism	uncultured microorganism	ASV_2768
Bacteria	Actinobacteria	Actinobacteria	Propionibacteriales	Nocardioidaceae	Aeromicrobium	uncultured bacterium	ASV_2769
Bacteria	Bacteroidetes	Bacteroidia	Cytophagales	Hymenobacteraceae	Hymenobacter	NA	ASV_2770
Bacteria	Firmicutes	Negativicutes	Selenomonadales	Veillonellaceae	Anaerospora	uous_taxa	ASV_2771
Bacteria	Actinobacteria	Thermoleophilia	Gaiellales	uncultured	uncultured actinobacterium	uncultured actinobacterium	ASV_2774
Bacteria	Proteobacteria	Alphaproteobacteria	Rhizobiales	Devosiaceae	NA	NA	ASV_2775
Bacteria	Planctomycetes	Planctomycetacia	Pirellulales	Pirellulaceae	uncultured	uncultured bacterium	ASV_2776
Bacteria	Bacteroidetes	Bacteroidia	Bacteroidales	p-251-o5	uncultured bacterium	uncultured bacterium	ASV_2778
Bacteria	Firmicutes	Bacilli	Bacillales	Paenibacillaceae	Paenibacillus	NA	ASV_2790
Bacteria	Proteobacteria	Deltaproteobacteria	Myxococcales	Polyangiaceae	Pajaroellobacter	metagenome	ASV_2802
Bacteria	Acidobacteria	Acidobacteriia	Solibacterales	Solibacteraceae (Subgroup 3)	Bryobacter	NA	ASV_2803
Bacteria	Proteobacteria	Alphaproteobacteria	Sphingomonadales	Sphingomonadaceae	Sphingobium	NA	ASV_2804
Bacteria	Proteobacteria	Gammaproteobacteria	Betaproteobacteriales	TRA3-20	NA	NA	ASV_2815
Bacteria	Planctomycetes	Planctomycetacia	Pirellulales	Pirellulaceae	Pir4 lineage	NA	ASV_2816
Bacteria	Actinobacteria	Actinobacteria	Frankiales	Geodermatophilaceae	Geodermatophilus	NA	ASV_2817
Bacteria	Chloroflexi	Gitt-GS-136	NA	NA	NA	NA	ASV_2829
Bacteria	Firmicutes	Bacilli	Bacillales	Alicyclobacillaceae	Tumebacillus	NA	ASV_2830
Bacteria	Firmicutes	Clostridia	Clostridiales	Ruminococcaceae	Ruminococcaceae UCG-014	NA	ASV_2835
Bacteria	Bacteroidetes	Bacteroidia	Bacteroidales	Bacteroidales RF16 group	uncultured bacterium	uncultured bacterium	ASV_2838
Bacteria	Bacteroidetes	Bacteroidia	Bacteroidales	F082	uncultured bacterium	uncultured bacterium	ASV_2839
Bacteria	Firmicutes	Clostridia	Clostridiales	Ruminococcaceae	uncultured	uncultured compost bacterium	ASV_2841
Bacteria	Tenericutes	Mollicutes	Anaeroplasmatales	Anaeroplasmataceae	Anaeroplasma	NA	ASV_2843
Bacteria	Firmicutes	Erysipelotrichia	Erysipelotrichales	Erysipelotrichaceae	Erysipelotrichaceae UCG-004	uncultured bacterium	ASV_2844
Bacteria	Bacteroidetes	Bacteroidia	Bacteroidales	Rikenellaceae	Rikenellaceae RC9 gut group	uncultured bacterium	ASV_2846
Bacteria	Firmicutes	Clostridia	Clostridiales	Ruminococcaceae	Ruminococcaceae UCG-010	NA	ASV_2847
Bacteria	Bacteroidetes	Bacteroidia	Bacteroidales	F082	NA	NA	ASV_2848
Bacteria	Spirochaetes	Spirochaetia	Spirochaetales	Spirochaetaceae	Treponema 2	NA	ASV_2850
Bacteria	Actinobacteria	Acidimicrobiia	Microtrichales	Iamiaceae	Iamia	NA	ASV_2858
Bacteria	Bacteroidetes	Bacteroidia	Chitinophagales	Chitinophagaceae	Segetibacter	NA	ASV_2859
Bacteria	Bacteroidetes	Bacteroidia	Chitinophagales	Chitinophagaceae	uncultured	NA	ASV_2866
Bacteria	Bacteroidetes	Bacteroidia	Bacteroidales	Muribaculaceae	uncultured bacterium	uncultured bacterium	ASV_2867
Bacteria	Firmicutes	Bacilli	Bacillales	Paenibacillaceae	Paenibacillus	Paenibacillus barengoltzii	ASV_2868
Bacteria	Actinobacteria	Thermoleophilia	Gaiellales	uncultured	metagenome	metagenome	ASV_2875
Bacteria	Chloroflexi	Chloroflexia	Thermomicrobiales	JG30-KF-CM45	NA	NA	ASV_2877
Bacteria	Actinobacteria	Actinobacteria	Propionibacteriales	Propionibacteriaceae	Cutibacterium	NA	ASV_2891
Bacteria	Actinobacteria	Actinobacteria	Micromonosporales	Micromonosporaceae	NA	NA	ASV_2892
Bacteria	Firmicutes	Bacilli	Bacillales	Bacillaceae	NA	NA	ASV_2894
Bacteria	Proteobacteria	Alphaproteobacteria	Rhizobiales	Rhizobiales Incertae Sedis	Nordella	uous_taxa	ASV_2897
Bacteria	Patescibacteria	Saccharimonadia	Saccharimonadales	Saccharimonadaceae	uncultured bacterium	uncultured bacterium	ASV_2899
Bacteria	Bacteroidetes	Bacteroidia	Cytophagales	Hymenobacteraceae	Hymenobacter	Amia calva (bowfin)	ASV_2904
Bacteria	Firmicutes	Bacilli	Bacillales	Paenibacillaceae	Cohnella	NA	ASV_2922
Bacteria	Actinobacteria	Actinobacteria	Streptomycetales	Streptomycetaceae	Streptomyces	uncultured compost bacterium	ASV_2923
Bacteria	Bacteroidetes	Bacteroidia	Sphingobacteriales	Sphingobacteriaceae	Sphingobacterium	Sphingobacterium spiritivorum	ASV_2924
Bacteria	Bacteroidetes	Bacteroidia	Bacteroidales	Bacteroidaceae	Bacteroides	NA	ASV_2938
Bacteria	Proteobacteria	Gammaproteobacteria	Orbales	Orbaceae	Gilliamella	uncultured bacterium	ASV_2941
Bacteria	Proteobacteria	Alphaproteobacteria	Sphingomonadales	Sphingomonadaceae	uncultured	uncultured Sphingomonadaceae bacterium	ASV_2942
Bacteria	Proteobacteria	Alphaproteobacteria	Sphingomonadales	Sphingomonadaceae	NA	NA	ASV_2953
Bacteria	Proteobacteria	Deltaproteobacteria	Myxococcales	Archangiaceae	Anaeromyxobacter	uncultured bacterium	ASV_2954
Bacteria	Verrucomicrobia	Verrucomicrobiae	Chthoniobacterales	Chthoniobacteraceae	Chthoniobacter	NA	ASV_2961
Bacteria	Rokubacteria	NC10	Rokubacteriales	uncultured bacterium	uncultured bacterium	uncultured bacterium	ASV_2967
Bacteria	Firmicutes	Bacilli	Bacillales	Alicyclobacillaceae	Tumebacillus	NA	ASV_2973
Bacteria	Firmicutes	Bacilli	Bacillales	Bacillaceae	Bacillus	Bacillus clausii	ASV_2990
Bacteria	Proteobacteria	Gammaproteobacteria	uncultured	uncultured bacterium	uncultured bacterium	uncultured bacterium	ASV_2992
Bacteria	Actinobacteria	Thermoleophilia	Gaiellales	Gaiellaceae	Gaiella	uncultured bacterium	ASV_2995
Bacteria	Proteobacteria	Gammaproteobacteria	Pseudomonadales	Pseudomonadaceae	Pseudomonas	Pseudomonas oryzihabitans	ASV_2996
Bacteria	Firmicutes	Bacilli	Bacillales	Bacillaceae	Bacillus	NA	ASV_2997
Bacteria	Proteobacteria	Alphaproteobacteria	Rhizobiales	Beijerinckiaceae	Microvirga	NA	ASV_2998
Bacteria	Bacteroidetes	Bacteroidia	Chitinophagales	Chitinophagaceae	Dinghuibacter	NA	ASV_3001
Bacteria	Actinobacteria	Acidimicrobiia	uncultured	uous_taxa	uous_taxa	uous_taxa	ASV_3006
Bacteria	Bacteroidetes	Bacteroidia	Cytophagales	Microscillaceae	uncultured	NA	ASV_3007
Bacteria	Actinobacteria	Actinobacteria	Corynebacteriales	Segniliparaceae	Segniliparus	uous_taxa	ASV_3010
Bacteria	Patescibacteria	Saccharimonadia	Saccharimonadales	uncultured bacterium	uncultured bacterium	uncultured bacterium	ASV_3022
Bacteria	Proteobacteria	Alphaproteobacteria	Rhodobacterales	Rhodobacteraceae	NA	NA	ASV_3023
Bacteria	Proteobacteria	Gammaproteobacteria	PLTA13	metagenome	metagenome	metagenome	ASV_3033
Bacteria	Proteobacteria	Gammaproteobacteria	Alteromonadales	Alteromonadaceae	Rheinheimera	NA	ASV_3038
Bacteria	Chloroflexi	Anaerolineae	Anaerolineales	Anaerolineaceae	uncultured	uncultured sludge bacterium H39	ASV_3039
Bacteria	Bacteroidetes	Bacteroidia	Flavobacteriales	Flavobacteriaceae	Flavobacterium	NA	ASV_3040
Bacteria	Acidobacteria	Subgroup 6	NA	NA	NA	NA	ASV_3043
Bacteria	Chloroflexi	Chloroflexia	Chloroflexales	Chloroflexaceae	FFCH7168	uncultured bacterium	ASV_3047
Bacteria	Cyanobacteria	Oxyphotobacteria	Nostocales	Nostocaceae	Dolichospermum NIES41	uous_taxa	ASV_3049
Bacteria	Actinobacteria	Actinobacteria	Micrococcales	Microbacteriaceae	Microbacterium	NA	ASV_3050
Bacteria	Proteobacteria	Alphaproteobacteria	SAR11 clade	Clade III	NA	NA	ASV_3051
Bacteria	Actinobacteria	Actinobacteria	Pseudonocardiales	Pseudonocardiaceae	Pseudonocardia	NA	ASV_3052
Bacteria	Gemmatimonadetes	Gemmatimonadetes	Gemmatimonadales	Gemmatimonadaceae	uncultured	uncultured Gemmatimonadetes bacterium	ASV_3053
Bacteria	Cyanobacteria	Oxyphotobacteria	Nostocales	Phormidiaceae	Planktothrix NIVA-CYA 15	uncultured bacterium	ASV_3054
Bacteria	Proteobacteria	Alphaproteobacteria	Sphingomonadales	Sphingomonadaceae	Novosphingobium	NA	ASV_3055
Bacteria	Proteobacteria	Alphaproteobacteria	Sphingomonadales	Sphingomonadaceae	Sphingomonas	NA	ASV_3057
Bacteria	Acidobacteria	Subgroup 6	NA	NA	NA	NA	ASV_3058
Bacteria	Proteobacteria	Deltaproteobacteria	Desulfovibrionales	Desulfovibrionaceae	Desulfovibrio	NA	ASV_3059
Bacteria	Proteobacteria	Gammaproteobacteria	Betaproteobacteriales	Nitrosomonadaceae	MND1	metagenome	ASV_3060
Bacteria	Firmicutes	Clostridia	Clostridiales	Family XI	Ezakiella	Finegoldia magna	ASV_3061
Bacteria	Bacteroidetes	Bacteroidia	Cytophagales	Spirosomaceae	Dyadobacter	NA	ASV_3062
Bacteria	Proteobacteria	Gammaproteobacteria	Betaproteobacteriales	Burkholderiaceae	NA	NA	ASV_3063
Bacteria	Firmicutes	Clostridia	Clostridiales	Lachnospiraceae	NA	NA	ASV_3065
Bacteria	Planctomycetes	Planctomycetacia	Pirellulales	Pirellulaceae	uncultured	uous_taxa	ASV_3069
Bacteria	Cyanobacteria	Oxyphotobacteria	Synechococcales	Cyanobiaceae	Cyanobium PCC-6307	metagenome	ASV_3089
Bacteria	Bacteroidetes	Bacteroidia	Flavobacteriales	Weeksellaceae	Chryseobacterium	NA	ASV_3095
Bacteria	Planctomycetes	Planctomycetacia	Gemmatales	Gemmataceae	Gemmata	uncultured bacterium	ASV_3097
Bacteria	Bacteroidetes	Bacteroidia	Cytophagales	Hymenobacteraceae	Hymenobacter	NA	ASV_3099
Bacteria	Proteobacteria	Alphaproteobacteria	Rhodobacterales	Rhodobacteraceae	uncultured	uncultured bacterium	ASV_3100
Bacteria	Chloroflexi	Anaerolineae	SBR1031	A4b	OLB13	uncultured bacterium	ASV_3106
Bacteria	Actinobacteria	Thermoleophilia	Gaiellales	uncultured	metagenome	metagenome	ASV_3110
Bacteria	Proteobacteria	Gammaproteobacteria	Betaproteobacteriales	Nitrosomonadaceae	MND1	NA	ASV_3112
Bacteria	Firmicutes	Bacilli	Lactobacillales	Aerococcaceae	Abiotrophia	uncultured bacterium	ASV_3115
Bacteria	Firmicutes	Negativicutes	Selenomonadales	Veillonellaceae	Veillonella	NA	ASV_3116
Bacteria	Bacteroidetes	Bacteroidia	Chitinophagales	Chitinophagaceae	Flavisolibacter	NA	ASV_3117
Bacteria	Acidobacteria	Acidobacteriia	Solibacterales	Solibacteraceae (Subgroup 3)	Bryobacter	NA	ASV_3118
Bacteria	Actinobacteria	Actinobacteria	Corynebacteriales	Corynebacteriaceae	Corynebacterium 1	NA	ASV_3119
Bacteria	Bacteroidetes	Bacteroidia	Cytophagales	Cytophagaceae	Rhodocytophaga	uncultured Rhodocytophaga sp.	ASV_3121
Bacteria	Firmicutes	Clostridia	Clostridiales	Ruminococcaceae	Butyricicoccus	NA	ASV_3122
Bacteria	Proteobacteria	Gammaproteobacteria	Betaproteobacteriales	Neisseriaceae	uncultured	NA	ASV_3123
Bacteria	Proteobacteria	Alphaproteobacteria	Rhizobiales	Beijerinckiaceae	Methylosinus	NA	ASV_3134
Bacteria	Actinobacteria	Actinobacteria	Pseudonocardiales	Pseudonocardiaceae	Pseudonocardia	uous_taxa	ASV_3135
Bacteria	Proteobacteria	Alphaproteobacteria	Rhizobiales	Rhizobiaceae	Aliihoeflea	uncultured Aliihoeflea sp.	ASV_3137
Bacteria	Proteobacteria	Gammaproteobacteria	Orbales	Orbaceae	Orbus	uous_taxa	ASV_3138
Bacteria	Bacteroidetes	Bacteroidia	Flavobacteriales	Weeksellaceae	Chryseobacterium	NA	ASV_3149
Bacteria	Proteobacteria	Deltaproteobacteria	Myxococcales	uncultured	uncultured bacterium	uncultured bacterium	ASV_3151
Bacteria	Bacteroidetes	Bacteroidia	Bacteroidales	Muribaculaceae	uncultured bacterium	uncultured bacterium	ASV_3156
Bacteria	Firmicutes	Clostridia	Clostridiales	Lachnospiraceae	NA	NA	ASV_3159
Bacteria	Planctomycetes	Planctomycetacia	Gemmatales	Gemmataceae	NA	NA	ASV_3160
Bacteria	Planctomycetes	Phycisphaerae	Tepidisphaerales	WD2101 soil group	uncultured bacterium	uncultured bacterium	ASV_3161
Bacteria	Firmicutes	Clostridia	Clostridiales	Clostridiaceae 1	Clostridium sensu stricto 12	NA	ASV_3166
Bacteria	Proteobacteria	Gammaproteobacteria	Steroidobacterales	Steroidobacteraceae	Steroidobacter	NA	ASV_3167
Bacteria	Nitrospirae	Nitrospira	Nitrospirales	Nitrospiraceae	Nitrospira	uncultured soil bacterium	ASV_3168
Bacteria	Actinobacteria	Actinobacteria	Micrococcales	Microbacteriaceae	Rathayibacter	uous_taxa	ASV_3176
Bacteria	Actinobacteria	Actinobacteria	Micrococcales	Micrococcaceae	Arthrobacter	NA	ASV_3193
Bacteria	Proteobacteria	Gammaproteobacteria	Xanthomonadales	Xanthomonadaceae	Luteimonas	NA	ASV_3194
Bacteria	Verrucomicrobia	Verrucomicrobiae	Verrucomicrobiales	Verrucomicrobiaceae	Prosthecobacter	uncultured bacterium	ASV_3195
Bacteria	Gemmatimonadetes	Gemmatimonadetes	Gemmatimonadales	Gemmatimonadaceae	uncultured	uncultured soil bacterium	ASV_3196
Bacteria	Proteobacteria	Gammaproteobacteria	R7C24	metagenome	metagenome	metagenome	ASV_3198
Bacteria	Proteobacteria	Gammaproteobacteria	Betaproteobacteriales	Nitrosomonadaceae	Nitrosomonas	NA	ASV_3199
Bacteria	Firmicutes	Bacilli	Bacillales	Family XII	Exiguobacterium	NA	ASV_3203
Bacteria	Fibrobacteres	Fibrobacteria	Fibrobacterales	Fibrobacteraceae	possible genus 04	uncultured bacterium	ASV_3214
Bacteria	Firmicutes	Bacilli	Bacillales	Alicyclobacillaceae	Tumebacillus	NA	ASV_3275
Bacteria	Actinobacteria	Actinobacteria	Bifidobacteriales	Bifidobacteriaceae	Bifidobacterium	NA	ASV_3276
Bacteria	Gemmatimonadetes	Gemmatimonadetes	Gemmatimonadales	Gemmatimonadaceae	uncultured	Gemmatimonadetes bacterium WY71	ASV_3286
Bacteria	Planctomycetes	Planctomycetacia	Pirellulales	Pirellulaceae	Pirellula	uncultured Pasteuria sp.	ASV_3287
Bacteria	Actinobacteria	Actinobacteria	Micrococcales	Micrococcaceae	Micrococcus	NA	ASV_3288
Bacteria	Firmicutes	Bacilli	Bacillales	Paenibacillaceae	Paenibacillus	NA	ASV_3292
Bacteria	Proteobacteria	Alphaproteobacteria	Rhizobiales	Rhizobiaceae	NA	NA	ASV_3300
Bacteria	Gemmatimonadetes	Gemmatimonadetes	Gemmatimonadales	Gemmatimonadaceae	Gemmatirosa	uncultured bacterium	ASV_3301
Bacteria	Proteobacteria	Deltaproteobacteria	Myxococcales	NA	NA	NA	ASV_3302
Bacteria	Chloroflexi	Dehalococcoidia	S085	metagenome	metagenome	metagenome	ASV_3303
Bacteria	Firmicutes	Clostridia	Clostridiales	Ruminococcaceae	Anaerobacterium	uncultured bacterium	ASV_3307
Bacteria	Actinobacteria	Actinobacteria	Micrococcales	Intrasporangiaceae	Ornithinimicrobium	uous_taxa	ASV_3315
Bacteria	Firmicutes	Clostridia	Clostridiales	Peptococcaceae	Desulfosporosinus	NA	ASV_3316
Bacteria	Proteobacteria	Gammaproteobacteria	Betaproteobacteriales	Hydrogenophilaceae	Tepidiphilus	NA	ASV_3317
Bacteria	Firmicutes	Clostridia	Clostridiales	Clostridiaceae 1	NA	NA	ASV_3318
Bacteria	Firmicutes	Bacilli	Bacillales	Thermoactinomycetaceae	Thermoflavimicrobium	Thermoflavimicrobium dichotomicum	ASV_3319
Bacteria	Proteobacteria	Gammaproteobacteria	Steroidobacterales	Steroidobacteraceae	uncultured	NA	ASV_3320
Bacteria	Acidobacteria	Subgroup 6	NA	NA	NA	NA	ASV_3322
Bacteria	Actinobacteria	Acidimicrobiia	Microtrichales	Ilumatobacteraceae	uncultured	NA	ASV_3323
Bacteria	Proteobacteria	Gammaproteobacteria	Pasteurellales	Pasteurellaceae	NA	NA	ASV_3324
Bacteria	Proteobacteria	Deltaproteobacteria	Myxococcales	Polyangiaceae	Aetherobacter	NA	ASV_3325
Bacteria	Bacteroidetes	Bacteroidia	Bacteroidales	Bacteroidales RF16 group	uncultured bacterium	uncultured bacterium	ASV_3326
Bacteria	Actinobacteria	Thermoleophilia	uncultured	uncultured bacterium	uncultured bacterium	uncultured bacterium	ASV_3327
Bacteria	Chloroflexi	KD4-96	uncultured bacterium	uncultured bacterium	uncultured bacterium	uncultured bacterium	ASV_3328
Bacteria	Actinobacteria	Thermoleophilia	Solirubrobacterales	67-14	NA	NA	ASV_3330
Bacteria	Actinobacteria	Actinobacteria	Corynebacteriales	Corynebacteriaceae	Lawsonella	uous_taxa	ASV_3331
Bacteria	Gemmatimonadetes	Longimicrobia	Longimicrobiales	Longimicrobiaceae	uncultured bacterium	uncultured bacterium	ASV_3333
Bacteria	Actinobacteria	Actinobacteria	Streptosporangiales	Streptosporangiaceae	Nonomuraea	NA	ASV_3334
Bacteria	Actinobacteria	Thermoleophilia	Gaiellales	uncultured	uncultured actinobacterium	uncultured actinobacterium	ASV_3335
Bacteria	Actinobacteria	Acidimicrobiia	Microtrichales	Ilumatobacteraceae	uncultured	uncultured bacterium	ASV_3336
Bacteria	Planctomycetes	Planctomycetacia	Pirellulales	Pirellulaceae	uncultured	uncultured bacterium	ASV_3337
Bacteria	Actinobacteria	Acidimicrobiia	IMCC26256	uous_taxa	uous_taxa	uous_taxa	ASV_3339
Bacteria	Proteobacteria	Alphaproteobacteria	Sphingomonadales	Sphingomonadaceae	Sphingomonas	NA	ASV_3340
Bacteria	Proteobacteria	Alphaproteobacteria	Rhodobacterales	Rhodobacteraceae	Paracoccus	NA	ASV_3342
Bacteria	Actinobacteria	Thermoleophilia	Solirubrobacterales	Solirubrobacteraceae	Solirubrobacter	metagenome	ASV_3348
Bacteria	Firmicutes	Clostridia	Clostridiales	Lachnospiraceae	Oribacterium	NA	ASV_3350
Bacteria	Actinobacteria	Acidimicrobiia	IMCC26256	NA	NA	NA	ASV_3354
Bacteria	Actinobacteria	Thermoleophilia	Solirubrobacterales	67-14	uncultured actinobacterium	uncultured actinobacterium	ASV_3360
Bacteria	Firmicutes	Clostridia	Clostridiales	Ruminococcaceae	Ruminiclostridium 1	NA	ASV_3382
Bacteria	Firmicutes	Negativicutes	Selenomonadales	Veillonellaceae	Megamonas	NA	ASV_3384
Bacteria	Proteobacteria	Alphaproteobacteria	Rhizobiales	Xanthobacteraceae	uncultured	NA	ASV_3386
Bacteria	Firmicutes	Clostridia	Clostridiales	Ruminococcaceae	GCA-900066225	NA	ASV_3387
Bacteria	Firmicutes	Bacilli	Bacillales	Paenibacillaceae	Paenibacillus	NA	ASV_3388
Bacteria	Bacteroidetes	Bacteroidia	Cytophagales	Spirosomaceae	Dyadobacter	NA	ASV_3391
Bacteria	Actinobacteria	Acidimicrobiia	Microtrichales	Iamiaceae	Iamia	uncultured bacterium	ASV_3394
Bacteria	Planctomycetes	Pla4 lineage	NA	NA	NA	NA	ASV_3399
Bacteria	Planctomycetes	Planctomycetacia	Gemmatales	Gemmataceae	Gemmata	NA	ASV_3401
Bacteria	Acidobacteria	Subgroup 6	NA	NA	NA	NA	ASV_3402
Bacteria	Proteobacteria	Deltaproteobacteria	Oligoflexales	0319-6G20	uncultured gamma proteobacterium	uncultured gamma proteobacterium	ASV_3403
Bacteria	Actinobacteria	Actinobacteria	Propionibacteriales	Nocardioidaceae	Nocardioides	NA	ASV_3404
Bacteria	Actinobacteria	Actinobacteria	Propionibacteriales	Nocardioidaceae	Nocardioides	uncultured organism	ASV_3405
Bacteria	Tenericutes	Mollicutes	Mollicutes RF39	NA	NA	NA	ASV_3407
Bacteria	Firmicutes	Clostridia	Clostridiales	Family XIII	Anaerovorax	uous_taxa	ASV_3413
Bacteria	Firmicutes	Clostridia	Clostridiales	Clostridiaceae 1	Clostridium sensu stricto 1	NA	ASV_3415
Bacteria	Firmicutes	Clostridia	Clostridiales	Lachnospiraceae	Lachnoclostridium 10	uncultured bacterium	ASV_3417
Bacteria	Proteobacteria	Deltaproteobacteria	SAR324 clade(Marine group B)	NA	NA	NA	ASV_3420
Bacteria	Proteobacteria	Alphaproteobacteria	Rhizobiales	Rhodomicrobiaceae	Rhodomicrobium	NA	ASV_3469
Bacteria	Bacteroidetes	Bacteroidia	Chitinophagales	Chitinophagaceae	Flaviaesturariibacter	uncultured bacterium	ASV_3470
Bacteria	Firmicutes	Bacilli	Bacillales	Paenibacillaceae	Ammoniphilus	uncultured bacterium	ASV_3471
Bacteria	Firmicutes	Bacilli	Lactobacillales	Streptococcaceae	Streptococcus	Streptococcus mutans	ASV_3472
Bacteria	Proteobacteria	Alphaproteobacteria	Sphingomonadales	Sphingomonadaceae	Sphingomonas	NA	ASV_3473
Bacteria	Firmicutes	Erysipelotrichia	Erysipelotrichales	Erysipelotrichaceae	Erysipelotrichaceae UCG-004	uncultured bacterium	ASV_3489
Bacteria	Firmicutes	Clostridia	Clostridiales	Christensenellaceae	Christensenellaceae R-7 group	uncultured bacterium	ASV_3493
Bacteria	Bacteroidetes	Bacteroidia	Bacteroidales	p-251-o5	uncultured bacterium	uncultured bacterium	ASV_3495
Bacteria	Proteobacteria	Deltaproteobacteria	PB19	uncultured bacterium	uncultured bacterium	uncultured bacterium	ASV_3496
Bacteria	Chloroflexi	Anaerolineae	Anaerolineales	Anaerolineaceae	Flexilinea	uncultured bacterium	ASV_3498
Bacteria	Firmicutes	Bacilli	Bacillales	Alicyclobacillaceae	Tumebacillus	NA	ASV_3512
Bacteria	Actinobacteria	Rubrobacteria	Rubrobacterales	Rubrobacteriaceae	Rubrobacter	NA	ASV_3513
Bacteria	Actinobacteria	Actinobacteria	Propionibacteriales	Propionibacteriaceae	NA	NA	ASV_3514
Bacteria	Firmicutes	Bacilli	Lactobacillales	NA	NA	NA	ASV_3515
Bacteria	Proteobacteria	Alphaproteobacteria	Tistrellales	Geminicoccaceae	uncultured	NA	ASV_3518
Bacteria	Proteobacteria	Deltaproteobacteria	Bdellovibrionales	Bacteriovoracaceae	Peredibacter	NA	ASV_3519
Bacteria	Patescibacteria	Saccharimonadia	Saccharimonadales	NA	NA	NA	ASV_3521
Bacteria	Proteobacteria	Deltaproteobacteria	Myxococcales	Polyangiaceae	Pajaroellobacter	metagenome	ASV_3524
Bacteria	Actinobacteria	Thermoleophilia	Gaiellales	NA	NA	NA	ASV_3525
Bacteria	Actinobacteria	Actinobacteria	Corynebacteriales	Corynebacteriaceae	Corynebacterium 1	uncultured bacterium	ASV_3534
Bacteria	Acidobacteria	Blastocatellia (Subgroup 4)	Blastocatellales	Blastocatellaceae	NA	NA	ASV_3535
Bacteria	Firmicutes	Bacilli	Bacillales	Bacillaceae	Bacillus	Bacillus oleronius	ASV_3536
Bacteria	Proteobacteria	Alphaproteobacteria	Acetobacterales	Acetobacteraceae	Roseomonas	uncultured bacterium	ASV_3537
Bacteria	Planctomycetes	Planctomycetacia	Planctomycetales	uncultured	uous_taxa	uous_taxa	ASV_3538
Bacteria	Chloroflexi	Anaerolineae	Ardenticatenales	Ardenticatenaceae	uncultured	NA	ASV_3543
Bacteria	Actinobacteria	Thermoleophilia	uncultured	uncultured bacterium	uncultured bacterium	uncultured bacterium	ASV_3544
Bacteria	Cyanobacteria	Oxyphotobacteria	Nostocales	Chroococcidiopsaceae	Gloeocapsa PCC-7428	uous_taxa	ASV_3545
Bacteria	Proteobacteria	Gammaproteobacteria	Orbales	Orbaceae	Gilliamella	NA	ASV_3546
Bacteria	Bacteroidetes	Bacteroidia	Flavobacteriales	Flavobacteriaceae	Myroides	NA	ASV_3547
Bacteria	Bacteroidetes	Bacteroidia	Bacteroidales	Prevotellaceae	Prevotella 9	NA	ASV_3550
Bacteria	Actinobacteria	Actinobacteria	Micrococcales	Microbacteriaceae	NA	NA	ASV_3561
Bacteria	Patescibacteria	Saccharimonadia	Saccharimonadales	uncultured Candidatus Saccharibacteria bacterium	uncultured Candidatus Saccharibacteria bacterium	uncultured Candidatus Saccharibacteria bacterium	ASV_3566
Bacteria	Proteobacteria	Alphaproteobacteria	Rhizobiales	Beijerinckiaceae	Microvirga	uncultured bacterium	ASV_3569
Bacteria	Proteobacteria	Deltaproteobacteria	Myxococcales	Haliangiaceae	Haliangium	uncultured Myxococcales bacterium	ASV_3573
Bacteria	Acidobacteria	Blastocatellia (Subgroup 4)	Blastocatellales	Blastocatellaceae	uncultured	NA	ASV_3584
Bacteria	Bacteroidetes	Bacteroidia	Sphingobacteriales	Sphingobacteriaceae	Solitalea	uncultured bacterium	ASV_3588
Bacteria	Armatimonadetes	Fimbriimonadia	Fimbriimonadales	Fimbriimonadaceae	NA	NA	ASV_3602
Bacteria	Planctomycetes	Planctomycetacia	Gemmatales	Gemmataceae	Gemmata	NA	ASV_3603
Bacteria	Planctomycetes	Planctomycetacia	Gemmatales	Gemmataceae	uncultured	NA	ASV_3607
Bacteria	Actinobacteria	Actinobacteria	Frankiales	Cryptosporangiaceae	Fodinicola	uncultured bacterium	ASV_3609
Bacteria	Bacteroidetes	Bacteroidia	Chitinophagales	Chitinophagaceae	Dinghuibacter	NA	ASV_3613
Bacteria	Chloroflexi	Chloroflexia	Thermomicrobiales	JG30-KF-CM45	uncultured bacterium	uncultured bacterium	ASV_3625
Bacteria	Verrucomicrobia	Verrucomicrobiae	Verrucomicrobiales	Rubritaleaceae	Luteolibacter	NA	ASV_3660
Bacteria	Armatimonadetes	uncultured	uncultured bacterium	uncultured bacterium	uncultured bacterium	uncultured bacterium	ASV_3661
Bacteria	Planctomycetes	Planctomycetacia	Pirellulales	Pirellulaceae	Pirellula	NA	ASV_3668
Bacteria	Proteobacteria	Alphaproteobacteria	Rhodospirillales	uncultured	metagenome	metagenome	ASV_3669
Bacteria	Chloroflexi	Chloroflexia	Chloroflexales	Chloroflexaceae	Candidatus Chloroploca	NA	ASV_3674
Bacteria	Verrucomicrobia	Verrucomicrobiae	Pedosphaerales	Pedosphaeraceae	NA	NA	ASV_3698
Bacteria	Actinobacteria	Acidimicrobiia	Microtrichales	NA	NA	NA	ASV_3699
Bacteria	Proteobacteria	Deltaproteobacteria	SAR324 clade(Marine group B)	uncultured bacterium zdt-33i5	uncultured bacterium zdt-33i5	uncultured bacterium zdt-33i5	ASV_3702
Bacteria	Bacteroidetes	Bacteroidia	Sphingobacteriales	Sphingobacteriaceae	Mucilaginibacter	uncultured bacterium	ASV_3703
Bacteria	Chloroflexi	KD4-96	uous_taxa	uous_taxa	uous_taxa	uous_taxa	ASV_3731
Bacteria	Actinobacteria	Thermoleophilia	Solirubrobacterales	Solirubrobacteraceae	Patulibacter	uous_taxa	ASV_3732
Bacteria	Firmicutes	Bacilli	Bacillales	Paenibacillaceae	Paenibacillus	NA	ASV_3737
Bacteria	Chloroflexi	Chloroflexia	Chloroflexales	Herpetosiphonaceae	Herpetosiphon	NA	ASV_3738
Bacteria	Bacteroidetes	Bacteroidia	Chitinophagales	Chitinophagaceae	Asinibacterium	uncultured bacterium	ASV_3739
Bacteria	Proteobacteria	Alphaproteobacteria	Sphingomonadales	Sphingomonadaceae	Novosphingobium	NA	ASV_3744
Bacteria	Bacteroidetes	Bacteroidia	Flavobacteriales	Weeksellaceae	Chryseobacterium	NA	ASV_3745
Bacteria	Actinobacteria	Acidimicrobiia	Microtrichales	Iamiaceae	Iamia	NA	ASV_3746
Bacteria	Kiritimatiellaeota	Kiritimatiellae	WCHB1-41	uncultured bacterium	uncultured bacterium	uncultured bacterium	ASV_3747
Bacteria	Actinobacteria	Thermoleophilia	Solirubrobacterales	Solirubrobacteraceae	Solirubrobacter	NA	ASV_3748
Bacteria	Actinobacteria	Actinobacteria	Micromonosporales	Micromonosporaceae	Micromonospora	NA	ASV_3749
Bacteria	Proteobacteria	Gammaproteobacteria	Steroidobacterales	Steroidobacteraceae	Steroidobacter	NA	ASV_3752
Bacteria	Bacteroidetes	Bacteroidia	Cytophagales	Hymenobacteraceae	Hymenobacter	NA	ASV_3758
Bacteria	Firmicutes	Clostridia	Clostridiales	Clostridiaceae 1	Fonticella	Fonticella tunisiensis	ASV_3760
Bacteria	Firmicutes	Bacilli	Lactobacillales	Aerococcaceae	Aerococcus	NA	ASV_3765
Bacteria	Proteobacteria	Gammaproteobacteria	WN-HWB-116	uncultured bacterium	uncultured bacterium	uncultured bacterium	ASV_3766
Bacteria	Verrucomicrobia	Verrucomicrobiae	Pedosphaerales	Pedosphaeraceae	NA	NA	ASV_3767
Bacteria	Bacteroidetes	Bacteroidia	Cytophagales	Spirosomaceae	Larkinella	NA	ASV_3769
Bacteria	Bacteroidetes	Bacteroidia	Chitinophagales	Chitinophagaceae	Cnuella	NA	ASV_3770
Bacteria	Bacteroidetes	Bacteroidia	Chitinophagales	Chitinophagaceae	uncultured	NA	ASV_3772
Bacteria	Proteobacteria	Alphaproteobacteria	Rhodobacterales	Rhodobacteraceae	Rubellimicrobium	uncultured bacterium	ASV_3781
Bacteria	Actinobacteria	Actinobacteria	Propionibacteriales	Nocardioidaceae	Nocardioides	NA	ASV_3782
Bacteria	Bacteroidetes	Bacteroidia	Cytophagales	Hymenobacteraceae	Hymenobacter	NA	ASV_3783
Bacteria	Planctomycetes	Planctomycetacia	Isosphaerales	Isosphaeraceae	uncultured	uncultured Singulisphaera sp.	ASV_3796
Bacteria	Bacteroidetes	Bacteroidia	Bacteroidales	Muribaculaceae	NA	NA	ASV_3799
Bacteria	Bacteroidetes	Bacteroidia	Cytophagales	Hymenobacteraceae	Nibribacter	uncultured bacterium	ASV_3807
Bacteria	Bacteroidetes	Bacteroidia	Chitinophagales	Chitinophagaceae	Lacibacter	NA	ASV_3808
Bacteria	Actinobacteria	Thermoleophilia	Gaiellales	uncultured	NA	NA	ASV_3811
Bacteria	FBP	uncultured bacterium	uncultured bacterium	uncultured bacterium	uncultured bacterium	uncultured bacterium	ASV_3814
Bacteria	Spirochaetes	Spirochaetia	Spirochaetales	Spirochaetaceae	Treponema 2	Treponema sp. oral taxon 271	ASV_3821
Bacteria	Cyanobacteria	Oxyphotobacteria	Nostocales	Nostocaceae	Sphaerospermopsis BCCUSP55	uous_taxa	ASV_3824
Bacteria	Bacteroidetes	Rhodothermia	Rhodothermales	Rhodothermaceae	uncultured	NA	ASV_3827
Bacteria	Proteobacteria	NA	NA	NA	NA	NA	ASV_3845
Bacteria	Proteobacteria	Gammaproteobacteria	Betaproteobacteriales	uncultured	uncultured bacterium	uncultured bacterium	ASV_3846
Bacteria	Proteobacteria	Deltaproteobacteria	Bdellovibrionales	Bdellovibrionaceae	Bdellovibrio	NA	ASV_3878
Bacteria	Bacteroidetes	Bacteroidia	Chitinophagales	Saprospiraceae	uncultured	Ephemera danica	ASV_3879
Bacteria	Planctomycetes	Planctomycetacia	Pirellulales	Pirellulaceae	uncultured	NA	ASV_3880
Bacteria	Actinobacteria	Actinobacteria	Frankiales	Sporichthyaceae	hgcI clade	NA	ASV_3881
Bacteria	Planctomycetes	Phycisphaerae	Tepidisphaerales	WD2101 soil group	uncultured bacterium	uncultured bacterium	ASV_3893
Bacteria	Acidobacteria	Subgroup 6	NA	NA	NA	NA	ASV_3894
Bacteria	Acidobacteria	Acidobacteriia	Solibacterales	Solibacteraceae (Subgroup 3)	Bryobacter	NA	ASV_3895
Bacteria	Proteobacteria	Gammaproteobacteria	Betaproteobacteriales	Methylophilaceae	Methylobacillus	NA	ASV_3896
Bacteria	Gemmatimonadetes	Gemmatimonadetes	Gemmatimonadales	Gemmatimonadaceae	Gemmatirosa	uncultured bacterium	ASV_3901
Bacteria	Proteobacteria	Deltaproteobacteria	Bdellovibrionales	Bdellovibrionaceae	Bdellovibrio	uncultured bacterium	ASV_3905
Bacteria	Firmicutes	Clostridia	Clostridiales	Ruminococcaceae	[Eubacterium] coprostanoligenes group	uous_taxa	ASV_3913
Bacteria	Firmicutes	Clostridia	Clostridiales	Ruminococcaceae	Ruminococcaceae UCG-014	uncultured bacterium	ASV_3916
Bacteria	Chloroflexi	KD4-96	uous_taxa	uous_taxa	uous_taxa	uous_taxa	ASV_3917
Bacteria	Actinobacteria	Acidimicrobiia	Actinomarinales	uncultured	NA	NA	ASV_3918
Bacteria	Gemmatimonadetes	Longimicrobia	Longimicrobiales	Longimicrobiaceae	uncultured bacterium	uncultured bacterium	ASV_3920
Bacteria	Firmicutes	Clostridia	Clostridiales	Ruminococcaceae	Fastidiosipila	NA	ASV_3921
Bacteria	Planctomycetes	Planctomycetacia	Pirellulales	Pirellulaceae	uncultured	NA	ASV_3922
Bacteria	Patescibacteria	Saccharimonadia	Saccharimonadales	Saccharimonadaceae	NA	NA	ASV_3929
Bacteria	Bacteroidetes	Bacteroidia	Cytophagales	Cytophagaceae	Rhodocytophaga	uncultured bacterium	ASV_3935
Bacteria	Patescibacteria	Parcubacteria	uncultured Parcubacteria group bacterium	uncultured Parcubacteria group bacterium	uncultured Parcubacteria group bacterium	uncultured Parcubacteria group bacterium	ASV_3938
Bacteria	Bacteroidetes	Bacteroidia	Bacteroidales	Muribaculaceae	uncultured bacterium	uncultured bacterium	ASV_3956
Bacteria	Firmicutes	Clostridia	Clostridiales	Lachnospiraceae	uncultured	NA	ASV_3962
Bacteria	Actinobacteria	Actinobacteria	Bifidobacteriales	Bifidobacteriaceae	Bifidobacterium	NA	ASV_3963
Bacteria	Proteobacteria	Alphaproteobacteria	Rhizobiales	Hyphomicrobiaceae	Pedomicrobium	NA	ASV_3964
Bacteria	Proteobacteria	Gammaproteobacteria	Betaproteobacteriales	Nitrosomonadaceae	Ellin6067	NA	ASV_3965
Bacteria	Gemmatimonadetes	Gemmatimonadetes	Gemmatimonadales	Gemmatimonadaceae	uncultured	uous_taxa	ASV_3966
Bacteria	Firmicutes	Clostridia	Clostridiales	Ruminococcaceae	[Eubacterium] coprostanoligenes group	NA	ASV_3980
Bacteria	Bacteroidetes	Bacteroidia	Bacteroidales	Muribaculaceae	uncultured Bacteroidales bacterium	uncultured Bacteroidales bacterium	ASV_3981
Bacteria	Bacteroidetes	Bacteroidia	Chitinophagales	Chitinophagaceae	NA	NA	ASV_3985
Bacteria	Firmicutes	Clostridia	Clostridiales	Clostridiaceae 1	Clostridium sensu stricto 5	uncultured bacterium	ASV_4000
Bacteria	Bacteroidetes	Bacteroidia	Cytophagales	Spirosomaceae	Dyadobacter	NA	ASV_4002
Bacteria	Proteobacteria	Alphaproteobacteria	Caulobacterales	Caulobacteraceae	Brevundimonas	NA	ASV_4003
Bacteria	Verrucomicrobia	Verrucomicrobiae	Chthoniobacterales	Chthoniobacteraceae	Chthoniobacter	uncultured bacterium	ASV_4004
Bacteria	Bacteroidetes	Bacteroidia	Flavobacteriales	Flavobacteriaceae	Flavobacterium	NA	ASV_4005
Bacteria	Proteobacteria	Deltaproteobacteria	Bdellovibrionales	Bdellovibrionaceae	Bdellovibrio	uncultured bacterium	ASV_4007
Bacteria	Firmicutes	Negativicutes	Selenomonadales	Acidaminococcaceae	Phascolarctobacterium	NA	ASV_4008
Bacteria	Bacteroidetes	Bacteroidia	Flavobacteriales	Weeksellaceae	Cloacibacterium	NA	ASV_4009
Bacteria	Actinobacteria	Actinobacteria	Micrococcales	Dermabacteraceae	Brachybacterium	NA	ASV_4010
Bacteria	Actinobacteria	Acidimicrobiia	Microtrichales	uncultured	uous_taxa	uous_taxa	ASV_4016
Bacteria	Nitrospirae	Nitrospira	Nitrospirales	Nitrospiraceae	Nitrospira	uncultured organism	ASV_4020
Bacteria	Bacteroidetes	Bacteroidia	Flavobacteriales	Flavobacteriaceae	Gillisia	uncultured bacterium	ASV_4022
Bacteria	Bacteroidetes	Bacteroidia	Chitinophagales	Chitinophagaceae	uncultured	uncultured bacterium	ASV_4095
Bacteria	Proteobacteria	Deltaproteobacteria	Myxococcales	Haliangiaceae	Haliangium	uncultured prokaryote	ASV_4110
Bacteria	Verrucomicrobia	Verrucomicrobiae	Chthoniobacterales	Chthoniobacteraceae	Chthoniobacter	uncultured bacterium	ASV_4113
Bacteria	Proteobacteria	Alphaproteobacteria	NA	NA	NA	NA	ASV_4116
Bacteria	Firmicutes	Negativicutes	Selenomonadales	Veillonellaceae	Sporomusa	uncultured bacterium	ASV_4124
Bacteria	Bacteroidetes	Bacteroidia	Cytophagales	Hymenobacteraceae	Hymenobacter	uncultured bacterium	ASV_4130
Bacteria	Proteobacteria	Gammaproteobacteria	Pseudomonadales	Moraxellaceae	Moraxella	uncultured bacterium	ASV_4131
Bacteria	Bacteroidetes	Bacteroidia	Bacteroidales	Bacteroidaceae	Bacteroides	uncultured Bacteroidetes bacterium	ASV_4133
Bacteria	Planctomycetes	Planctomycetacia	Isosphaerales	Isosphaeraceae	NA	NA	ASV_4135
Bacteria	Planctomycetes	Phycisphaerae	Tepidisphaerales	WD2101 soil group	NA	NA	ASV_4136
Bacteria	Proteobacteria	Deltaproteobacteria	Oligoflexales	0319-6G20	NA	NA	ASV_4137
Bacteria	Proteobacteria	Gammaproteobacteria	Cellvibrionales	Halieaceae	OM60(NOR5) clade	NA	ASV_4138
Bacteria	Actinobacteria	Actinobacteria	Micrococcales	Intrasporangiaceae	Arsenicicoccus	uous_taxa	ASV_4139
Bacteria	Firmicutes	Clostridia	Clostridiales	Clostridiaceae 1	Clostridium sensu stricto 1	NA	ASV_4140
Bacteria	Chloroflexi	Chloroflexia	Thermomicrobiales	JG30-KF-CM45	metagenome	metagenome	ASV_4142
Bacteria	Proteobacteria	Deltaproteobacteria	Myxococcales	Archangiaceae	Anaeromyxobacter	uncultured bacterium	ASV_4143
Bacteria	Firmicutes	Clostridia	Clostridiales	Clostridiaceae 1	Clostridium sensu stricto 1	NA	ASV_4144
Bacteria	Gemmatimonadetes	Longimicrobia	Longimicrobiales	Longimicrobiaceae	uncultured bacterium	uncultured bacterium	ASV_4145
Bacteria	Gemmatimonadetes	Gemmatimonadetes	Gemmatimonadales	Gemmatimonadaceae	uncultured	uncultured proteobacterium	ASV_4146
Bacteria	Acidobacteria	Acidobacteriia	Acidobacteriales	Acidobacteriaceae (Subgroup 1)	Terriglobus	NA	ASV_4147
Bacteria	Bacteroidetes	Bacteroidia	Flavobacteriales	Flavobacteriaceae	Flavobacterium	NA	ASV_4148
Bacteria	Proteobacteria	Alphaproteobacteria	Acetobacterales	Acetobacteraceae	Roseomonas	uncultured Roseomonas sp.	ASV_4149
Bacteria	Proteobacteria	Deltaproteobacteria	Myxococcales	P3OB-42	uncultured bacterium	uncultured bacterium	ASV_4151
Bacteria	Acidobacteria	Subgroup 6	NA	NA	NA	NA	ASV_4152
Bacteria	Firmicutes	Bacilli	Bacillales	Thermoactinomycetaceae	Risungbinella	NA	ASV_4153
Bacteria	Actinobacteria	Acidimicrobiia	Microtrichales	uncultured	NA	NA	ASV_4158
Bacteria	Actinobacteria	Thermoleophilia	Solirubrobacterales	67-14	uncultured bacterium	uncultured bacterium	ASV_4185
Bacteria	Proteobacteria	Deltaproteobacteria	Myxococcales	Polyangiaceae	Pajaroellobacter	NA	ASV_4186
Bacteria	Firmicutes	Clostridia	Clostridiales	Lachnospiraceae	Roseburia	mouse gut metagenome	ASV_4189
Bacteria	Acidobacteria	Subgroup 6	NA	NA	NA	NA	ASV_4190
Bacteria	Actinobacteria	MB-A2-108	uncultured bacterium	uncultured bacterium	uncultured bacterium	uncultured bacterium	ASV_4200
Bacteria	Acidobacteria	Subgroup 17	NA	NA	NA	NA	ASV_4201
Bacteria	Actinobacteria	Thermoleophilia	Gaiellales	Gaiellaceae	Gaiella	NA	ASV_4206
Bacteria	Tenericutes	Mollicutes	Mycoplasmatales	Mycoplasmataceae	Mycoplasma	uncultured bacterium	ASV_4212
Bacteria	Actinobacteria	Acidimicrobiia	Microtrichales	Ilumatobacteraceae	CL500-29 marine group	metagenome	ASV_4234
Bacteria	Actinobacteria	Acidimicrobiia	Microtrichales	Iamiaceae	Iamia	uncultured bacterium	ASV_4254
Bacteria	Actinobacteria	Acidimicrobiia	Microtrichales	Iamiaceae	Iamia	NA	ASV_4280
Bacteria	Patescibacteria	Saccharimonadia	Saccharimonadales	NA	NA	NA	ASV_4294
Bacteria	Acidobacteria	Acidobacteriia	Solibacterales	Solibacteraceae (Subgroup 3)	Candidatus Solibacter	NA	ASV_4295
Bacteria	Bacteroidetes	Bacteroidia	Flavobacteriales	Flavobacteriaceae	Flavobacterium	Flavobacterium rivuli	ASV_4298
Bacteria	Cyanobacteria	Melainabacteria	Vampirovibrionales	uous_taxa	uous_taxa	uous_taxa	ASV_4300
Bacteria	Actinobacteria	Thermoleophilia	uncultured	uncultured bacterium	uncultured bacterium	uncultured bacterium	ASV_4311
Bacteria	Firmicutes	Clostridia	Clostridiales	Family XIII	Mogibacterium	uncultured rumen bacterium	ASV_4312
Bacteria	Actinobacteria	Actinobacteria	Actinomycetales	Actinomycetaceae	Actinomyces	unidentified	ASV_4316
Bacteria	Gemmatimonadetes	S0134 terrestrial group	uncultured Gemmatimonadetes bacterium	uncultured Gemmatimonadetes bacterium	uncultured Gemmatimonadetes bacterium	uncultured Gemmatimonadetes bacterium	ASV_4317
Bacteria	Firmicutes	Bacilli	Bacillales	Paenibacillaceae	Saccharibacillus	uncultured bacterium	ASV_4323
Bacteria	Gemmatimonadetes	Gemmatimonadetes	Gemmatimonadales	Gemmatimonadaceae	Gemmatimonas	uncultured bacterium	ASV_4331
Bacteria	Acidobacteria	Acidobacteriia	Solibacterales	Solibacteraceae (Subgroup 3)	Bryobacter	NA	ASV_4332
Bacteria	Acidobacteria	Thermoanaerobaculia	Thermoanaerobaculales	Thermoanaerobaculaceae	Subgroup 10	uncultured soil bacterium	ASV_4333
Bacteria	Actinobacteria	Acidimicrobiia	Microtrichales	uncultured	NA	NA	ASV_4342
Bacteria	Actinobacteria	Rubrobacteria	Rubrobacterales	Rubrobacteriaceae	Rubrobacter	NA	ASV_4344
Bacteria	Proteobacteria	Alphaproteobacteria	Rickettsiales	Rickettsiaceae	uncultured	uncultured bacterium	ASV_4351
Bacteria	Actinobacteria	Thermoleophilia	Gaiellales	uncultured	NA	NA	ASV_4352
Bacteria	Proteobacteria	Alphaproteobacteria	Caulobacterales	Hyphomonadaceae	SWB02	NA	ASV_4353
Bacteria	Bacteroidetes	Bacteroidia	Sphingobacteriales	Sphingobacteriaceae	Olivibacter	uous_taxa	ASV_4356
Bacteria	Actinobacteria	Thermoleophilia	Gaiellales	Gaiellaceae	Gaiella	NA	ASV_4375
Bacteria	Proteobacteria	Alphaproteobacteria	Rhizobiales	Pleomorphomonadaceae	Chthonobacter	NA	ASV_4377
Bacteria	Proteobacteria	Gammaproteobacteria	Salinisphaerales	Solimonadaceae	Polycyclovorans	uncultured bacterium	ASV_4378
Bacteria	Planctomycetes	Planctomycetacia	Pirellulales	Pirellulaceae	Pirellula	NA	ASV_4402
Bacteria	Bacteroidetes	Bacteroidia	Bacteroidales	Dysgonomonadaceae	Dysgonomonas	uncultured bacterium	ASV_4418
Bacteria	Firmicutes	Clostridia	Clostridiales	Clostridiaceae 1	Clostridium sensu stricto 8	uncultured bacterium	ASV_4443
Bacteria	Chloroflexi	Chloroflexia	Thermomicrobiales	JG30-KF-CM45	NA	NA	ASV_4444
Bacteria	Firmicutes	Clostridia	Clostridiales	Lachnospiraceae	[Ruminococcus] torques group	NA	ASV_4448
Bacteria	Proteobacteria	Deltaproteobacteria	Myxococcales	Haliangiaceae	Haliangium	NA	ASV_4480
Bacteria	FBP	NA	NA	NA	NA	NA	ASV_4486
Bacteria	Actinobacteria	Thermoleophilia	Gaiellales	uncultured	NA	NA	ASV_4490
Bacteria	Planctomycetes	Planctomycetacia	Gemmatales	Gemmataceae	Gemmata	NA	ASV_4494
Bacteria	Proteobacteria	Deltaproteobacteria	Myxococcales	uncultured	uncultured bacterium	uncultured bacterium	ASV_4497
Bacteria	Proteobacteria	Gammaproteobacteria	Diplorickettsiales	Diplorickettsiaceae	uncultured	uncultured proteobacterium	ASV_4498
Bacteria	Chlamydiae	Chlamydiae	Chlamydiales	Parachlamydiaceae	Candidatus Protochlamydia	uous_taxa	ASV_4499
Bacteria	Proteobacteria	Deltaproteobacteria	Bdellovibrionales	Bdellovibrionaceae	Bdellovibrio	Bdellovibrio sp. ETB	ASV_4500
Bacteria	Patescibacteria	Gracilibacteria	Absconditabacteriales (SR1)	uncultured prokaryote	uncultured prokaryote	uncultured prokaryote	ASV_4502
Bacteria	Firmicutes	Clostridia	Clostridiales	Christensenellaceae	Christensenellaceae R-7 group	NA	ASV_4504
Bacteria	Actinobacteria	Actinobacteria	Micrococcales	Micrococcaceae	Rothia	NA	ASV_4507

## Sheet: Table2
Supplementary table 2. List of taxa appearing at least once in western corn rootworm (Diabrotica virgifera virgifera) and northern corn rootworm (Diabrotica barberi)
asv.id	Kingdom	Phylum	Class	Order	Genus	Species
ASV_2	Bacteria	Proteobacteria	Gammaproteobacteria	Enterobacteriales	NA	NA
ASV_4	Bacteria	Firmicutes	Bacilli	Lactobacillales	Lactococcus	NA
ASV_5	Bacteria	Proteobacteria	Gammaproteobacteria	Enterobacteriales	Serratia	NA
ASV_7	Bacteria	Proteobacteria	Gammaproteobacteria	Enterobacteriales	NA	NA
ASV_8	Bacteria	Firmicutes	Bacilli	Lactobacillales	Enterococcus	NA
ASV_10	Bacteria	Proteobacteria	Gammaproteobacteria	Enterobacteriales	NA	NA
ASV_11	Bacteria	Proteobacteria	Gammaproteobacteria	Enterobacteriales	NA	NA
ASV_12	Bacteria	Proteobacteria	Gammaproteobacteria	Pseudomonadales	Pseudomonas	NA
ASV_13	Bacteria	Firmicutes	Bacilli	Lactobacillales	Weissella	NA
ASV_16	Bacteria	Proteobacteria	Gammaproteobacteria	Enterobacteriales	Pantoea	NA
ASV_20	Bacteria	Firmicutes	Bacilli	Lactobacillales	Lactococcus	Lactococcus garvieae subsp. garvieae
ASV_24	Bacteria	Actinobacteria	Actinobacteria	Corynebacteriales	Corynebacterium 1	NA
ASV_26	Bacteria	Firmicutes	Bacilli	Lactobacillales	Leuconostoc	NA
ASV_27	Bacteria	Proteobacteria	Gammaproteobacteria	Enterobacteriales	NA	NA
ASV_28	Bacteria	Proteobacteria	Gammaproteobacteria	Pseudomonadales	Acinetobacter	Acinetobacter calcoaceticus
ASV_29	Bacteria	Proteobacteria	Gammaproteobacteria	Pseudomonadales	Acinetobacter	NA
ASV_33	Bacteria	Proteobacteria	Gammaproteobacteria	Enterobacteriales	NA	NA
ASV_34	Bacteria	Proteobacteria	Gammaproteobacteria	Xanthomonadales	Stenotrophomonas	NA
ASV_35	Bacteria	Proteobacteria	Gammaproteobacteria	Enterobacteriales	NA	NA
ASV_38	Bacteria	Actinobacteria	Actinobacteria	Corynebacteriales	Corynebacterium 1	NA
ASV_41	Bacteria	Proteobacteria	Gammaproteobacteria	Pseudomonadales	Pseudomonas	NA
ASV_42	Bacteria	Proteobacteria	Gammaproteobacteria	Pseudomonadales	Pseudomonas	NA
ASV_44	Bacteria	Actinobacteria	Actinobacteria	Micrococcales	Microbacterium	NA
ASV_45	Bacteria	Firmicutes	Bacilli	Bacillales	Staphylococcus	NA
ASV_46	Bacteria	Proteobacteria	Gammaproteobacteria	Pseudomonadales	Acinetobacter	NA
ASV_47	Bacteria	Proteobacteria	Alphaproteobacteria	Sphingomonadales	Sphingomonas	NA
ASV_48	Bacteria	Proteobacteria	Gammaproteobacteria	Xanthomonadales	Stenotrophomonas	NA
ASV_50	Bacteria	Proteobacteria	Gammaproteobacteria	Pseudomonadales	Pseudomonas	NA
ASV_51	Bacteria	Proteobacteria	Gammaproteobacteria	Enterobacteriales	NA	NA
ASV_53	Bacteria	Proteobacteria	Gammaproteobacteria	Enterobacteriales	NA	NA
ASV_57	Bacteria	Firmicutes	Bacilli	Lactobacillales	Carnobacterium	NA
ASV_58	Bacteria	Firmicutes	Bacilli	Lactobacillales	Leuconostoc	NA
ASV_59	Bacteria	Proteobacteria	Gammaproteobacteria	Pseudomonadales	Pseudomonas	NA
ASV_60	Bacteria	Proteobacteria	Gammaproteobacteria	Pseudomonadales	Pseudomonas	NA
ASV_61	Bacteria	Proteobacteria	Gammaproteobacteria	Pseudomonadales	Pseudomonas	Pseudomonas oryzihabitans
ASV_62	Bacteria	Proteobacteria	Alphaproteobacteria	Sphingomonadales	Sphingomonas	NA
ASV_64	Bacteria	Proteobacteria	Gammaproteobacteria	Pseudomonadales	Pseudomonas	NA
ASV_67	Bacteria	Bacteroidetes	Bacteroidia	Flavobacteriales	Chryseobacterium	NA
ASV_68	Bacteria	Proteobacteria	Gammaproteobacteria	Pseudomonadales	Acinetobacter	NA
ASV_70	Bacteria	Actinobacteria	Actinobacteria	Corynebacteriales	Tsukamurella	NA
ASV_72	Bacteria	Proteobacteria	Gammaproteobacteria	Xanthomonadales	Stenotrophomonas	NA
ASV_73	Bacteria	Firmicutes	Bacilli	Lactobacillales	Lactococcus	uncultured bacterium
ASV_75	Bacteria	Firmicutes	Bacilli	Bacillales	Staphylococcus	NA
ASV_76	Bacteria	Bacteroidetes	Bacteroidia	Sphingobacteriales	Sphingobacterium	NA
ASV_77	Bacteria	Proteobacteria	Alphaproteobacteria	Rhizobiales	Ochrobactrum	NA
ASV_81	Bacteria	Actinobacteria	Actinobacteria	Corynebacteriales	Rhodococcus	NA
ASV_83	Bacteria	Firmicutes	Bacilli	Bacillales	Exiguobacterium	NA
ASV_85	Bacteria	Proteobacteria	Gammaproteobacteria	Enterobacteriales	NA	NA
ASV_86	Bacteria	Proteobacteria	Gammaproteobacteria	Pseudomonadales	Pseudomonas	NA
ASV_87	Bacteria	Proteobacteria	Gammaproteobacteria	Pseudomonadales	Pseudomonas	NA
ASV_88	Bacteria	Proteobacteria	Gammaproteobacteria	Enterobacteriales	NA	NA
ASV_89	Bacteria	Firmicutes	Bacilli	Lactobacillales	Enterococcus	NA
ASV_92	Bacteria	Bacteroidetes	Bacteroidia	Flavobacteriales	Chryseobacterium	NA
ASV_93	Bacteria	Bacteroidetes	Bacteroidia	Flavobacteriales	Chryseobacterium	NA
ASV_95	Bacteria	Proteobacteria	Alphaproteobacteria	Rhizobiales	Allorhizobium-Neorhizobium-Pararhizobium-Rhizobium	NA
ASV_97	Bacteria	Proteobacteria	Gammaproteobacteria	Enterobacteriales	NA	NA
ASV_102	Bacteria	Actinobacteria	Actinobacteria	Micrococcales	Microbacterium	NA
ASV_105	Bacteria	Actinobacteria	Actinobacteria	Micrococcales	Glutamicibacter	NA
ASV_108	Bacteria	Actinobacteria	Actinobacteria	Propionibacteriales	Cutibacterium	NA
ASV_111	Bacteria	Proteobacteria	Gammaproteobacteria	Enterobacteriales	NA	NA
ASV_112	Bacteria	Actinobacteria	Actinobacteria	Kineosporiales	Quadrisphaera	NA
ASV_114	Bacteria	Actinobacteria	Actinobacteria	Corynebacteriales	Gordonia	NA
ASV_115	Bacteria	Proteobacteria	Gammaproteobacteria	Betaproteobacteriales	Comamonas	NA
ASV_117	Bacteria	Actinobacteria	Actinobacteria	Micrococcales	Microbacterium	NA
ASV_119	Bacteria	Firmicutes	Bacilli	Lactobacillales	Enterococcus	NA
ASV_121	Bacteria	Actinobacteria	Actinobacteria	Micrococcales	Curtobacterium	NA
ASV_123	Bacteria	Firmicutes	Bacilli	Bacillales	Bacillus	NA
ASV_125	Bacteria	Actinobacteria	Actinobacteria	Micrococcales	Curtobacterium	NA
ASV_127	Bacteria	Actinobacteria	Actinobacteria	Corynebacteriales	Rhodococcus	NA
ASV_128	Bacteria	Firmicutes	Bacilli	Bacillales	Staphylococcus	NA
ASV_131	Bacteria	Actinobacteria	Actinobacteria	Corynebacteriales	Tsukamurella	uous_taxa
ASV_132	Bacteria	Proteobacteria	Alphaproteobacteria	Rhizobiales	Methylobacterium	NA
ASV_133	Bacteria	Proteobacteria	Alphaproteobacteria	Sphingomonadales	Sphingomonas	NA
ASV_134	Bacteria	Actinobacteria	Actinobacteria	Micrococcales	NA	NA
ASV_146	Bacteria	Proteobacteria	Alphaproteobacteria	Rhizobiales	Aureimonas	NA
ASV_152	Bacteria	Proteobacteria	Alphaproteobacteria	Caulobacterales	Brevundimonas	NA
ASV_155	Bacteria	Actinobacteria	Actinobacteria	Micrococcales	NA	NA
ASV_156	Bacteria	Proteobacteria	Alphaproteobacteria	Rhizobiales	Aureimonas	uous_taxa
ASV_157	Bacteria	Proteobacteria	Gammaproteobacteria	Betaproteobacteriales	NA	NA
ASV_159	Bacteria	Proteobacteria	Alphaproteobacteria	Rhizobiales	Methylobacterium	Methylobacterium aquaticum
ASV_165	Bacteria	Proteobacteria	Gammaproteobacteria	Betaproteobacteriales	Achromobacter	NA
ASV_166	Bacteria	Firmicutes	Bacilli	Lactobacillales	Weissella	NA
ASV_169	Bacteria	Proteobacteria	Gammaproteobacteria	Pseudomonadales	Pseudomonas	NA
ASV_172	Bacteria	Bacteroidetes	Bacteroidia	Cytophagales	Siphonobacter	uous_taxa
ASV_175	Bacteria	Proteobacteria	Alphaproteobacteria	Sphingomonadales	Sphingomonas	NA
ASV_177	Bacteria	Proteobacteria	Alphaproteobacteria	Rhizobiales	Methylobacterium	NA
ASV_178	Bacteria	Firmicutes	Bacilli	Lactobacillales	Leuconostoc	NA
ASV_180	Bacteria	Proteobacteria	Gammaproteobacteria	Betaproteobacteriales	NA	NA
ASV_182	Bacteria	Proteobacteria	Alphaproteobacteria	Rhizobiales	Allorhizobium-Neorhizobium-Pararhizobium-Rhizobium	NA
ASV_183	Bacteria	Actinobacteria	Actinobacteria	Corynebacteriales	Nocardia	NA
ASV_184	Bacteria	Proteobacteria	Gammaproteobacteria	Enterobacteriales	NA	NA
ASV_187	Bacteria	Proteobacteria	Alphaproteobacteria	Sphingomonadales	Sphingomonas	NA
ASV_194	Bacteria	Proteobacteria	Alphaproteobacteria	Rhizobiales	Bradyrhizobium	NA
ASV_198	Bacteria	Proteobacteria	Gammaproteobacteria	Enterobacteriales	NA	NA
ASV_200	Bacteria	Bacteroidetes	Bacteroidia	Sphingobacteriales	Sphingobacterium	Sphingobacterium multivorum
ASV_201	Bacteria	Proteobacteria	Gammaproteobacteria	Xanthomonadales	Stenotrophomonas	NA
ASV_204	Bacteria	Actinobacteria	Actinobacteria	Streptomycetales	Streptomyces	NA
ASV_205	Bacteria	Proteobacteria	Alphaproteobacteria	Rhizobiales	Aureimonas	uous_taxa
ASV_207	Bacteria	Bacteroidetes	Bacteroidia	Sphingobacteriales	Pedobacter	NA
ASV_208	Bacteria	Actinobacteria	Actinobacteria	Corynebacteriales	Nocardia	NA
ASV_211	Bacteria	Actinobacteria	Actinobacteria	Micrococcales	Microbacterium	NA
ASV_214	Bacteria	Proteobacteria	Gammaproteobacteria	Xanthomonadales	Stenotrophomonas	NA
ASV_215	Bacteria	Proteobacteria	Gammaproteobacteria	Pseudomonadales	Psychrobacter	Psychrobacter pulmonis
ASV_217	Bacteria	Actinobacteria	Actinobacteria	Micrococcales	Sanguibacter	uous_taxa
ASV_218	Bacteria	Bacteroidetes	Bacteroidia	Sphingobacteriales	Sphingobacterium	NA
ASV_219	Bacteria	Firmicutes	Bacilli	Lactobacillales	Streptococcus	NA
ASV_220	Bacteria	Firmicutes	Bacilli	Bacillales	Bacillus	NA
ASV_221	Bacteria	Proteobacteria	Gammaproteobacteria	Pseudomonadales	Acinetobacter	Acinetobacter lwoffii
ASV_222	Bacteria	Bacteroidetes	Bacteroidia	Flavobacteriales	Chryseobacterium	NA
ASV_223	Bacteria	Actinobacteria	Actinobacteria	Micrococcales	NA	NA
ASV_228	Bacteria	Bacteroidetes	Bacteroidia	Sphingobacteriales	Sphingobacterium	NA
ASV_230	Bacteria	Firmicutes	Bacilli	Bacillales	NA	NA
ASV_236	Bacteria	Proteobacteria	Gammaproteobacteria	Betaproteobacteriales	NA	NA
ASV_239	Bacteria	Proteobacteria	Gammaproteobacteria	Betaproteobacteriales	Delftia	NA
ASV_240	Bacteria	Proteobacteria	Gammaproteobacteria	Betaproteobacteriales	Burkholderia-Caballeronia-Paraburkholderia	NA
ASV_247	Bacteria	Firmicutes	Bacilli	Bacillales	Paenibacillus	Paenibacillus hunanensis
ASV_252	Bacteria	Bacteroidetes	Bacteroidia	Flavobacteriales	Chryseobacterium	NA
ASV_253	Bacteria	Bacteroidetes	Bacteroidia	Sphingobacteriales	Sphingobacterium	Sphingobacterium sp. 23D10-4-9
ASV_254	Bacteria	Firmicutes	Bacilli	Lactobacillales	NA	NA
ASV_257	Bacteria	Actinobacteria	Actinobacteria	Micrococcales	NA	NA
ASV_260	Bacteria	Actinobacteria	Actinobacteria	Micrococcales	Microbacterium	NA
ASV_261	Bacteria	Actinobacteria	Actinobacteria	Pseudonocardiales	Pseudonocardia	uous_taxa
ASV_264	Bacteria	Actinobacteria	Actinobacteria	Corynebacteriales	Corynebacterium 1	uncultured organism
ASV_272	Bacteria	Actinobacteria	Actinobacteria	Frankiales	Geodermatophilus	uous_taxa
ASV_277	Bacteria	Actinobacteria	Actinobacteria	Micrococcales	Microbacterium	NA
ASV_279	Bacteria	Firmicutes	Bacilli	Bacillales	Fictibacillus	NA
ASV_282	Bacteria	Proteobacteria	Alphaproteobacteria	Sphingomonadales	Sphingomonas	NA
ASV_283	Bacteria	Proteobacteria	Alphaproteobacteria	Acetobacterales	NA	NA
ASV_285	Bacteria	Proteobacteria	Gammaproteobacteria	Betaproteobacteriales	Burkholderia-Caballeronia-Paraburkholderia	NA
ASV_297	Bacteria	Proteobacteria	Alphaproteobacteria	Rhizobiales	Methylobacterium	NA
ASV_298	Bacteria	Proteobacteria	Gammaproteobacteria	Betaproteobacteriales	NA	NA
ASV_300	Bacteria	Bacteroidetes	Bacteroidia	Cytophagales	Siphonobacter	uous_taxa
ASV_302	Bacteria	Actinobacteria	Actinobacteria	Propionibacteriales	Aeromicrobium	NA
ASV_305	Bacteria	Actinobacteria	Actinobacteria	Corynebacteriales	Segniliparus	uous_taxa
ASV_306	Bacteria	Proteobacteria	Gammaproteobacteria	Betaproteobacteriales	Burkholderia-Caballeronia-Paraburkholderia	NA
ASV_308	Bacteria	Actinobacteria	Actinobacteria	Micrococcales	Microbacterium	NA
ASV_313	Bacteria	Proteobacteria	Alphaproteobacteria	Sphingomonadales	Sphingobium	NA
ASV_317	Bacteria	Proteobacteria	Alphaproteobacteria	Rhizobiales	Methylobacterium	NA
ASV_324	Bacteria	Actinobacteria	Actinobacteria	Kineosporiales	Kineococcus	NA
ASV_326	Bacteria	Proteobacteria	Alphaproteobacteria	Rhizobiales	Methylobacterium	NA
ASV_327	Bacteria	Actinobacteria	Actinobacteria	Micrococcales	Brachybacterium	NA
ASV_330	Bacteria	Proteobacteria	Alphaproteobacteria	Rhizobiales	Allorhizobium-Neorhizobium-Pararhizobium-Rhizobium	NA
ASV_334	Bacteria	Proteobacteria	Alphaproteobacteria	Rhizobiales	Allorhizobium-Neorhizobium-Pararhizobium-Rhizobium	NA
ASV_342	Bacteria	Actinobacteria	Actinobacteria	Corynebacteriales	Nocardia	uous_taxa
ASV_350	Bacteria	Actinobacteria	Actinobacteria	Micrococcales	Frigoribacterium	uous_taxa
ASV_353	Bacteria	Firmicutes	Bacilli	Bacillales	NA	NA
ASV_356	Bacteria	Proteobacteria	Gammaproteobacteria	Betaproteobacteriales	Massilia	NA
ASV_359	Bacteria	Actinobacteria	Actinobacteria	Corynebacteriales	Mycobacterium	NA
ASV_372	Bacteria	Actinobacteria	Actinobacteria	Streptomycetales	Streptomyces	NA
ASV_378	Bacteria	Proteobacteria	Alphaproteobacteria	Rhizobiales	Methylobacterium	NA
ASV_382	Bacteria	Proteobacteria	Gammaproteobacteria	Betaproteobacteriales	NA	NA
ASV_388	Bacteria	Proteobacteria	Alphaproteobacteria	Rhizobiales	Allorhizobium-Neorhizobium-Pararhizobium-Rhizobium	NA
ASV_398	Bacteria	Actinobacteria	Actinobacteria	Corynebacteriales	Lawsonella	NA
ASV_403	Bacteria	Actinobacteria	Actinobacteria	Micrococcales	Paenarthrobacter	NA
ASV_411	Bacteria	Actinobacteria	Actinobacteria	Corynebacteriales	Corynebacterium 1	Corynebacterium xerosis
ASV_412	Bacteria	Proteobacteria	Gammaproteobacteria	Pseudomonadales	Pseudomonas	NA
ASV_415	Bacteria	Bacteroidetes	Bacteroidia	Flavobacteriales	Chryseobacterium	NA
ASV_416	Bacteria	Proteobacteria	Alphaproteobacteria	Sphingomonadales	Sphingomonas	uncultured Sphingomonadaceae bacterium
ASV_420	Bacteria	Firmicutes	Clostridia	Clostridiales	Clostridium sensu stricto 1	NA
ASV_425	Bacteria	Actinobacteria	Actinobacteria	Corynebacteriales	Nocardia	NA
ASV_428	Bacteria	Proteobacteria	Gammaproteobacteria	Xanthomonadales	Xanthomonas	NA
ASV_439	Bacteria	Actinobacteria	Actinobacteria	Micrococcales	Kocuria	NA
ASV_441	Bacteria	Actinobacteria	Actinobacteria	Streptomycetales	Streptomyces	NA
ASV_442	Bacteria	Actinobacteria	Actinobacteria	Frankiales	Blastococcus	NA
ASV_443	Bacteria	Actinobacteria	Actinobacteria	Streptomycetales	Streptomyces	NA
ASV_448	Bacteria	Actinobacteria	Acidimicrobiia	Microtrichales	uncultured Actinomycetales bacterium	uncultured Actinomycetales bacterium
ASV_468	Bacteria	Firmicutes	Bacilli	Bacillales	Bacillus	NA
ASV_492	Bacteria	Firmicutes	Bacilli	Bacillales	Bacillus	NA
ASV_498	Bacteria	Firmicutes	Clostridia	Clostridiales	Paeniclostridium	uncultured bacterium
ASV_501	Bacteria	Firmicutes	Bacilli	Bacillales	Tumebacillus	NA
ASV_503	Bacteria	Actinobacteria	Actinobacteria	Micrococcales	Mycetocola	uous_taxa
ASV_504	Bacteria	Bacteroidetes	Bacteroidia	Flavobacteriales	Chryseobacterium	NA
ASV_509	Bacteria	Actinobacteria	Actinobacteria	Corynebacteriales	Nocardia	NA
ASV_511	Bacteria	Proteobacteria	Gammaproteobacteria	Betaproteobacteriales	Achromobacter	NA
ASV_522	Bacteria	Actinobacteria	Actinobacteria	Corynebacteriales	Corynebacterium 1	uncultured organism
ASV_524	Bacteria	Proteobacteria	Alphaproteobacteria	Acetobacterales	Asaia	NA
ASV_538	Bacteria	Actinobacteria	Actinobacteria	Streptomycetales	Streptomyces	NA
ASV_558	Bacteria	Firmicutes	Bacilli	Bacillales	NA	NA
ASV_559	Bacteria	Actinobacteria	Actinobacteria	Micrococcales	NA	NA
ASV_560	Bacteria	Actinobacteria	Thermoleophilia	Gaiellales	Gaiella	actinobacterium WWH12
ASV_566	Bacteria	Proteobacteria	Gammaproteobacteria	Aeromonadales	Oceanisphaera	uncultured bacterium
ASV_570	Bacteria	Actinobacteria	Actinobacteria	Micrococcales	NA	NA
ASV_572	Bacteria	Proteobacteria	Alphaproteobacteria	Acetobacterales	Roseomonas	uous_taxa
ASV_573	Bacteria	Actinobacteria	Actinobacteria	Micrococcales	NA	NA
ASV_580	Bacteria	Chloroflexi	KD4-96	uous_taxa	uous_taxa	uous_taxa
ASV_600	Bacteria	Deinococcus-Thermus	Deinococci	Deinococcales	Deinococcus	Deinococcus citri
ASV_612	Bacteria	Proteobacteria	Alphaproteobacteria	Acetobacterales	Roseomonas	NA
ASV_634	Bacteria	Bacteroidetes	Bacteroidia	Cytophagales	Hymenobacter	NA
ASV_646	Bacteria	Proteobacteria	Alphaproteobacteria	Azospirillales	Skermanella	NA
ASV_656	Bacteria	Actinobacteria	Actinobacteria	Pseudonocardiales	Actinomycetospora	uncultured bacterium
ASV_664	Bacteria	Bacteroidetes	Bacteroidia	Cytophagales	Hymenobacter	uncultured bacterium
ASV_669	Bacteria	Bacteroidetes	Bacteroidia	Flavobacteriales	Chryseobacterium	NA
ASV_674	Bacteria	Proteobacteria	Alphaproteobacteria	Sphingomonadales	Sphingopyxis	NA
ASV_675	Bacteria	Actinobacteria	Actinobacteria	Micrococcales	Clavibacter	NA
ASV_689	Bacteria	Firmicutes	Clostridia	Clostridiales	Peptoclostridium	uncultured bacterium
ASV_692	Bacteria	Bacteroidetes	Bacteroidia	Cytophagales	Hymenobacter	uncultured bacterium
ASV_695	Bacteria	Firmicutes	Bacilli	Bacillales	Bacillus	NA
ASV_706	Bacteria	Actinobacteria	Actinobacteria	Kineosporiales	Pseudokineococcus	uous_taxa
ASV_724	Bacteria	Actinobacteria	Thermoleophilia	Solirubrobacterales	uncultured Rubrobacteria bacterium	uncultured Rubrobacteria bacterium
ASV_732	Bacteria	Bacteroidetes	Bacteroidia	Chitinophagales	Taibaiella	uous_taxa
ASV_756	Bacteria	Proteobacteria	Gammaproteobacteria	Betaproteobacteriales	Burkholderia-Caballeronia-Paraburkholderia	NA
ASV_757	Bacteria	Actinobacteria	Actinobacteria	Micrococcales	Microbacterium	NA
ASV_760	Bacteria	Actinobacteria	Actinobacteria	Micrococcales	Terrabacter	uous_taxa
ASV_770	Bacteria	Actinobacteria	Actinobacteria	Propionibacteriales	Nocardioides	NA
ASV_778	Bacteria	Actinobacteria	Actinobacteria	Propionibacteriales	Marmoricola	NA
ASV_815	Bacteria	Actinobacteria	Thermoleophilia	Solirubrobacterales	Solirubrobacter	uncultured bacterium
ASV_826	Bacteria	Proteobacteria	Alphaproteobacteria	Rhodobacterales	Rubellimicrobium	uncultured bacterium
ASV_832	Bacteria	Actinobacteria	Actinobacteria	Micromonosporales	NA	NA
ASV_836	Bacteria	Actinobacteria	Actinobacteria	Frankiales	Nakamurella	NA
ASV_842	Bacteria	Actinobacteria	Actinobacteria	Propionibacteriales	Microlunatus	uous_taxa
ASV_847	Bacteria	Proteobacteria	Alphaproteobacteria	Rhizobiales	uous_taxa	uous_taxa
ASV_914	Bacteria	Firmicutes	Clostridia	Clostridiales	Clostridium sensu stricto 12	Clostridium magnum
ASV_915	Bacteria	Actinobacteria	Actinobacteria	Propionibacteriales	Nocardioides	NA
ASV_916	Bacteria	Proteobacteria	Gammaproteobacteria	Betaproteobacteriales	NA	NA
ASV_919	Bacteria	Actinobacteria	Actinobacteria	Micrococcales	Microbacterium	NA
ASV_924	Bacteria	Proteobacteria	Gammaproteobacteria	Betaproteobacteriales	Noviherbaspirillum	NA
ASV_984	Bacteria	Actinobacteria	Thermoleophilia	Gaiellales	NA	NA
ASV_1013	Bacteria	Actinobacteria	Actinobacteria	Corynebacteriales	Dietzia	NA
ASV_1021	Bacteria	Firmicutes	Clostridia	Clostridiales	Clostridium sensu stricto 13	NA
ASV_1029	Bacteria	Actinobacteria	Actinobacteria	Propionibacteriales	Marmoricola	NA
ASV_1064	Bacteria	Firmicutes	Bacilli	Bacillales	Paenibacillus	Paenibacillus glycanilyticus
ASV_1072	Bacteria	Proteobacteria	Alphaproteobacteria	Azospirillales	Skermanella	uncultured bacterium
ASV_1087	Bacteria	Bacteroidetes	Bacteroidia	Flavobacteriales	Weeksella	uous_taxa
ASV_1119	Bacteria	Verrucomicrobia	Verrucomicrobiae	Chthoniobacterales	Candidatus Udaeobacter	NA
ASV_1130	Bacteria	Gemmatimonadetes	Gemmatimonadetes	Gemmatimonadales	Gemmatimonas	uncultured Gemmatimonas sp.
ASV_1154	Bacteria	Actinobacteria	Actinobacteria	Micrococcales	Phycicoccus	NA
ASV_1188	Bacteria	Firmicutes	Clostridia	Clostridiales	Clostridium sensu stricto 1	NA
ASV_1212	Bacteria	Proteobacteria	Gammaproteobacteria	Betaproteobacteriales	Paenalcaligenes	uous_taxa
ASV_1252	Bacteria	Bacteroidetes	Bacteroidia	Flavobacteriales	Flavobacterium	NA
ASV_2169	Bacteria	Proteobacteria	Alphaproteobacteria	Sphingomonadales	Sphingobium	NA

## Sheet: Table3
Supplementary Table 3 Commonly occurring bacteria as defined by occurrence in at least 50% of samples. Separate tables refer in western corn rootworm (WCR), northern corn rootworm (NCR) and those shared between the two host species
WCR
Kingdom	Phylum	Class	Order	Family	Genus	Species	ASV
Bacteria	Proteobacteria	Gammaproteobacteria	Enterobacteriales	Enterobacteriaceae	NA	NA	ASV_2
Bacteria	Firmicutes	Bacilli	Lactobacillales	Streptococcaceae	Lactococcus	NA	ASV_4
Bacteria	Proteobacteria	Gammaproteobacteria	Enterobacteriales	Enterobacteriaceae	NA	NA	ASV_7
Bacteria	Proteobacteria	Gammaproteobacteria	Enterobacteriales	Enterobacteriaceae	NA	NA	ASV_11
Bacteria	Proteobacteria	Gammaproteobacteria	Enterobacteriales	Enterobacteriaceae	Pantoea	NA	ASV_16
Bacteria	Proteobacteria	Gammaproteobacteria	Pseudomonadales	Moraxellaceae	Acinetobacter	Acinetobacter calcoaceticus	ASV_28
Bacteria	Actinobacteria	Actinobacteria	Propionibacteriales	Propionibacteriaceae	Cutibacterium	NA	ASV_108
NCR
Kingdom	Phylum	Class	Order	Family	Genus	Species	ASV
Bacteria	Proteobacteria	Gammaproteobacteria	Enterobacteriales	Enterobacteriaceae	NA	NA	ASV_2
Bacteria	Firmicutes	Bacilli	Lactobacillales	Streptococcaceae	Lactococcus	NA	ASV_4
Bacteria	Proteobacteria	Gammaproteobacteria	Enterobacteriales	Enterobacteriaceae	NA	NA	ASV_11
Bacteria	Proteobacteria	Gammaproteobacteria	Enterobacteriales	Enterobacteriaceae	Pantoea	NA	ASV_16
Bacteria	Actinobacteria	Actinobacteria	Micrococcales	Microbacteriaceae	Microbacterium	NA	ASV_44
Bacteria	Proteobacteria	Gammaproteobacteria	Pseudomonadales	Moraxellaceae	Acinetobacter	NA	ASV_46
Bacteria	Proteobacteria	Alphaproteobacteria	Sphingomonadales	Sphingomonadaceae	Sphingomonas	NA	ASV_62
Shared
Kingdom	Phylum	Class	Order	Family	Genus	Species	ASV
Bacteria	Proteobacteria	Gammaproteobacteria	Enterobacteriales	Enterobacteriaceae	NA	NA	ASV_2
Bacteria	Firmicutes	Bacilli	Lactobacillales	Streptococcaceae	Lactococcus	NA	ASV_4
Bacteria	Proteobacteria	Gammaproteobacteria	Enterobacteriales	Enterobacteriaceae	NA	NA	ASV_11
Bacteria	Proteobacteria	Gammaproteobacteria	Enterobacteriales	Enterobacteriaceae	Pantoea	NA	ASV_16

## Sheet: Table4
Supplementary table 4 Alpha and beta diversity differences in rootworm species and location with Wolbachia present
Bray-Curtis
adonis(tss_rare_bray ~ Rootworm, data = sample_tss_rare)									permutest(betadisper(tss_rare_bray, sample_tss_rare$Rootworm))
	Df	SumsOfSqs	MeanSqs	F.Model	R2	Pr(>F)				Df	SumSq	MeanSq	F	N.Perm	Pr(>F)
Rootworm	1	11.188	11.1885	95.002	0.30745	0.001	***		Groups	1	4.0394	4.0394	67.435	999	0.001	***
Residuals	214	25.203	0.1178	0.69255					Residuals	214	12.8189	0.0599
Total	215	36.391	1
Jaccard
adonis(tss_rare_jaccard ~ Rootworm, data = sample_tss_rare)									permutest(betadisper(tss_rare_jaccard, sample_tss_rare$Rootworm))
	Df	SumsOfSqs	MeanSqs	F.Model	R2	Pr(>F)				Df	SumsOfSqs	MeanSqs	F.Model	R2	Pr(>F)
Rootworm	1	10.229	10.2291	67.706	0.24034	0.001	***		Groups	1	3.7819	3.7819	54.603	999	0.001	***
Residuals	214	32.331	0.1511	0.75966					Residuals	214	14.8221	0.0693
Total	215	42.56	1
Alpha diversity metrics with Wolbachia
Species	Metric	Mean	Standard Error
WCR
	Chao-1	28.42	1.88
	Inverse Simpson	1.42	0.05
NCR
	Chao-1	77.28	7.82
	Inverse Simpson	4.62	0.78
WCR location effect State
adonis2(formula = wcr2_bray ~ State, data = sample_wcr2)
	Df	SumOfSqs	R2	F	Pr(>F)
State	10	8.4963	0.54117	20.995	0.001	***
Residual	178	7.2035	0.45883
Total	188	15.6998	1
WCR total county effect
adonis2(wcr2_bray ~ County, data = sample_wcr2
	Df SumOfSqs	R2	F	Pr(>F)
County	23 8.8554	0.56404	9.2816	0.000999	***
Residual	165 6.8445	0.43596
Total	188 15.6998	1
WCR colorado county effect
adonis2(formula = colorado_bray ~ County, data = sample_colorado)
	Df	SumsOfSqs	MeanSqs	F.Model	R2	Pr(>F)
County	13	0.326	0.025077	1.2583	0.14559	0.158
Residuals	96	1.9132	0.019929		0.85441
Total	109	2.2392			1

## Sheet: Table5
Supplementary table 5. Pairwise differences between western corn rootworm beetles collected from different states based on Bray-curtis and Jaccard distances
Bray-Curtis																Jaccard
$parent_call																$parent_call
[1]	wcr_bray ~ State , strata = Null															[1]	wcr_jaccard ~ State , strata = Null
$CO_vs_KS																$CO_vs_KS
Permutation:	free															Permutation:	free
Number	of	permutations:	999													Number	of	permutations:	999
Terms	added	sequentially	(first	to	last)											Terms	added	sequentially	(first	to	last)
	Df	SumsOfSqs	MeanSqs	F.Model	R2	Pr(>F)											Df	SumsOfSqs	MeanSqs	F.Model	R2	Pr(>F)
State	1	0.5383	0.53829	1.7479	0.0177	0.096	.									State	1	0.573	0.57335	1.6074	0.0163	0.094	.
Residuals	97	29.8723	0.30796	0.9823												Residuals	97	34.6	0.3567	0.9837
Total	98	30.4106	1													Total	98	35.173	1
---																---
Signif.	codes:	0	‘***’	0.001	‘**’	0.01	‘*’	0.05	‘.’	0.1	‘	’	1			Signif.	codes:	0	‘***’	0.001	‘**’	0.01	‘*’	0.05	‘.’	0.1	‘	’	1
$CO_vs_AZ																$CO_vs_AZ
Permutation:	free															Permutation:	free
Number	of	permutations:	999													Number	of	permutations:	999
Terms	added	sequentially	(first	to	last)											Terms	added	sequentially	(first	to	last)
	Df	SumsOfSqs	MeanSqs	F.Model	R2	Pr(>F)											Df	SumsOfSqs	MeanSqs	F.Model	R2	Pr(>F)
State	1	0.5539	0.55388	1.941	0.02044	0.086	.									State	1	0.698	0.69817	2.0589	0.02166	0.032	*
Residuals	93	26.5385	0.28536	0.97956												Residuals	93	31.536	0.33909	0.97834
Total	94	27.0923	1													Total	94	32.234	1
---																---
Signif.	codes:	0	‘***’	0.001	‘**’	0.01	‘*’	0.05	‘.’	0.1	‘	’	1			Signif.	codes:	0	‘***’	0.001	‘**’	0.01	‘*’	0.05	‘.’	0.1	‘	’	1
$CO_vs_IL																$CO_vs_IL
Permutation:	free															Permutation:	free
Number	of	permutations:	999													Number	of	permutations:	999
Terms	added	sequentially	(first	to	last)											Terms	added	sequentially	(first	to	last)
	Df	SumsOfSqs	MeanSqs	F.Model	R2	Pr(>F)											Df	SumsOfSqs	MeanSqs	F.Model	R2	Pr(>F)
State	1	0.3011	0.30112	1.0017	0.01066	0.402										State	1	0.354	0.35416	1.0073	0.01072	0.395
Residuals	93	27.9572	0.30062	0.98934												Residuals	93	32.697	0.35158	0.98928
Total	94	28.2584	1													Total	94	33.051	1
$CO_vs_MI																$CO_vs_MI
Permutation:	free															Permutation:	free
Number	of	permutations:	999													Number	of	permutations:	999
Terms	added	sequentially	(first	to	last)											Terms	added	sequentially	(first	to	last)
	Df	SumsOfSqs	MeanSqs	F.Model	R2	Pr(>F)											Df	SumsOfSqs	MeanSqs	F.Model	R2	Pr(>F)
State	1	2.2894	2.2894	7.8245	0.07838	0.001	***									State	1	1.931	1.93101	5.573	0.05712	0.001	***
Residuals	92	26.9188	0.2926	0.92162												Residuals	92	31.877	0.34649	0.94288
Total	93	29.2082	1													Total	93	33.808	1
---																---
Signif.	codes:	0	‘***’	0.001	‘**’	0.01	‘*’	0.05	‘.’	0.1	‘	’	1			Signif.	codes:	0	‘***’	0.001	‘**’	0.01	‘*’	0.05	‘.’	0.1	‘	’	1
$CO_vs_NY																$CO_vs_NY
Permutation:	free															Permutation:	free
Number	of	permutations:	999													Number	of	permutations:	999
Terms	added	sequentially	(first	to	last)											Terms	added	sequentially	(first	to	last)
	Df	SumsOfSqs	MeanSqs	F.Model	R2	Pr(>F)											Df	SumsOfSqs	MeanSqs	F.Model	R2	Pr(>F)
State	1	1.0649	1.06489	3.798	0.03924	0.003	**									State	1	1.314	1.31353	3.951	0.04075	0.002	**
Residuals	93	26.0756	0.28038	0.96076												Residuals	93	30.918	0.33245	0.95925
Total	94	27.1405	1													Total	94	32.232	1
---																---
Signif.	codes:	0	‘***’	0.001	‘**’	0.01	‘*’	0.05	‘.’	0.1	‘	’	1			Signif.	codes:	0	‘***’	0.001	‘**’	0.01	‘*’	0.05	‘.’	0.1	‘	’	1
$CO_vs_PA																$CO_vs_PA
Permutation:	free															Permutation:	free
Number	of	permutations:	999													Number	of	permutations:	999
Terms	added	sequentially	(first	to	last)											Terms	added	sequentially	(first	to	last)
	Df	SumsOfSqs	MeanSqs	F.Model	R2	Pr(>F)											Df	SumsOfSqs	MeanSqs	F.Model	R2	Pr(>F)
State	1	2.4615	2.4615	8.8776	0.08714	0.001	***									State	1	2.743	2.74342	8.3964	0.08281	0.001	***
Residuals	93	25.7863	0.27727	0.91286												Residuals	93	30.386	0.32674	0.91719
Total	94	28.2478	1													Total	94	33.13	1
---																---
Signif.	codes:	0	‘***’	0.001	‘**’	0.01	‘*’	0.05	‘.’	0.1	‘	’	1			Signif.	codes:	0	‘***’	0.001	‘**’	0.01	‘*’	0.05	‘.’	0.1	‘	’	1
$CO_vs_TX																$CO_vs_TX
Permutation:	free															Permutation:	free
Number	of	permutations:	999													Number	of	permutations:	999
Terms	added	sequentially	(first	to	last)											Terms	added	sequentially	(first	to	last)
	Df	SumsOfSqs	MeanSqs	F.Model	R2	Pr(>F)											Df	SumsOfSqs	MeanSqs	F.Model	R2	Pr(>F)
State	1	0.421	0.42105	1.4469	0.016	0.155										State	1	0.4535	0.45355	1.3257	0.01468	0.182
Residuals	89	25.899	0.291	0.984												Residuals	89	30.4494	0.34213	0.98532
Total	90	26.32	1													Total	90	30.9029	1
$CO_vs_SD																$CO_vs_SD
Permutation:	free															Permutation:	free
Number	of	permutations:	999													Number	of	permutations:	999
Terms	added	sequentially	(first	to	last)											Terms	added	sequentially	(first	to	last)
	Df	SumsOfSqs	MeanSqs	F.Model	R2	Pr(>F)											Df	SumsOfSqs	MeanSqs	F.Model	R2	Pr(>F)
State	1	0.4065	0.40645	1.3661	0.01479	0.212										State	1	0.474	0.47381	1.3545	0.01467	0.137
Residuals	91	27.0747	0.29752	0.98521												Residuals	91	31.833	0.34981	0.98533
Total	92	27.4811	1													Total	92	32.306	1
$CO_vs_OH																$CO_vs_OH
Permutation:	free															Permutation:	free
Number	of	permutations:	999													Number	of	permutations:	999
Terms	added	sequentially	(first	to	last)											Terms	added	sequentially	(first	to	last)
	Df	SumsOfSqs	MeanSqs	F.Model	R2	Pr(>F)											Df	SumsOfSqs	MeanSqs	F.Model	R2	Pr(>F)
State	1	0.5235	0.5235	1.7188	0.01874	0.093	.									State	1	0.489	0.48949	1.3808	0.01511	0.165
Residuals	90	27.4113	0.30457	0.98126												Residuals	90	31.904	0.35449	0.98489
Total	91	27.9348	1													Total	91	32.394	1
---
Signif.	codes:	0	‘***’	0.001	‘**’	0.01	‘*’	0.05	‘.’	0.1	‘	’	1			$CO_vs_NE
																Permutation:	free
$CO_vs_NE																Number	of	permutations:	999
Permutation:	free
Number	of	permutations:	999													Terms	added	sequentially	(first	to	last)
Terms	added	sequentially	(first	to	last)												Df	SumsOfSqs	MeanSqs	F.Model	R2	Pr(>F)
																State	1	0.452	0.45234	1.2806	0.01388	0.197
	Df	SumsOfSqs	MeanSqs	F.Model	R2	Pr(>F)										Residuals	91	32.144	0.35323	0.98612
State	1	0.4568	0.45682	1.5088	0.01631	0.135										Total	92	32.597	1
Residuals	91	27.5514	0.30276	0.98369
Total	92	28.0083	1													$KS_vs_AZ
																Permutation:	free
$KS_vs_AZ																Number	of	permutations:	999
Permutation:	free
Number	of	permutations:	999													Terms	added	sequentially	(first	to	last)
Terms	added	sequentially	(first	to	last)												Df	SumsOfSqs	MeanSqs	F.Model	R2	Pr(>F)
																State	1	0.7834	0.78338	2.324	0.11435	0.02	*
	Df	SumsOfSqs	MeanSqs	F.Model	R2	Pr(>F)										Residuals	18	6.0675	0.33709	0.88565
State	1	0.7318	0.73176	2.5731	0.12507	0.031	*									Total	19	6.8509	1
Residuals	18	5.1189	0.28438	0.87493												---
Total	19	5.8507	1													Signif.	codes:	0	‘***’	0.001	‘**’	0.01	‘*’	0.05	‘.’	0.1	‘	’	1
---
Signif.	codes:	0	‘***’	0.001	‘**’	0.01	‘*’	0.05	‘.’	0.1	‘	’	1			$KS_vs_IL
																Permutation:	free
$KS_vs_IL																Number	of	permutations:	999
Permutation:	free
Number	of	permutations:	999													Terms	added	sequentially	(first	to	last)
Terms	added	sequentially	(first	to	last)												Df	SumsOfSqs	MeanSqs	F.Model	R2	Pr(>F)
																State	1	0.3396	0.3396	0.84558	0.04487	0.595
	Df	SumsOfSqs	MeanSqs	F.Model	R2	Pr(>F)										Residuals	18	7.2291	0.40162	0.95513
State	1	0.268	0.26801	0.73791	0.03938	0.648										Total	19	7.5687	1
Residuals	18	6.5377	0.36321	0.96062
Total	19	6.8057	1													$KS_vs_MI
																Permutation:	free
$KS_vs_MI																Number	of	permutations:	999
Permutation:	free
Number	of	permutations:	999													Terms	added	sequentially	(first	to	last)
Terms	added	sequentially	(first	to	last)												Df	SumsOfSqs	MeanSqs	F.Model	R2	Pr(>F)
																State	1	1.2517	1.25171	3.32	0.16338	0.001	***
	Df	SumsOfSqs	MeanSqs	F.Model	R2	Pr(>F)										Residuals	17	6.4094	0.37702	0.83662
State	1	1.4637	1.46373	4.5248	0.21022	0.001	***									Total	18	7.6611	1
Residuals	17	5.4993	0.32349	0.78978												---
Total	18	6.963	1													Signif.	codes:	0	‘***’	0.001	‘**’	0.01	‘*’	0.05	‘.’	0.1	‘	’	1
---
Signif.	codes:	0	‘***’	0.001	‘**’	0.01	‘*’	0.05	‘.’	0.1	‘	’	1			$KS_vs_NY
																Permutation:	free
$KS_vs_NY																Number	of	permutations:	999
Permutation:	free
Number	of	permutations:	999													Terms	added	sequentially	(first	to	last)
Terms	added	sequentially	(first	to	last)												Df	SumsOfSqs	MeanSqs	F.Model	R2	Pr(>F)
																State	1	1.3748	1.3748	4.5406	0.20144	0.001	***
	Df	SumsOfSqs	MeanSqs	F.Model	R2	Pr(>F)										Residuals	18	5.45	0.30278	0.79856
State	1	1.2981	1.29809	5.0183	0.21801	0.001	***									Total	19	6.8248	1
Residuals	18	4.6561	0.25867	0.78199												---
Total	19	5.9541	1													Signif.	codes:	0	‘***’	0.001	‘**’	0.01	‘*’	0.05	‘.’	0.1	‘	’	1
---
Signif.	codes:	0	‘***’	0.001	‘**’	0.01	‘*’	0.05	‘.’	0.1	‘	’	1			$KS_vs_PA
																Permutation:	free
$KS_vs_PA																Number	of	permutations:	999
Permutation:	free
Number	of	permutations:	999													Terms	added	sequentially	(first	to	last)
Terms	added	sequentially	(first	to	last)												Df	SumsOfSqs	MeanSqs	F.Model	R2	Pr(>F)
																State	1	1.2059	1.20589	4.4132	0.1969	0.001	***
	Df	SumsOfSqs	MeanSqs	F.Model	R2	Pr(>F)										Residuals	18	4.9184	0.27325	0.8031
State	1	0.9776	0.97759	4.0297	0.18292	0.005	**									Total	19	6.1243	1
Residuals	18	4.3668	0.2426	0.81708												---
Total	19	5.3443	1													Signif.	codes:	0	‘***’	0.001	‘**’	0.01	‘*’	0.05	‘.’	0.1	‘	’	1
---
Signif.	codes:	0	‘***’	0.001	‘**’	0.01	‘*’	0.05	‘.’	0.1	‘	’	1			$KS_vs_TX
																Permutation:	free
$KS_vs_TX																Number	of	permutations:	999
Permutation:	free
Number	of	permutations:	999													Terms	added	sequentially	(first	to	last)
Terms	added	sequentially	(first	to	last)												Df	SumsOfSqs	MeanSqs	F.Model	R2	Pr(>F)
																State	1	0.7693	0.76929	2.1621	0.13378	0.031	*
	Df	SumsOfSqs	MeanSqs	F.Model	R2	Pr(>F)										Residuals	14	4.9813	0.35581	0.86622
State	1	0.7516	0.75161	2.3489	0.14367	0.042	*									Total	15	5.7506	1
Residuals	14	4.4798	0.31999	0.85633												---
Total	15	5.2314	1													Signif.	codes:	0	‘***’	0.001	‘**’	0.01	‘*’	0.05	‘.’	0.1	‘	’	1
---
Signif.	codes:	0	‘***’	0.001	‘**’	0.01	‘*’	0.05	‘.’	0.1	‘	’	1			$KS_vs_SD
																Permutation:	free
$KS_vs_SD																Number	of	permutations:	999
Permutation:	free
Number	of	permutations:	999													Terms	added	sequentially	(first	to	last)
Terms	added	sequentially	(first	to	last)												Df	SumsOfSqs	MeanSqs	F.Model	R2	Pr(>F)
																State	1	0.4165	0.41649	1.047	0.06142	0.348
	Df	SumsOfSqs	MeanSqs	F.Model	R2	Pr(>F)										Residuals	16	6.3645	0.39778	0.93858
State	1	0.3895	0.38951	1.102	0.06444	0.332										Total	17	6.781	1
Residuals	16	5.6552	0.35345	0.93556
Total	17	6.0447	1													$KS_vs_OH
																Permutation:	free
$KS_vs_OH																Number	of	permutations:	999
Permutation:	free
Number	of	permutations:	999													Terms	added	sequentially	(first	to	last)
Terms	added	sequentially	(first	to	last)												Df	SumsOfSqs	MeanSqs	F.Model	R2	Pr(>F)
																State	1	0.3117	0.31169	0.72641	0.04619	0.663
	Df	SumsOfSqs	MeanSqs	F.Model	R2	Pr(>F)										Residuals	15	6.4363	0.42909	0.95381
State	1	0.3117	0.31169	0.78028	0.04945	0.55										Total	16	6.748	1
Residuals	15	5.9918	0.39945	0.95055
Total	16	6.3035	1													$KS_vs_NE
																Permutation:	free
$KS_vs_NE																Number	of	permutations:	999
Permutation:	free
Number	of	permutations:	999													Terms	added	sequentially	(first	to	last)
Terms	added	sequentially	(first	to	last)												Df	SumsOfSqs	MeanSqs	F.Model	R2	Pr(>F)
																State	1	0.4494	0.4494	1.077	0.06307	0.335
	Df	SumsOfSqs	MeanSqs	F.Model	R2	Pr(>F)										Residuals	16	6.6761	0.41726	0.93693
State	1	0.4262	0.42618	1.112	0.06498	0.364										Total	17	7.1256	1
Residuals	16	6.1319	0.38324	0.93502
Total	17	6.5581	1													$AZ_vs_IL
																Permutation:	free
$AZ_vs_IL																Number	of	permutations:	999
Permutation:	free
Number	of	permutations:	999													Terms	added	sequentially	(first	to	last)
Terms	added	sequentially	(first	to	last)												Df	SumsOfSqs	MeanSqs	F.Model	R2	Pr(>F)
																State	1	0.5124	0.51241	1.7225	0.10956	0.046	*
	Df	SumsOfSqs	MeanSqs	F.Model	R2	Pr(>F)										Residuals	14	4.1646	0.29747	0.89044
State	1	0.4179	0.41789	1.8261	0.11539	0.08	.									Total	15	4.677	1
Residuals	14	3.2038	0.22884	0.88461												---
Total	15	3.6217	1													Signif.	codes:	0	‘***’	0.001	‘**’	0.01	‘*’	0.05	‘.’	0.1	‘	’	1
---
Signif.	codes:	0	‘***’	0.001	‘**’	0.01	‘*’	0.05	‘.’	0.1	‘	’	1			$AZ_vs_MI
																Permutation:	free
$AZ_vs_MI																Number	of	permutations:	999
Permutation:	free
Number	of	permutations:	999													Terms	added	sequentially	(first	to	last)
Terms	added	sequentially	(first	to	last)												Df	SumsOfSqs	MeanSqs	F.Model	R2	Pr(>F)
																State	1	1.6271	1.6271	6.3237	0.32725	0.001	***
	Df	SumsOfSqs	MeanSqs	F.Model	R2	Pr(>F)										Residuals	13	3.345	0.2573	0.67275
State	1	1.8706	1.87063	11.23	0.46348	0.001	***									Total	14	4.9721	1
Residuals	13	2.1654	0.16657	0.53652												---
Total	14	4.036	1													Signif.	codes:	0	‘***’	0.001	‘**’	0.01	‘*’	0.05	‘.’	0.1	‘	’	1
---
Signif.	codes:	0	‘***’	0.001	‘**’	0.01	‘*’	0.05	‘.’	0.1	‘	’	1			$AZ_vs_NY
																Permutation:	free
$AZ_vs_NY																Number	of	permutations:	999
Permutation:	free
Number	of	permutations:	999													Terms	added	sequentially	(first	to	last)
Terms	added	sequentially	(first	to	last)												Df	SumsOfSqs	MeanSqs	F.Model	R2	Pr(>F)
																State	1	0.67873	0.67873	3.9832	0.2215	0.001	***
	Df	SumsOfSqs	MeanSqs	F.Model	R2	Pr(>F)										Residuals	14	2.38557	0.1704	0.7785
State	1	0.50139	0.50139	5.3091	0.27495	0.001	***									Total	15	3.0643	1
Residuals	14	1.32217	0.09444	0.72505												---
Total	15	1.82356	1													Signif.	codes:	0	‘***’	0.001	‘**’	0.01	‘*’	0.05	‘.’	0.1	‘	’	1
---
Signif.	codes:	0	‘***’	0.001	‘**’	0.01	‘*’	0.05	‘.’	0.1	‘	’	1			$AZ_vs_PA
																Permutation:	free
$AZ_vs_PA																Number	of	permutations:	999
Permutation:	free
Number	of	permutations:	999													Terms	added	sequentially	(first	to	last)
Terms	added	sequentially	(first	to	last)												Df	SumsOfSqs	MeanSqs	F.Model	R2	Pr(>F)
																State	1	1.7807	1.78071	13.447	0.48992	0.001	***
	Df	SumsOfSqs	MeanSqs	F.Model	R2	Pr(>F)										Residuals	14	1.854	0.13243	0.51008
State	1	1.6198	1.61975	21.955	0.61062	0.001	***									Total	15	3.6347	1
Residuals	14	1.0329	0.07378	0.38938												---
Total	15	2.6526	1													Signif.	codes:	0	‘***’	0.001	‘**’	0.01	‘*’	0.05	‘.’	0.1	‘	’	1
---
Signif.	codes:	0	‘***’	0.001	‘**’	0.01	‘*’	0.05	‘.’	0.1	‘	’	1			$AZ_vs_TX
																Permutation:	free
$AZ_vs_TX																Number	of	permutations:	999
Permutation:	free
Number	of	permutations:	999													Terms	added	sequentially	(first	to	last)
Terms	added	sequentially	(first	to	last)												Df	SumsOfSqs	MeanSqs	F.Model	R2	Pr(>F)
																State	1	0.49858	0.49858	2.601	0.20641	0.011	*
	Df	SumsOfSqs	MeanSqs	F.Model	R2	Pr(>F)										Residuals	10	1.91685	0.19169	0.79359
State	1	0.32942	0.32942	2.8747	0.22328	0.024	*									Total	11	2.41543	1
Residuals	10	1.14592	0.11459	0.77672												---
Total	11	1.47534	1													Signif.	codes:	0	‘***’	0.001	‘**’	0.01	‘*’	0.05	‘.’	0.1	‘	’	1
---
Signif.	codes:	0	‘***’	0.001	‘**’	0.01	‘*’	0.05	‘.’	0.1	‘	’	1			$AZ_vs_SD
																Permutation:	free
$AZ_vs_SD																Number	of	permutations:	999
Permutation:	free
Number	of	permutations:	999													Terms	added	sequentially	(first	to	last)
Terms	added	sequentially	(first	to	last)												Df	SumsOfSqs	MeanSqs	F.Model	R2	Pr(>F)
																State	1	0.5504	0.55036	2.0013	0.14294	0.03	*
	Df	SumsOfSqs	MeanSqs	F.Model	R2	Pr(>F)										Residuals	12	3.3001	0.275	0.85706
State	1	0.48836	0.48836	2.5246	0.17382	0.03	*									Total	13	3.8504	1
Residuals	12	2.32127	0.19344	0.82618												---
Total	13	2.80963	1													Signif.	codes:	0	‘***’	0.001	‘**’	0.01	‘*’	0.05	‘.’	0.1	‘	’	1
---
Signif.	codes:	0	‘***’	0.001	‘**’	0.01	‘*’	0.05	‘.’	0.1	‘	’	1			$AZ_vs_OH
																Permutation:	free
$AZ_vs_OH																Number	of	permutations:	999
Permutation:	free
Number	of	permutations:	999													Terms	added	sequentially	(first	to	last)
Terms	added	sequentially	(first	to	last)												Df	SumsOfSqs	MeanSqs	F.Model	R2	Pr(>F)
																State	1	0.7213	0.72126	2.353	0.17622	0.005	**
	Df	SumsOfSqs	MeanSqs	F.Model	R2	Pr(>F)										Residuals	11	3.3718	0.30653	0.82378
State	1	0.7008	0.70081	2.9004	0.20865	0.008	**									Total	12	4.0931	1
Residuals	11	2.6579	0.24163	0.79135												---
Total	12	3.3587	1													Signif.	codes:	0	‘***’	0.001	‘**’	0.01	‘*’	0.05	‘.’	0.1	‘	’	1
---
Signif.	codes:	0	‘***’	0.001	‘**’	0.01	‘*’	0.05	‘.’	0.1	‘	’	1			$AZ_vs_NE
																Permutation:	free
$AZ_vs_NE																Number	of	permutations:	999
Permutation:	free
Number	of	permutations:	999													Terms	added	sequentially	(first	to	last)
Terms	added	sequentially	(first	to	last)												Df	SumsOfSqs	MeanSqs	F.Model	R2	Pr(>F)
																State	1	0.6338	0.63382	2.1059	0.14929	0.008	**
	Df	SumsOfSqs	MeanSqs	F.Model	R2	Pr(>F)										Residuals	12	3.6117	0.30097	0.85071
State	1	0.5887	0.58871	2.5248	0.17383	0.004	**									Total	13	4.2455	1
Residuals	12	2.798	0.23317	0.82617												---
Total	13	3.3867	1													Signif.	codes:	0	‘***’	0.001	‘**’	0.01	‘*’	0.05	‘.’	0.1	‘	’	1
---
Signif.	codes:	0	‘***’	0.001	‘**’	0.01	‘*’	0.05	‘.’	0.1	‘	’	1			$IL_vs_MI
																Permutation:	free
$IL_vs_MI																Number	of	permutations:	999
Permutation:	free
Number	of	permutations:	999													Terms	added	sequentially	(first	to	last)
Terms	added	sequentially	(first	to	last)												Df	SumsOfSqs	MeanSqs	F.Model	R2	Pr(>F)
																State	1	1.1401	1.14014	3.289	0.20191	0.001	***
	Df	SumsOfSqs	MeanSqs	F.Model	R2	Pr(>F)										Residuals	13	4.5065	0.34665	0.79809
State	1	1.3108	1.31081	4.7543	0.26778	0.001	***									Total	14	5.6467	1
Residuals	13	3.5842	0.27571	0.73222												---
Total	14	4.895	1													Signif.	codes:	0	‘***’	0.001	‘**’	0.01	‘*’	0.05	‘.’	0.1	‘	’	1
---
Signif.	codes:	0	‘***’	0.001	‘**’	0.01	‘*’	0.05	‘.’	0.1	‘	’	1			$IL_vs_NY
																Permutation:	free
$IL_vs_NY																Number	of	permutations:	999
Permutation:	free
Number	of	permutations:	999													Terms	added	sequentially	(first	to	last)
Terms	added	sequentially	(first	to	last)												Df	SumsOfSqs	MeanSqs	F.Model	R2	Pr(>F)
																State	1	0.9074	0.90741	3.5814	0.2037	0.001	***
	Df	SumsOfSqs	MeanSqs	F.Model	R2	Pr(>F)										Residuals	14	3.5471	0.25337	0.7963
State	1	0.7733	0.77328	3.9497	0.22004	0.002	**									Total	15	4.4545	1
Residuals	14	2.741	0.19578	0.77996												---
Total	15	3.5142	1													Signif.	codes:	0	‘***’	0.001	‘**’	0.01	‘*’	0.05	‘.’	0.1	‘	’	1
---
Signif.	codes:	0	‘***’	0.001	‘**’	0.01	‘*’	0.05	‘.’	0.1	‘	’	1			$IL_vs_PA
																Permutation:	free
$IL_vs_PA																Number	of	permutations:	999
Permutation:	free
Number	of	permutations:	999													Terms	added	sequentially	(first	to	last)
Terms	added	sequentially	(first	to	last)												Df	SumsOfSqs	MeanSqs	F.Model	R2	Pr(>F)
																State	1	1.2692	1.26919	5.8924	0.29621	0.001	***
	Df	SumsOfSqs	MeanSqs	F.Model	R2	Pr(>F)										Residuals	14	3.0155	0.21539	0.70379
State	1	1.0611	1.06107	6.0592	0.30206	0.002	**									Total	15	4.2847	1
Residuals	14	2.4517	0.17512	0.69794												---
Total	15	3.5127	1													Signif.	codes:	0	‘***’	0.001	‘**’	0.01	‘*’	0.05	‘.’	0.1	‘	’	1
---
Signif.	codes:	0	‘***’	0.001	‘**’	0.01	‘*’	0.05	‘.’	0.1	‘	’	1			$IL_vs_TX
																Permutation:	free
$IL_vs_TX																Number	of	permutations:	999
Permutation:	free
Number	of	permutations:	999													Terms	added	sequentially	(first	to	last)
Terms	added	sequentially	(first	to	last)												Df	SumsOfSqs	MeanSqs	F.Model	R2	Pr(>F)
																State	1	0.5762	0.57621	1.8718	0.15767	0.055	.
	Df	SumsOfSqs	MeanSqs	F.Model	R2	Pr(>F)										Residuals	10	3.0784	0.30784	0.84233
State	1	0.53402	0.53402	2.0822	0.17234	0.08	.									Total	11	3.6546	1
Residuals	10	2.56471	0.25647	0.82766												---
Total	11	3.09873	1													Signif.	codes:	0	‘***’	0.001	‘**’	0.01	‘*’	0.05	‘.’	0.1	‘	’	1
---
Signif.	codes:	0	‘***’	0.001	‘**’	0.01	‘*’	0.05	‘.’	0.1	‘	’	1			$IL_vs_SD
																Permutation:	free
$IL_vs_SD																Number	of	permutations:	999
Permutation:	free
Number	of	permutations:	999													Terms	added	sequentially	(first	to	last)
Terms	added	sequentially	(first	to	last)												Df	SumsOfSqs	MeanSqs	F.Model	R2	Pr(>F)
																State	1	0.4096	0.40961	1.1017	0.08409	0.339
	Df	SumsOfSqs	MeanSqs	F.Model	R2	Pr(>F)										Residuals	12	4.4616	0.3718	0.91591
State	1	0.3866	0.38659	1.2404	0.09368	0.228										Total	13	4.8712	1
Residuals	12	3.7401	0.31167	0.90632
Total	13	4.1267	1													$IL_vs_OH
																Permutation:	free
$IL_vs_OH																Number	of	permutations:	999
Permutation:	free
Number	of	permutations:	999													Terms	added	sequentially	(first	to	last)
Terms	added	sequentially	(first	to	last)												Df	SumsOfSqs	MeanSqs	F.Model	R2	Pr(>F)
																State	1	0.3327	0.33269	0.80725	0.06837	0.628
	Df	SumsOfSqs	MeanSqs	F.Model	R2	Pr(>F)										Residuals	11	4.5334	0.41213	0.93163
State	1	0.295	0.29499	0.79596	0.06748	0.607										Total	12	4.8661	1
Residuals	11	4.0767	0.37061	0.93252
Total	12	4.3717	1													$IL_vs_NE
																Permutation:	free
$IL_vs_NE																Number	of	permutations:	999
Permutation:	free
Number	of	permutations:	999													Terms	added	sequentially	(first	to	last)
Terms	added	sequentially	(first	to	last)												Df	SumsOfSqs	MeanSqs	F.Model	R2	Pr(>F)
																State	1	0.3866	0.38662	0.97198	0.07493	0.396
	Df	SumsOfSqs	MeanSqs	F.Model	R2	Pr(>F)										Residuals	12	4.7732	0.39777	0.92507
State	1	0.3483	0.34826	0.99107	0.07629	0.423										Total	13	5.1599	1
Residuals	12	4.2168	0.3514	0.92371
Total	13	4.5651	1													$MI_vs_NY
																Permutation:	free
$MI_vs_NY																Number	of	permutations:	999
Permutation:	free
Number	of	permutations:	999													Terms	added	sequentially	(first	to	last)
Terms	added	sequentially	(first	to	last)												Df	SumsOfSqs	MeanSqs	F.Model	R2	Pr(>F)
																State	1	1.7914	1.7914	8.5384	0.39643	0.001	***
	Df	SumsOfSqs	MeanSqs	F.Model	R2	Pr(>F)										Residuals	13	2.7275	0.2098	0.60357
State	1	1.8828	1.88278	14.376	0.52514	0.002	**									Total	14	4.5189	1
Residuals	13	1.7025	0.13096	0.47486												---
Total	14	3.5853	1													Signif.	codes:	0	‘***’	0.001	‘**’	0.01	‘*’	0.05	‘.’	0.1	‘	’	1
---
Signif.	codes:	0	‘***’	0.001	‘**’	0.01	‘*’	0.05	‘.’	0.1	‘	’	1			$MI_vs_PA
																Permutation:	free
$MI_vs_PA																Number	of	permutations:	999
Permutation:	free
Number	of	permutations:	999													Terms	added	sequentially	(first	to	last)
Terms	added	sequentially	(first	to	last)												Df	SumsOfSqs	MeanSqs	F.Model	R2	Pr(>F)
																State	1	2.2078	2.20777	13.071	0.50135	0.001	***
	Df	SumsOfSqs	MeanSqs	F.Model	R2	Pr(>F)										Residuals	13	2.1958	0.16891	0.49865
State	1	2.2934	2.29343	21.097	0.61873	0.001	***									Total	14	4.4036	1
Residuals	13	1.4132	0.10871	0.38127												---
Total	14	3.7067	1													Signif.	codes:	0	‘***’	0.001	‘**’	0.01	‘*’	0.05	‘.’	0.1	‘	’	1
---
Signif.	codes:	0	‘***’	0.001	‘**’	0.01	‘*’	0.05	‘.’	0.1	‘	’	1			$MI_vs_TX
																Permutation:	free
$MI_vs_TX																Number	of	permutations:	999
Permutation:	free
Number	of	permutations:	999													Terms	added	sequentially	(first	to	last)
Terms	added	sequentially	(first	to	last)												Df	SumsOfSqs	MeanSqs	F.Model	R2	Pr(>F)
																State	1	1.4366	1.43663	5.7243	0.38877	0.005	**
	Df	SumsOfSqs	MeanSqs	F.Model	R2	Pr(>F)										Residuals	9	2.2587	0.25097	0.61123
State	1	1.5949	1.59491	9.4046	0.51099	0.01	**									Total	10	3.6954	1
Residuals	9	1.5263	0.16959	0.48901												---
Total	10	3.1212	1													Signif.	codes:	0	‘***’	0.001	‘**’	0.01	‘*’	0.05	‘.’	0.1	‘	’	1
---
Signif.	codes:	0	‘***’	0.001	‘**’	0.01	‘*’	0.05	‘.’	0.1	‘	’	1			$MI_vs_SD
																Permutation:	free
$MI_vs_SD																Number	of	permutations:	999
Permutation:	free
Number	of	permutations:	999													Terms	added	sequentially	(first	to	last)
Terms	added	sequentially	(first	to	last)												Df	SumsOfSqs	MeanSqs	F.Model	R2	Pr(>F)
																State	1	1.052	1.05201	3.1775	0.22412	0.002	**
	Df	SumsOfSqs	MeanSqs	F.Model	R2	Pr(>F)										Residuals	11	3.6419	0.33109	0.77588
State	1	1.2244	1.2244	4.9854	0.31187	0.002	**									Total	12	4.694	1
Residuals	11	2.7016	0.2456	0.68813												---
Total	12	3.9261	1													Signif.	codes:	0	‘***’	0.001	‘**’	0.01	‘*’	0.05	‘.’	0.1	‘	’	1
---
Signif.	codes:	0	‘***’	0.001	‘**’	0.01	‘*’	0.05	‘.’	0.1	‘	’	1			$MI_vs_OH
																Permutation:	free
$MI_vs_OH																Number	of	permutations:	999
Permutation:	free
Number	of	permutations:	999													Terms	added	sequentially	(first	to	last)
Terms	added	sequentially	(first	to	last)												Df	SumsOfSqs	MeanSqs	F.Model	R2	Pr(>F)
																State	1	0.7519	0.75188	2.0246	0.16837	0.003	**
	Df	SumsOfSqs	MeanSqs	F.Model	R2	Pr(>F)										Residuals	10	3.7137	0.37137	0.83163
State	1	0.8063	0.80626	2.6537	0.20972	0.001	***									Total	11	4.4656	1
Residuals	10	3.0383	0.30383	0.79028												---
Total	11	3.8445	1													Signif.	codes:	0	‘***’	0.001	‘**’	0.01	‘*’	0.05	‘.’	0.1	‘	’	1
---
Signif.	codes:	0	‘***’	0.001	‘**’	0.01	‘*’	0.05	‘.’	0.1	‘	’	1			$MI_vs_NE
																Permutation:	free
$MI_vs_NE																Number	of	permutations:	999
Permutation:	free
Number	of	permutations:	999													Terms	added	sequentially	(first	to	last)
Terms	added	sequentially	(first	to	last)												Df	SumsOfSqs	MeanSqs	F.Model	R2	Pr(>F)
																State	1	0.9268	0.92684	2.5788	0.18991	0.001	***
	Df	SumsOfSqs	MeanSqs	F.Model	R2	Pr(>F)										Residuals	11	3.9536	0.35941	0.81009
State	1	1.0345	1.0345	3.5803	0.24556	0.001	***									Total	12	4.8804	1
Residuals	11	3.1784	0.28894	0.75444												---
Total	12	4.2129	1													Signif.	codes:	0	‘***’	0.001	‘**’	0.01	‘*’	0.05	‘.’	0.1	‘	’	1
---
Signif.	codes:	0	‘***’	0.001	‘**’	0.01	‘*’	0.05	‘.’	0.1	‘	’	1			$NY_vs_PA
																Permutation:	free
$NY_vs_PA																Number	of	permutations:	999
Permutation:	free
Number	of	permutations:	999													Terms	added	sequentially	(first	to	last)
Terms	added	sequentially	(first	to	last)												Df	SumsOfSqs	MeanSqs	F.Model	R2	Pr(>F)
																State	1	2.7538	2.75382	31.18	0.69013	0.001	***
	Df	SumsOfSqs	MeanSqs	F.Model	R2	Pr(>F)										Residuals	14	1.2365	0.08832	0.30987
State	1	2.6072	2.60716	64.035	0.82059	0.001	***									Total	15	3.9903	1
Residuals	14	0.57	0.04071	0.17941												---
Total	15	3.1772	1													Signif.	codes:	0	‘***’	0.001	‘**’	0.01	‘*’	0.05	‘.’	0.1	‘	’	1
---
Signif.	codes:	0	‘***’	0.001	‘**’	0.01	‘*’	0.05	‘.’	0.1	‘	’	1			$NY_vs_TX
																Permutation:	free
$NY_vs_TX																Number	of	permutations:	999
Permutation:	free
Number	of	permutations:	999													Terms	added	sequentially	(first	to	last)
Terms	added	sequentially	(first	to	last)												Df	SumsOfSqs	MeanSqs	F.Model	R2	Pr(>F)
																State	1	0.56208	0.56208	4.3258	0.30196	0.007	**
	Df	SumsOfSqs	MeanSqs	F.Model	R2	Pr(>F)										Residuals	10	1.29935	0.12994	0.69804
State	1	0.336	0.336	4.919	0.32971	0.002	**									Total	11	1.86143	1
Residuals	10	0.68306	0.06831	0.67029												---
Total	11	1.01905	1													Signif.	codes:	0	‘***’	0.001	‘**’	0.01	‘*’	0.05	‘.’	0.1	‘	’	1
---
Signif.	codes:	0	‘***’	0.001	‘**’	0.01	‘*’	0.05	‘.’	0.1	‘	’	1			$NY_vs_SD
																Permutation:	free
$NY_vs_SD																Number	of	permutations:	999
Permutation:	free
Number	of	permutations:	999													Terms	added	sequentially	(first	to	last)
Terms	added	sequentially	(first	to	last)												Df	SumsOfSqs	MeanSqs	F.Model	R2	Pr(>F)
																State	1	1.0181	1.01809	4.5543	0.27511	0.001	***
	Df	SumsOfSqs	MeanSqs	F.Model	R2	Pr(>F)										Residuals	12	2.6826	0.22355	0.72489
State	1	0.91533	0.91533	5.9104	0.33	0.002	**									Total	13	3.7006	1
Residuals	12	1.85841	0.15487	0.67												---
Total	13	2.77374	1													Signif.	codes:	0	‘***’	0.001	‘**’	0.01	‘*’	0.05	‘.’	0.1	‘	’	1
---
Signif.	codes:	0	‘***’	0.001	‘**’	0.01	‘*’	0.05	‘.’	0.1	‘	’	1			$NY_vs_OH
																Permutation:	free
$NY_vs_OH																Number	of	permutations:	999
Permutation:	free
Number	of	permutations:	999													Terms	added	sequentially	(first	to	last)
Terms	added	sequentially	(first	to	last)												Df	SumsOfSqs	MeanSqs	F.Model	R2	Pr(>F)
																State	1	1.0221	1.02213	4.0821	0.27066	0.005	**
	Df	SumsOfSqs	MeanSqs	F.Model	R2	Pr(>F)										Residuals	11	2.7543	0.25039	0.72934
State	1	0.9749	0.97488	4.8854	0.30754	0.001	***									Total	12	3.7764	1
Residuals	11	2.195	0.19955	0.69246												---
Total	12	3.1699	1													Signif.	codes:	0	‘***’	0.001	‘**’	0.01	‘*’	0.05	‘.’	0.1	‘	’	1
---
Signif.	codes:	0	‘***’	0.001	‘**’	0.01	‘*’	0.05	‘.’	0.1	‘	’	1			$NY_vs_NE
																Permutation:	free
$NY_vs_NE																Number	of	permutations:	999
Permutation:	free
Number	of	permutations:	999													Terms	added	sequentially	(first	to	last)
Terms	added	sequentially	(first	to	last)												Df	SumsOfSqs	MeanSqs	F.Model	R2	Pr(>F)
																State	1	0.8317	0.83171	3.3333	0.21739	0.002	**
	Df	SumsOfSqs	MeanSqs	F.Model	R2	Pr(>F)										Residuals	12	2.9942	0.24951	0.78261
State	1	0.6977	0.6977	3.5854	0.23005	0.002	**									Total	13	3.8259	1
Residuals	12	2.3352	0.1946	0.76995												---
Total	13	3.0329	1													Signif.	codes:	0	‘***’	0.001	‘**’	0.01	‘*’	0.05	‘.’	0.1	‘	’	1
---
Signif.	codes:	0	‘***’	0.001	‘**’	0.01	‘*’	0.05	‘.’	0.1	‘	’	1			$PA_vs_TX
																Permutation:	free
$PA_vs_TX																Number	of	permutations:	999
Permutation:	free
Number	of	permutations:	999													Terms	added	sequentially	(first	to	last)
Terms	added	sequentially	(first	to	last)												Df	SumsOfSqs	MeanSqs	F.Model	R2	Pr(>F)
																State	1	1.96033	1.96033	25.534	0.71858	0.002	**
	Df	SumsOfSqs	MeanSqs	F.Model	R2	Pr(>F)										Residuals	10	0.76775	0.07677	0.28142
State	1	1.88442	1.88442	47.858	0.82716	0.004	**									Total	11	2.72807	1
Residuals	10	0.39376	0.03938	0.17284												---
Total	11	2.27818	1													Signif.	codes:	0	‘***’	0.001	‘**’	0.01	‘*’	0.05	‘.’	0.1	‘	’	1
---
Signif.	codes:	0	‘***’	0.001	‘**’	0.01	‘*’	0.05	‘.’	0.1	‘	’	1			$PA_vs_SD
																Permutation:	free
$PA_vs_SD																Number	of	permutations:	999
Permutation:	free
Number	of	permutations:	999													Terms	added	sequentially	(first	to	last)
Terms	added	sequentially	(first	to	last)												Df	SumsOfSqs	MeanSqs	F.Model	R2	Pr(>F)
																State	1	1.2884	1.28837	7.1877	0.3746	0.003	**
	Df	SumsOfSqs	MeanSqs	F.Model	R2	Pr(>F)										Residuals	12	2.151	0.17925	0.6254
State	1	1.2084	1.20842	9.2416	0.43507	0.001	***									Total	13	3.4393	1
Residuals	12	1.5691	0.13076	0.56493												---
Total	13	2.7775	1													Signif.	codes:	0	‘***’	0.001	‘**’	0.01	‘*’	0.05	‘.’	0.1	‘	’	1
---
Signif.	codes:	0	‘***’	0.001	‘**’	0.01	‘*’	0.05	‘.’	0.1	‘	’	1			$PA_vs_OH
																Permutation:	free
$PA_vs_OH																Number	of	permutations:	999
Permutation:	free
Number	of	permutations:	999													Terms	added	sequentially	(first	to	last)
Terms	added	sequentially	(first	to	last)												Df	SumsOfSqs	MeanSqs	F.Model	R2	Pr(>F)
																State	1	1.1319	1.13195	5.6019	0.33743	0.002	**
	Df	SumsOfSqs	MeanSqs	F.Model	R2	Pr(>F)										Residuals	11	2.2227	0.20207	0.66257
State	1	1.0246	1.02457	5.9138	0.34965	0.006	**									Total	12	3.3547	1
Residuals	11	1.9057	0.17325	0.65035												---
Total	12	2.9303	1													Signif.	codes:	0	‘***’	0.001	‘**’	0.01	‘*’	0.05	‘.’	0.1	‘	’	1
---
Signif.	codes:	0	‘***’	0.001	‘**’	0.01	‘*’	0.05	‘.’	0.1	‘	’	1			$PA_vs_NE
																Permutation:	free
$PA_vs_NE																Number	of	permutations:	999
Permutation:	free
Number	of	permutations:	999													Terms	added	sequentially	(first	to	last)
Terms	added	sequentially	(first	to	last)												Df	SumsOfSqs	MeanSqs	F.Model	R2	Pr(>F)
																State	1	1.6935	1.69348	8.2523	0.40747	0.002	**
	Df	SumsOfSqs	MeanSqs	F.Model	R2	Pr(>F)										Residuals	12	2.4626	0.20521	0.59253
State	1	1.6005	1.60047	9.3875	0.43893	0.001	***									Total	13	4.1561	1
Residuals	12	2.0459	0.17049	0.56107												---
Total	13	3.6463	1													Signif.	codes:	0	‘***’	0.001	‘**’	0.01	‘*’	0.05	‘.’	0.1	‘	’	1
---
Signif.	codes:	0	‘***’	0.001	‘**’	0.01	‘*’	0.05	‘.’	0.1	‘	’	1			$TX_vs_SD
																Permutation:	free
$TX_vs_SD																Number	of	permutations:	999
Permutation:	free
Number	of	permutations:	999													Terms	added	sequentially	(first	to	last)
Terms	added	sequentially	(first	to	last)												Df	SumsOfSqs	MeanSqs	F.Model	R2	Pr(>F)
																State	1	0.66296	0.66296	2.3957	0.23045	0.045	*
	Df	SumsOfSqs	MeanSqs	F.Model	R2	Pr(>F)										Residuals	8	2.21384	0.27673	0.76955
State	1	0.56636	0.56636	2.6935	0.25188	0.043	*									Total	9	2.8768	1
Residuals	8	1.68216	0.21027	0.74812												---
Total	9	2.24852	1													Signif.	codes:	0	‘***’	0.001	‘**’	0.01	‘*’	0.05	‘.’	0.1	‘	’	1
---
Signif.	codes:	0	‘***’	0.001	‘**’	0.01	‘*’	0.05	‘.’	0.1	‘	’	1			$TX_vs_OH
																Permutation:	free
$TX_vs_OH																Number	of	permutations:	999
Permutation:	free
Number	of	permutations:	999													Terms	added	sequentially	(first	to	last)
Terms	added	sequentially	(first	to	last)												Df	SumsOfSqs	MeanSqs	F.Model	R2	Pr(>F)
																State	1	0.68294	0.68294	2.0916	0.23006	0.072	.
	Df	SumsOfSqs	MeanSqs	F.Model	R2	Pr(>F)										Residuals	7	2.2856	0.32651	0.76994
State	1	0.70774	0.70774	2.454	0.25957	0.076	.									Total	8	2.96854	1
Residuals	7	2.01879	0.2884	0.74043												---
Total	8	2.72653	1													Signif.	codes:	0	‘***’	0.001	‘**’	0.01	‘*’	0.05	‘.’	0.1	‘	’	1
---
Signif.	codes:	0	‘***’	0.001	‘**’	0.01	‘*’	0.05	‘.’	0.1	‘	’	1			$TX_vs_NE
																Permutation:	free
$TX_vs_NE																Number	of	permutations:	999
Permutation:	free
Number	of	permutations:	999													Terms	added	sequentially	(first	to	last)
Terms	added	sequentially	(first	to	last)												Df	SumsOfSqs	MeanSqs	F.Model	R2	Pr(>F)
																State	1	0.49651	0.49651	1.5728	0.1643	0.094	.
	Df	SumsOfSqs	MeanSqs	F.Model	R2	Pr(>F)										Residuals	8	2.52546	0.31568	0.8357
State	1	0.46962	0.46962	1.7402	0.17866	0.078	.									Total	9	3.02197	1
Residuals	8	2.15891	0.26986	0.82134												---
Total	9	2.62853	1													Signif.	codes:	0	‘***’	0.001	‘**’	0.01	‘*’	0.05	‘.’	0.1	‘	’	1
---
Signif.	codes:	0	‘***’	0.001	‘**’	0.01	‘*’	0.05	‘.’	0.1	‘	’	1			$SD_vs_OH
																Permutation:	free
$SD_vs_OH																Number	of	permutations:	999
Permutation:	free
Number	of	permutations:	999													Terms	added	sequentially	(first	to	last)
Terms	added	sequentially	(first	to	last)												Df	SumsOfSqs	MeanSqs	F.Model	R2	Pr(>F)
																State	1	0.3532	0.35325	0.86655	0.08783	0.635
	Df	SumsOfSqs	MeanSqs	F.Model	R2	Pr(>F)										Residuals	9	3.6688	0.40765	0.91217
State	1	0.3208	0.32083	0.904	0.09128	0.553										Total	10	4.0221	1
Residuals	9	3.1941	0.3549	0.90872
Total	10	3.515	1													$SD_vs_NE
																Permutation:	free
$SD_vs_NE																Number	of	permutations:	999
Permutation:	free
Number	of	permutations:	999													Terms	added	sequentially	(first	to	last)
Terms	added	sequentially	(first	to	last)												Df	SumsOfSqs	MeanSqs	F.Model	R2	Pr(>F)
																State	1	0.4586	0.45862	1.1733	0.10501	0.214
	Df	SumsOfSqs	MeanSqs	F.Model	R2	Pr(>F)										Residuals	10	3.9087	0.39087	0.89499
State	1	0.4512	0.45117	1.3532	0.11919	0.169										Total	11	4.3673	1
Residuals	10	3.3343	0.33343	0.88081
Total	11	3.7854	1													$OH_vs_NE
																Permutation:	free
$OH_vs_NE																Number	of	permutations:	999
Permutation:	free
Number	of	permutations:	999													Terms	added	sequentially	(first	to	last)
Terms	added	sequentially	(first	to	last)												Df	SumsOfSqs	MeanSqs	F.Model	R2	Pr(>F)
																State	1	0.3735	0.37346	0.84442	0.08578	0.658
	Df	SumsOfSqs	MeanSqs	F.Model	R2	Pr(>F)										Residuals	9	3.9804	0.44227	0.91422
State	1	0.3465	0.3465	0.84951	0.08625	0.581										Total	10	4.3539	1
Residuals	9	3.6709	0.40788	0.91375
Total	10	4.0174	1													attr(,"class")
																[1]	pwadstrata	list
