# Supplementary material for: Patterns of Microbiome Composition Vary Across Spatial Scales in a Specialist Insect
Source: Front Microbiol. 2022 Jun 2;13:898744. doi: 10.3389/fmicb.2022.898744 (PMC9201478; doi:10.3389/fmicb.2022.898744)
Supplement: Supplementary file 2 [file Data_Sheet_2.xlsx]

## Sheet: meta_table_bd4_city_gps
sample-id	Name	County	State	Rootworm	Kit	Diet	Collection_date	Year
KP001-A05	ICO16-1	Illif	CO	WCR	DNA_BT	Wild	2016-08-04	2016
KP002-A06	ICO16-2	Illif	CO	WCR	DNA_BT	Wild	2016-08-04	2016
KP003-A07	ICO16-3	Illif	CO	WCR	DNA_BT	Wild	2016-08-04	2016
KP004-A08	ICO16-4	Illif	CO	WCR	DNA_BT	Wild	2016-08-04	2016
KP005-A09	ICO16-5	Illif	CO	WCR	DNA_BT	Wild	2016-08-04	2016
KP006-A10	ICO16-6	Illif	CO	WCR	DNA_BT	Wild	2016-08-04	2016
KP007-A11	ICO16-7	Illif	CO	WCR	DNA_BT	Wild	2016-08-04	2016
KP008-A12	ICO16-8	Illif	CO	WCR	DNA_BT	Wild	2016-08-04	2016
KP009-B01	JCO16-1	Jullesburg	CO	WCR	DNA_BT	Wild	2016-08-01	2016
KP010-B02	JCO16-2	Jullesburg	CO	WCR	DNA_BT	Wild	2016-08-01	2016
KP011-B03	JCO16-3	Jullesburg	CO	WCR	DNA_BT	Wild	2016-08-01	2016
KP012-B04	JCO16-5	Jullesburg	CO	WCR	DNA_BT	Wild	2016-08-01	2016
KP013-B05	JCO16-7	Jullesburg	CO	WCR	DNA_BT	Wild	2016-08-01	2016
KP014-B06	JCO16-8	Jullesburg	CO	WCR	DNA_BT	Wild	2016-08-01	2016
KP015-B07	JCO16-9	Jullesburg	CO	WCR	DNA_BT	Wild	2016-08-01	2016
KP016-B08	JCO16-10	Jullesburg	CO	WCR	DNA_BT	Wild	2016-08-01	2016
KP017-B09	OCO16-2	Ovid	CO	WCR	DNA_BT	Wild	2016-08-02	2016
KP018-B10	OCO16-3	Ovid	CO	WCR	DNA_BT	Wild	2016-08-02	2016
KP019-B11	OCO16-4	Ovid	CO	WCR	DNA_BT	Wild	2016-08-02	2016
KP020-B12	OCO16-5	Ovid	CO	WCR	DNA_BT	Wild	2016-08-02	2016
KP021-C01	OCO16-6	Ovid	CO	WCR	DNA_BT	Wild	2016-08-02	2016
KP022-C02	OCO16-7	Ovid	CO	WCR	DNA_BT	Wild	2016-08-02	2016
KP023-C03	OCO16-8	Ovid	CO	WCR	DNA_BT	Wild	2016-08-02	2016
KP024-C04	OCO16-12	Ovid	CO	WCR	DNA_BT	Wild	2016-08-02	2016
KP025-C05	MCO16-1	Merino	CO	WCR	DNA_BT	Wild	2016-08-06	2016
KP026-C06	MCO16-2	Merino	CO	WCR	DNA_BT	Wild	2016-08-06	2016
KP027-C07	MCO16-3	Merino	CO	WCR	DNA_BT	Wild	2016-08-06	2016
KP028-C08	MCO16-4	Merino	CO	WCR	DNA_BT	Wild	2016-08-06	2016
KP029-C09	MCO16-6	Merino	CO	WCR	DNA_BT	Wild	2016-08-06	2016
KP030-C10	MCO16-7	Merino	CO	WCR	DNA_BT	Wild	2016-08-06	2016
KP031-C11	MCO16-8	Merino	CO	WCR	DNA_BT	Wild	2016-08-06	2016
KP032-C12	MCO16-9	Merino	CO	WCR	DNA_BT	Wild	2016-08-06	2016
KP033-D01	FCO16-1	Ft_Morgan	CO	WCR	DNA_BT	Wild	2016-08-08	2016
KP034-D02	FCO16-2	Ft_Morgan	CO	WCR	DNA_BT	Wild	2016-08-08	2016
KP035-D03	FCO16-4	Ft_Morgan	CO	WCR	DNA_BT	Wild	2016-08-08	2016
KP036-D04	FCO16-5	Ft_Morgan	CO	WCR	DNA_BT	Wild	2016-08-08	2016
KP037-D05	FCO16-6	Ft_Morgan	CO	WCR	DNA_BT	Wild	2016-08-08	2016
KP038-D06	FCO16-7	Ft_Morgan	CO	WCR	DNA_BT	Wild	2016-08-08	2016
KP039-D07	FCO16-8	Ft_Morgan	CO	WCR	DNA_BT	Wild	2016-08-08	2016
KP040-D08	FCO16-10	Ft_Morgan	CO	WCR	DNA_BT	Wild	2016-08-08	2016
KP041-D09	KCO16-6	Kennesburg	CO	WCR	DNA_BT	Wild	2016-08-11	2016
KP042-D10	KCO16-7	Kennesburg	CO	WCR	DNA_BT	Wild	2016-08-11	2016
KP043-D11	KCO16-9	Kennesburg	CO	WCR	DNA_BT	Wild	2016-08-11	2016
KP044-D12	KCO16-10	Kennesburg	CO	WCR	DNA_BT	Wild	2016-08-11	2016
KP045-E01	KCO16-11	Kennesburg	CO	WCR	DNA_BT	Wild	2016-08-11	2016
KP046-E02	KCO16-12	Kennesburg	CO	WCR	DNA_BT	Wild	2016-08-11	2016
KP047-E03	KCO16-14	Kennesburg	CO	WCR	DNA_BT	Wild	2016-08-11	2016
KP048-E04	KCO16-15	Kennesburg	CO	WCR	DNA_BT	Wild	2016-08-11	2016
KP049-E05	WIC16-2	Wiggins	CO	WCR	DNA_BT	Wild	2016-08-10	2016
KP050-E06	WIC16-3	Wiggins	CO	WCR	DNA_BT	Wild	2016-08-10	2016
KP051-E07	WIC16-4	Wiggins	CO	WCR	DNA_BT	Wild	2016-08-10	2016
KP052-E08	WIC16-6	Wiggins	CO	WCR	DNA_BT	Wild	2016-08-10	2016
KP053-E09	WIC16-7	Wiggins	CO	WCR	DNA_BT	Wild	2016-08-10	2016
KP054-E10	WIC16-9	Wiggins	CO	WCR	DNA_BT	Wild	2016-08-10	2016
KP055-E11	WIC16-10	Wiggins	CO	WCR	DNA_BT	Wild	2016-08-10	2016
KP056-E12	WIC16-11	Wiggins	CO	WCR	DNA_BT	Wild	2016-08-10	2016
KP057-F01	HCO16-3	Holyoke	CO	WCR	DNA_BT	Wild	2016-08-11	2016
KP058-F02	HCO16-7	Holyoke	CO	WCR	DNA_BT	Wild	2016-08-11	2016
KP059-F03	HCO16-10	Holyoke	CO	WCR	DNA_BT	Wild	2016-08-11	2016
KP060-F04	HCO16-11	Holyoke	CO	WCR	DNA_BT	Wild	2016-08-11	2016
KP061-F05	HCO16-12	Holyoke	CO	WCR	DNA_BT	Wild	2016-08-11	2016
KP062-F06	HCO16-13	Holyoke	CO	WCR	DNA_BT	Wild	2016-08-11	2016
KP063-F07	HCO16-14	Holyoke	CO	WCR	DNA_BT	Wild	2016-08-11	2016
KP064-F08	HCO16-15	Holyoke	CO	WCR	DNA_BT	Wild	2016-08-11	2016
KP065-F09	WCO16-3	Wray	CO	WCR	DNA_BT	Wild	2016-08-10	2016
KP066-F10	WCO16-5	Wray	CO	WCR	DNA_BT	Wild	2016-08-10	2016
KP067-F11	WCO16-6	Wray	CO	WCR	DNA_BT	Wild	2016-08-10	2016
KP068-F12	WCO16-7	Wray	CO	WCR	DNA_BT	Wild	2016-08-10	2016
KP069-G01	WCO16-9	Wray	CO	WCR	DNA_BT	Wild	2016-08-10	2016
KP070-G02	WCO16-10	Wray	CO	WCR	DNA_BT	Wild	2016-08-10	2016
KP071-G03	WCO16-11	Wray	CO	WCR	DNA_BT	Wild	2016-08-10	2016
KP072-G04	WCO16-12	Wray	CO	WCR	DNA_BT	Wild	2016-08-10	2016
KP073-G05	IDC16-1	Idalia	CO	WCR	DNA_BT	Wild	2016-08-06	2016
KP074-G06	IDC16-2	Idalia	CO	WCR	DNA_BT	Wild	2016-08-06	2016
KP075-G07	IDC16-3	Idalia	CO	WCR	DNA_BT	Wild	2016-08-06	2016
KP076-G08	IDC16-4	Idalia	CO	WCR	DNA_BT	Wild	2016-08-06	2016
KP077-G09	IDC16-5	Idalia	CO	WCR	DNA_BT	Wild	2016-08-06	2016
KP078-G10	IDC16-6	Idalia	CO	WCR	DNA_BT	Wild	2016-08-06	2016
KP079-G11	IDC16-7	Idalia	CO	WCR	DNA_BT	Wild	2016-08-06	2016
KP080-G12	IDC16-8	Idalia	CO	WCR	DNA_BT	Wild	2016-08-06	2016
KP081-H01	BCO16-1	Burlington	CO	WCR	DNA_BT	Wild	2016-08-04	2016
KP082-H02	BCO16-3	Burlington	CO	WCR	DNA_BT	Wild	2016-08-04	2016
KP083-H03	BCO16-6	Burlington	CO	WCR	DNA_BT	Wild	2016-08-04	2016
KP084-H04	BCO16-8	Burlington	CO	WCR	DNA_BT	Wild	2016-08-04	2016
KP085-H05	BCO16-10	Burlington	CO	WCR	DNA_BT	Wild	2016-08-04	2016
KP086-H06	BCO16-12	Burlington	CO	WCR	DNA_BT	Wild	2016-08-04	2016
KP087-H07	BCO16-13	Burlington	CO	WCR	DNA_BT	Wild	2016-08-04	2016
KP088-H08	BCO16-14	Burlington	CO	WCR	DNA_BT	Wild	2016-08-04	2016
KP089-H09	ACO16-7	Arapahoe	CO	WCR	DNA_BT	Wild	2016-08-02	2016
KP090-H10	ACO16-8	Arapahoe	CO	WCR	DNA_BT	Wild	2016-08-02	2016
KP091-H11	ACO16-10	Arapahoe	CO	WCR	DNA_BT	Wild	2016-08-02	2016
KP092-H12	ACO16-14	Arapahoe	CO	WCR	DNA_BT	Wild	2016-08-02	2016
KP093-A01	ACO16-17	Arapahoe	CO	WCR	DNA_BT	Wild	2016-08-02	2016
KP094-A02	ACO16-21	Arapahoe	CO	WCR	DNA_BT	Wild	2016-08-02	2016
KP095-A03	ACO16-26	Arapahoe	CO	WCR	DNA_BT	Wild	2016-08-02	2016
KP096-A04	ACO16-27	Arapahoe	CO	WCR	DNA_BT	Wild	2016-08-02	2016
KP097-A05	SKS16-1	Sharon_Spring	KS	WCR	DNA_BT	Wild	2016-08-01	2016
KP098-A06	SKS16-2	Sharon_Spring	KS	WCR	DNA_BT	Wild	2016-08-01	2016
KP099-A07	SKS16-3	Sharon_Spring	KS	WCR	DNA_BT	Wild	2016-08-01	2016
KP100-A08	SKS16-4	Sharon_Spring	KS	WCR	DNA_BT	Wild	2016-08-01	2016
KP101-A09	SKS16-6	Sharon_Spring	KS	WCR	DNA_BT	Wild	2016-08-01	2016
KP102-A10	SKS16-7	Sharon_Spring	KS	WCR	DNA_BT	Wild	2016-08-01	2016
KP103-A11	SKS16-9	Sharon_Spring	KS	WCR	DNA_BT	Wild	2016-08-01	2016
KP104-A12	SKS16-10	Sharon_Spring	KS	WCR	DNA_BT	Wild	2016-08-01	2016
KP105-B01	SCO16-3	South_Holyoke	CO	WCR	DNA_BT	Wild	2016-08-09	2016
KP106-B02	SCO16-4	South_Holyoke	CO	WCR	DNA_BT	Wild	2016-08-09	2016
KP107-B03	SCO16-5	South_Holyoke	CO	WCR	DNA_BT	Wild	2016-08-09	2016
KP108-B04	SCO16-7	South_Holyoke	CO	WCR	DNA_BT	Wild	2016-08-09	2016
KP109-B05	SCO16-8	South_Holyoke	CO	WCR	DNA_BT	Wild	2016-08-09	2016
KP110-B06	SCO16-6	South_Holyoke	CO	WCR	DNA_BT	Wild	2016-08-09	2016
KP111-B07	WAZ13-3	Wilcox	AZ	WCR	DNA_BT	Wild		2016
KP112-B08	WAZ13-4	Wilcox	AZ	WCR	DNA_BT	Wild		2016
KP113-B09	WAZ13-5	Wilcox	AZ	WCR	DNA_BT	Wild		2016
KP114-B10	WAZ13-6	Wilcox	AZ	WCR	DNA_BT	Wild		2016
KP115-B11	WAZ13-7	Wilcox	AZ	WCR	DNA_BT	Wild		2016
KP116-B12	WAZ13-8	Wilcox	AZ	WCR	DNA_BT	Wild		2016
KP117-C01	WAZ13-9	Wilcox	AZ	WCR	DNA_BT	Wild		2016
KP118-C02	WAZ13-10	Wilcox	AZ	WCR	DNA_BT	Wild		2016
KP151-E11	CIL18-1	Champaign	IL	WCR	FECAL	Wild	2018-07-03	2018
KP152-E12	CIL18-2	Champaign	IL	WCR	FECAL	Wild	2018-07-03	2018
KP153-F01	CIL18-3	Champaign	IL	WCR	FECAL	Wild	2018-07-03	2018
KP154-F02	CIL18-4	Champaign	IL	WCR	FECAL	Wild	2018-07-03	2018
KP155-F03	CIL18-5	Champaign	IL	WCR	FECAL	Wild	2018-07-03	2018
KP156-F04	CIL18-6	Champaign	IL	WCR	FECAL	Wild	2018-07-03	2018
KP157-F05	CIL18-7	Champaign	IL	WCR	FECAL	Wild	2018-07-03	2018
KP158-F06	CIL18-8	Champaign	IL	WCR	FECAL	Wild	2018-07-03	2018
KP159-F07	MMI-1	Mason	MI	WCR	FECAL	Wild	2019-08-09	2019
KP160-F08	MMI-2	Mason	MI	WCR	FECAL	Wild	2019-08-09	2019
KP161-F09	MMI-3	Mason	MI	WCR	FECAL	Wild	2019-08-09	2019
KP162-F10	MMI-4	Mason	MI	WCR	FECAL	Wild	2019-08-09	2019
KP163-F11	MMI-5	Mason	MI	WCR	FECAL	Wild	2019-08-09	2019
KP164-F12	MMI-6	Mason	MI	WCR	FECAL	Wild	2019-08-09	2019
KP165-G01	MMI-7	Mason	MI	WCR	FECAL	Wild	2019-08-09	2019
KP166-G02	MMI-8	Mason	MI	WCR	FECAL	Wild	2019-08-09	2019
KP175-G11	KNY-1	Ledyard	NY	WCR	FECAL	Wild	2019-07-18	2019
KP176-G12	KNY-2	Ledyard	NY	WCR	FECAL	Wild	2019-07-18	2019
KP177-H01	KNY-3	Ledyard	NY	WCR	FECAL	Wild	2019-07-18	2019
KP178-H02	KNY-4	Ledyard	NY	WCR	FECAL	Wild	2019-07-18	2019
KP179-H03	KNY-5	Ledyard	NY	WCR	FECAL	Wild	2019-07-18	2019
KP180-H04	KNY-6	Ledyard	NY	WCR	FECAL	Wild	2019-07-18	2019
KP181-H05	KNY-7	Ledyard	NY	WCR	FECAL	Wild	2019-07-18	2019
KP182-H06	KNY-8	Ledyard	NY	WCR	FECAL	Wild	2019-07-18	2019
KP183-H07	PA19-1	Ramblewood	PA	WCR	FECAL	Wild	2019-08-08	2019
KP184-H08	PA19-2	Ramblewood	PA	WCR	FECAL	Wild	2019-08-08	2019
KP185-H09	PA19-3	Ramblewood	PA	WCR	FECAL	Wild	2019-08-08	2019
KP186-H10	PA19-4	Ramblewood	PA	WCR	FECAL	Wild	2019-08-08	2019
KP187-H11	PA19-5	Ramblewood	PA	WCR	FECAL	Wild	2019-08-08	2019
KP188-H12	PA19-6	Ramblewood	PA	WCR	FECAL	Wild	2019-08-08	2019
KP189-A01	PA19-7	Ramblewood	PA	WCR	FECAL	Wild	2019-08-08	2019
KP190-A02	PA19-8	Ramblewood	PA	WCR	FECAL	Wild	2019-08-08	2019
KP207-A12	TX20-1	Dimmitt	TX	WCR	FECAL	Wild	2020-07-17	2020
KP208-B01	TX20-2	Dimmitt	TX	WCR	FECAL	Wild	2020-07-17	2020
KP209-B02	TX20-3	Dimmitt	TX	WCR	FECAL	Wild	2020-07-17	2020
KP210-B03	TX20-4	Dimmitt	TX	WCR	FECAL	Wild	2020-07-17	2020
KP211-B04	TX20-5	Dimmitt	TX	WCR	FECAL	Wild	2020-07-17	2020
KP212-B05	TX20-6	Dimmitt	TX	WCR	FECAL	Wild	2020-07-17	2020
KP213-B06	TX20-7	Dimmitt	TX	WCR	FECAL	Wild	2020-07-17	2020
KP214-B07	TX20-8	Dimmitt	TX	WCR	FECAL	Wild	2020-07-17	2020
KP215-B08	KS20-1	Garden_city	KS	WCR	FECAL	Wild	2020-07-22	2020
KP216-B09	KS20-2	Garden_city	KS	WCR	FECAL	Wild	2020-07-22	2020
KP217-B10	KS20-3	Garden_city	KS	WCR	FECAL	Wild	2020-07-22	2020
KP218-B11	KS20-4	Garden_city	KS	WCR	FECAL	Wild	2020-07-22	2020
KP219-B12	KS20-5	Garden_city	KS	WCR	FECAL	Wild	2020-07-22	2020
KP220-C01	KS20-6	Garden_city	KS	WCR	FECAL	Wild	2020-07-22	2020
KP221-C02	KS20-7	Garden_city	KS	WCR	FECAL	Wild	2020-07-22	2020
KP222-C03	KS20-8	Garden_city	KS	WCR	FECAL	Wild	2020-07-22	2020
KP223-C04	SD20-1	Bryant	SD	WCR	FECAL	Wild	2020-08-03	2020
KP224-C05	SD20-2	Bryant	SD	WCR	FECAL	Wild	2020-08-03	2020
KP225-C06	SD20-3	Bryant	SD	WCR	FECAL	Wild	2020-08-03	2020
KP226-C07	SD20-4	Bryant	SD	WCR	FECAL	Wild	2020-08-03	2020
KP227-C08	SD20-5	Bryant	SD	WCR	FECAL	Wild	2020-08-03	2020
KP228-C09	SD20-6	Bryant	SD	WCR	FECAL	Wild	2020-08-03	2020
KP229-C10	SD20-7	Bryant	SD	WCR	FECAL	Wild	2020-08-03	2020
KP230-C11	SD20-8	Bryant	SD	WCR	FECAL	Wild	2020-08-03	2020
KP231-C12	OH20-1	Wayne	OH	WCR	FECAL	Wild	2020-07-30	2020
KP232-D01	OH20-2	Wayne	OH	WCR	FECAL	Wild	2020-07-30	2020
KP233-D02	OH20-3	Wayne	OH	WCR	FECAL	Wild	2020-07-30	2020
KP234-D03	OH20-4	Wayne	OH	WCR	FECAL	Wild	2020-07-30	2020
KP235-D04	OH20-5	Wayne	OH	WCR	FECAL	Wild	2020-07-30	2020
KP236-D05	OH20-6	Wayne	OH	WCR	FECAL	Wild	2020-07-30	2020
KP237-D06	OH20-7	Wayne	OH	WCR	FECAL	Wild	2020-07-30	2020
KP238-D07	OH20-8	Wayne	OH	WCR	FECAL	Wild	2020-07-30	2020
KP239-D08	RND20-N1	Sheldon	ND	NCR	FECAL	Wild	2020-08-26	2020
KP240-D09	RND20-N2	Sheldon	ND	NCR	FECAL	Wild	2020-08-26	2020
KP241-D10	RND20-N3	Sheldon	ND	NCR	FECAL	Wild	2020-08-26	2020
KP242-D11	RND20-N4	Sheldon	ND	NCR	FECAL	Wild	2020-08-26	2020
KP243-D12	RND20-N5	Sheldon	ND	NCR	FECAL	Wild	2020-08-26	2020
KP244-E01	RND20-N6	Sheldon	ND	NCR	FECAL	Wild	2020-08-26	2020
KP245-E02	RND20-N7	Sheldon	ND	NCR	FECAL	Wild	2020-08-26	2020
KP246-E03	RND20-N8	Sheldon	ND	NCR	FECAL	Wild	2020-08-26	2020
KP247-E04	MN20-N1	Johnsburg	MN	NCR	FECAL	Wild	2020-08-14	2020
KP248-E05	MN20-N2	Johnsburg	MN	NCR	FECAL	Wild	2020-08-14	2020
KP249-E06	MN20-N3	Johnsburg	MN	NCR	FECAL	Wild	2020-08-14	2020
KP250-E07	MN20-N4	Johnsburg	MN	NCR	FECAL	Wild	2020-08-14	2020
KP251-E08	MN20-N5	Johnsburg	MN	NCR	FECAL	Wild	2020-08-14	2020
KP252-E09	MN20-N6	Johnsburg	MN	NCR	FECAL	Wild	2020-08-14	2020
KP253-E10	MN20-N7	Johnsburg	MN	NCR	FECAL	Wild	2020-08-14	2020
KP254-E11	MN20-N8	Johnsburg	MN	NCR	FECAL	Wild	2020-08-14	2020
KP255-E12	NMO20-N1	Graham	MO	NCR	FECAL	Wild	2020-07-28	2020
KP256-F01	NMO20-N2	Graham	MO	NCR	FECAL	Wild	2020-07-29	2020
KP257-F02	NMO20-N3	Graham	MO	NCR	FECAL	Wild	2020-07-30	2020
KP258-F03	NMO20-N4	Graham	MO	NCR	FECAL	Wild	2020-07-31	2020
KP259-F04	NMO20-N5	Graham	MO	NCR	FECAL	Wild	2020-08-01	2020
KP260-F05	NMO20-N6	Graham	MO	NCR	FECAL	Wild	2020-08-02	2020
KP261-F06	NMO20-N7	Graham	MO	NCR	FECAL	Wild	2020-08-03	2020
KP262-F07	NMO20-N8	Graham	MO	NCR	FECAL	Wild	2020-08-04	2020
KP263-F08	BMO20-N1	Columbia	MO	NCR	FECAL	Wild	2020-07-24	2020
KP264-F09	BMO20-N2	Columbia	MO	NCR	FECAL	Wild	2020-07-24	2020
KP265-F10	BMO20-N3	Columbia	MO	NCR	FECAL	Wild	2020-07-24	2020
KP266-F11	BMO20-N4	Columbia	MO	NCR	FECAL	Wild	2020-07-24	2020
KP267-F12	BMO20-N5	Columbia	MO	NCR	FECAL	Wild	2020-07-24	2020
KP268-G01	BMO20-N6	Columbia	MO	NCR	FECAL	Wild	2020-07-24	2020
KP269-G02	BMO20-N7	Columbia	MO	NCR	FECAL	Wild	2020-07-24	2020
KP270-G03	BMO20-N8	Columbia	MO	NCR	FECAL	Wild	2020-07-24	2020
KP276-G09	BNE20-1	Belgrade	NE	WCR	FECAL	Wild	2020-08-18	2020
KP277-G10	BNE20-2	Belgrade	NE	WCR	FECAL	Wild	2020-08-18	2020
KP278-G11	BNE20-3	Belgrade	NE	WCR	FECAL	Wild	2020-08-18	2020
KP279-G12	BNE20-4	Belgrade	NE	WCR	FECAL	Wild	2020-08-18	2020
KP280-H01	BNE20-5	Belgrade	NE	WCR	FECAL	Wild	2020-08-18	2020
KP281-H02	BNE20-6	Belgrade	NE	WCR	FECAL	Wild	2020-08-18	2020
KP282-H03	BNE20-7	Belgrade	NE	WCR	FECAL	Wild	2020-08-18	2020
KP283-H04	BNE20-8	Belgrade	NE	WCR	FECAL	Wild	2020-08-18	2020
